# Supplementary material for: Asymmetric cyclopropanation via an electro-organocatalytic cascade
Source: Royal Society of Chemistry journal article supplement (doi:10.1039/d4cc05092d), 2024-01-01
Supplement: d4cc05092d1.pdf [file d4cc05092d1.pdf]

## SUPPLEMENTARY INFORMATION

### **Asymmetric cyclopropanation *via* electro-organocatalytic cascade**

**Anastasiya Krech, ‡ Marharyta Laktsevich-Iskryk, ‡ Nora Deil, Mihhail Fokin, Mariliis Kimm and Maksim Ošek\***

‡ These authors contributed equally.

Department of Chemistry and Biotechnology, Tallinn University of Technology, Akadeemia tee 15, Tallinn 12618, Estonia.

E-mail: maksim.oseka@taltech.ee

## Table of contents

|      |                                                                           |     |
|------|---------------------------------------------------------------------------|-----|
| 1.   | General information .....                                                 | S3  |
| 2.   | Optimization of reaction conditions .....                                 | S4  |
| 2.1. | Screening of EtOH conditions .....                                        | S4  |
| 2.2. | Screening of additional parameters for standard reaction conditions ..... | S6  |
| 2.3. | Screening of organocatalysts .....                                        | S7  |
| 3.   | Effect of temperature on reaction outcome .....                           | S8  |
| 3.   | Kinetic studies of the model reaction .....                               | S9  |
| 4.   | Kinetic studies of <b>4a</b> cyclopropanation.....                        | S10 |
| 5.   | Cyclic voltammetry .....                                                  | S11 |
| 6.   | Substrate scope limitations .....                                         | S13 |
| 7.   | Alternative mechanism .....                                               | S14 |
| 8.   | General procedure .....                                                   | S15 |
| 9.   | References .....                                                          | S19 |
| 10.  | NMR spectra .....                                                         | S20 |
| 11.  | HPLC chromatograms .....                                                  | S34 |

## 1. General information

$^1\text{H}$  and  $^{13}\text{C}$  NMR spectra were recorded on a Bruker Avance III instrument at 400 MHz for  $^1\text{H}$  and 100.6 MHz for  $^{13}\text{C}$ .  $^1\text{H}$  NMR spectra are reported in parts per million (ppm) downfield relative to  $\text{CDCl}_3$  (7.26 ppm) and  $^{13}\text{C}$  NMR spectra are reported in ppm relative to  $\text{CDCl}_3$  (77.16 ppm). HRMS measurements were performed on Agilent 6540 UHD Accurate-Mass Q-TOF LC/MS system (Agilent Technologies, Santa Clara, CA, US) equipped with AJS-ESI source. Precoated silica gel plates (Merck 60 F254 or F254, Supelco Sigma-Aldrich™) were used for TLC analysis. Flash column chromatography was performed on a Biotage® Isolera Prime with silica gel Kieselgel 63–200  $\mu\text{m}$ . Purchased chemicals (Sigma Aldrich, TCI, Honeywell and Fluorochem) and solvents (Honeywell, Keemiakaubandus AS, Lach:ner) were used as received.

For all electrochemical reactions, a homemade cell was used, together with a six-channel power supply (Fig. S1). The cell consists of a working electrode and a counter electrode. The material used for the electrodes were Stainless Steel electrode (316L) and Graphite AC-K800 premium Grade (purchased by IKA).

HPLC determination of enantiomeric excess was performed with an Agilent Technologies 1200 series chromatograph by using appropriate chiral columns (see below). Specific rotations were measured using an Anton Paar MCP 500 polarimeter.

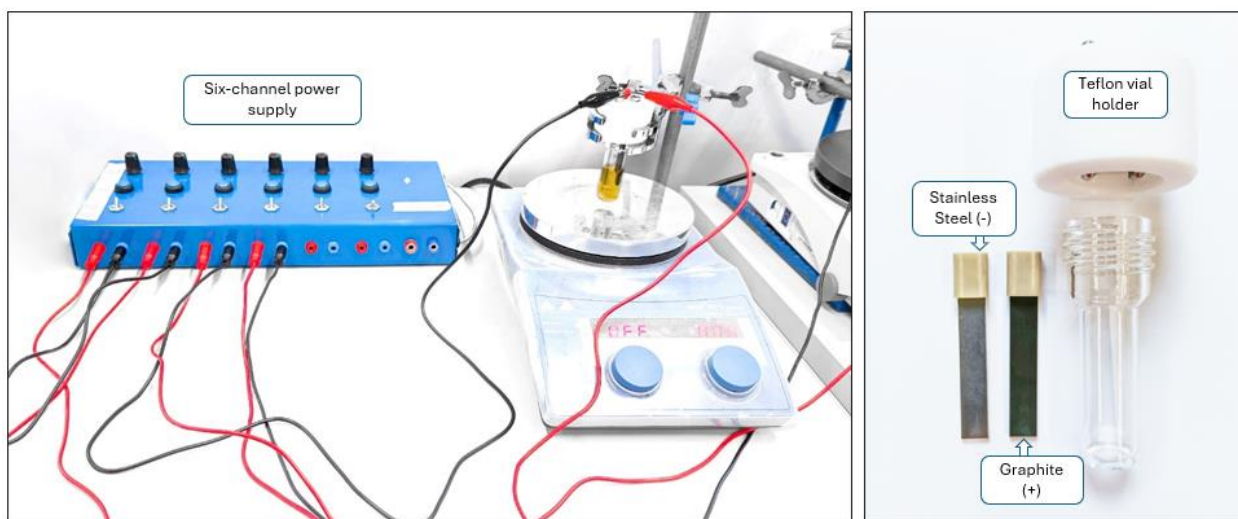

**Figure S1.** Electrochemical reaction setup.

## 2. Optimization of reaction conditions

### 2.1. Screening of EtOH conditions

Organocatalyst I (0.06 mmol, 20 mol%, 19.5 mg), TEAI (0.12 mmol, 40 mol%, 30.8 mg), and cinnamic acid (0.12 mmol, 17.8 mg) were dissolved in EtOH (0.1 M, 3 mL). To the resulting solution, cinnamic aldehyde (0.45 mmol, 1.5 equiv., 57  $\mu$ L) and dimethyl malonate (0.3 mmol, 1 equiv., 34  $\mu$ L) were sequentially added. The reaction vessel was sealed with a Teflon cap equipped with stainless steel and graphite electrodes (gap between electrodes of 0.5 cm) and flushed with Ar for 5 minutes. The vial was then connected to a power supply, and the reaction mixture was electrolyzed under a constant current of 1 mA for 16 hours while stirring at 800 rpm. After completion of the reaction, the cap was removed, and the electrodes were rinsed with  $\text{CH}_2\text{Cl}_2$ . The reaction mixture was combined with the rinses, and the resulting solution was analyzed by  $^1\text{H}$  NMR using trimethoxybenzene as an external standard.

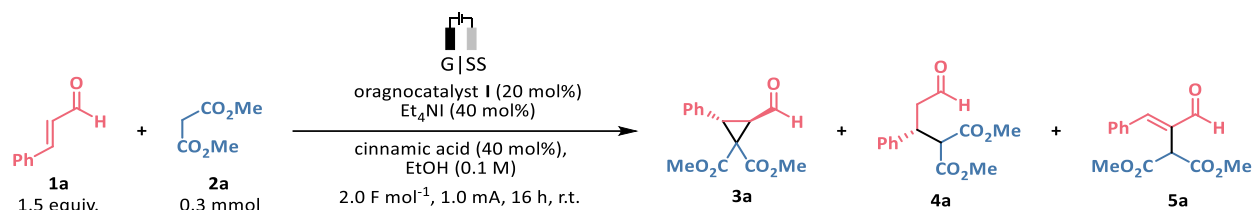

| Entry | Deviation from reaction conditions                                 | NMR yield, % <sup>a</sup> |           |           | d.r. of <b>3a</b> <sup>b</sup> |
|-------|--------------------------------------------------------------------|---------------------------|-----------|-----------|--------------------------------|
|       |                                                                    | <b>3a</b>                 | <b>4a</b> | <b>5a</b> |                                |
| 1     | None                                                               | 57                        | 6         | 11        | >20:1                          |
| 2     | 3 equiv. of <b>1a</b>                                              | 37                        | 27        | -         | >20:1                          |
| 3     | <i>n</i> Bu <sub>4</sub> NI instead of <i>n</i> Et <sub>4</sub> NI | 22                        | 7         | 4         | >20:1                          |
| 4     | Me <sub>4</sub> NI instead of <i>n</i> Et <sub>4</sub> NI          | 28                        | 5         | 4         | >20:1                          |
| 5     | Me <sub>4</sub> NBr instead of <i>n</i> Et <sub>4</sub> NI         | -                         | 26        | -         |                                |
| 6     | Cat. II–IV as organocatalysts                                      | 31-52                     | 3-16      | 3-11      | >20:1                          |
| 7     | 10 mol% of cat. I                                                  | 42                        | 12        | 4         | >20:1                          |
| 8     | Pt as a cathode                                                    | 36                        | 25        | 6         | >20:1                          |
| 9     | Graphite as a cathode                                              | 42                        | 11        | 6         | >20:1                          |
| 10    | TFA instead of cinnamic acid                                       | 47                        | 19        | -         | >20:1                          |
| 11    | Without cinnamic acid                                              | 37                        | 6         | -         | >20:1                          |
| 10    | At 0 °C                                                            | 33                        | 19        | 3         | >20:1                          |
| 11    | Constant potential, 2 V, 16 h                                      | 27                        | -         | 7         | >20:1                          |
| 12    | No electricity                                                     | -                         | 52        | -         |                                |
| 13    | No halogen source                                                  | -                         | 41        | -         |                                |

**Table S1.** <sup>a</sup>Yields were determined by  $^1\text{H}$  NMR analysis of the crude reaction mixture using trimethoxybenzene as an internal standard. <sup>b</sup>Diastereomeric ratio of **3a** was determined by  $^1\text{H}$  NMR analysis of the crude reaction mixture.

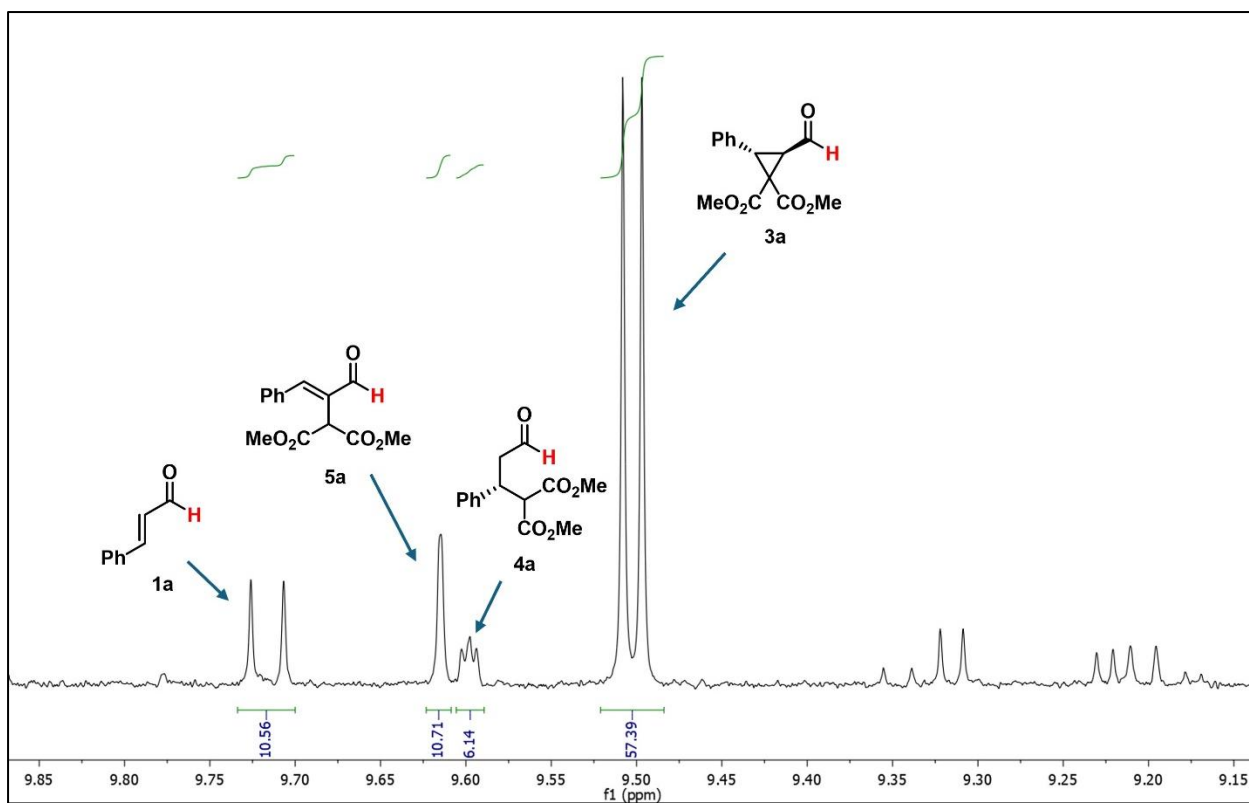

**Figure S2.** Characteristic signals of the main products and cinnamic aldehyde in  $^1\text{H}$  NMR spectrum of the reaction mixture (**Table S1**, Entry 1).

## 2.2. Screening of additional parameters for standard reaction conditions

Organocatalyst **I** (0.06 mmol, 20 mol%, 19.5 mg), TBAClO<sub>4</sub> (0.3 mmol, 1 equiv., 102.6 mg), TEAI (0.06 mmol, 20 mol%, 15.4 mg) were dissolved in CH<sub>2</sub>Cl<sub>2</sub> (0.1 M, 3 mL). To the resulting solution, HFIP (0.6 mmol, 2 equiv., 63.0 μL), H<sub>2</sub>O (0.6 mmol, 2 equiv., 10.8 μL), cinnamic aldehyde (0.45 mmol, 1.5 equiv., 57 μL) and dimethyl malonate (0.3 mmol, 1 equiv., 34 μL) were sequentially added. The reaction vessel was sealed with a Teflon cap equipped with stainless steel and graphite electrodes (gap between electrodes of 0.5 cm) and flushed with Ar for 5 minutes. The vial was then connected to a power supply, and the reaction mixture was electrolyzed under a constant current of 3.2 mA for 5 hours while stirring at 800 rpm. After completion of the reaction, the cap was removed, and the electrodes were rinsed with CH<sub>2</sub>Cl<sub>2</sub>. The reaction mixture was combined with the rinses, and the resulting solution was analyzed by <sup>1</sup>H NMR using trimethoxybenzene as an external standard.

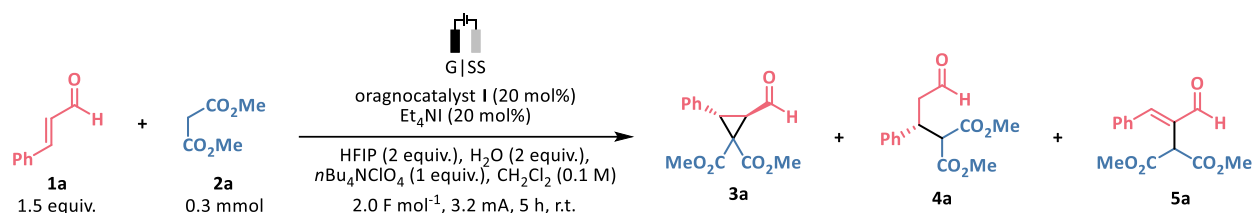

| Entry | Deviation from reaction conditions                                                                     | NMR yield, % <sup>a</sup> |           |           | d.r. of <b>3a</b> <sup>b</sup> |
|-------|--------------------------------------------------------------------------------------------------------|---------------------------|-----------|-----------|--------------------------------|
|       |                                                                                                        | <b>3a</b>                 | <b>4a</b> | <b>5a</b> |                                |
| 1     | None                                                                                                   | 59                        | -         | 12        | >20:1                          |
| 2     | 10 mol% of <b>I</b>                                                                                    | 37                        | -         | -         | >20:1                          |
| 3     | 30 mol% of <b>I</b>                                                                                    | 48                        | -         | 22        | >20:1                          |
| 4     | <i>n</i> Bu <sub>4</sub> NBF <sub>4</sub> or <i>n</i> Bu <sub>4</sub> NPF <sub>6</sub> as electrolytes | 55                        | -         | 14-18     | >20:1                          |
| 5     | 1 equiv. of <b>1a</b> , 1 equiv. of <b>2a</b>                                                          | 49                        | -         | 8         | >20:1                          |
| 6     | 3 equiv. of <b>1a</b> , 1 equiv. of <b>2a</b>                                                          | 53                        | 6         | -         | >20:1                          |
| 7     | EtOH (2 equiv.) instead of HFIP                                                                        | 39                        | -         | 7         | >20:1                          |
| 8     | EtOH (2 equiv.) instead of H <sub>2</sub> O                                                            | 47                        | 5         | 10        | >20:1                          |
| 9     | 1 equiv. of H <sub>2</sub> O                                                                           | 17                        | 27        | 6         | >20:1                          |
| 10    | 4 equiv. of H <sub>2</sub> O                                                                           | 50                        | -         | 6         | >20:1                          |
| 11    | Constant potential, 2 V, 20 h                                                                          | 48                        | -         | 17        | >20:1                          |
| 13    | At 10 °C or at 35 °C                                                                                   | 33-49                     | -         | 0-17      | >20:1                          |
| 14    | At 0 °C, 2 F mol <sup>-1</sup> , 1 mA, 16 h,                                                           | 53                        | -         | 6         | >20:1                          |
| 15    | CH <sub>2</sub> Cl <sub>2</sub> 1:1 EtOH as solvent                                                    | 29                        | -         | -         | >20:1                          |
| 16    | With dimethoxybiphenyl (50 mol %), RVC cathode, 2.5 F mol <sup>-1</sup> , 3.3 mA, 6 h                  | 63                        | -         | 13        | >20:1                          |

**Table S2.** <sup>a</sup>Yields were determined by <sup>1</sup>H NMR analysis of the crude reaction mixture using trimethoxybenzene as an internal standard. <sup>b</sup>Diastereomeric ratio of **3a** was determined by <sup>1</sup>H NMR analysis of the crude reaction mixture.

### 2.3. Screening of organocatalysts

Proline-based organocatalyst (**I-IX**) (0.06 mmol, 20 mol%), TBAClO<sub>4</sub> (0.3 mmol, 1 equiv., 102.6 mg), TEAI (0.06 mmol, 20 mol%, 15.4 mg) were dissolved in CH<sub>2</sub>Cl<sub>2</sub> (0.1 M, 3 mL). To the resulting solution, HFIP (0.6 mmol, 2 equiv., 63.0 μL), H<sub>2</sub>O (0.6 mmol, 2 equiv., 10.8 μL), cinnamic aldehyde (0.45 mmol, 1.5 equiv., 57 μL) and dimethyl malonate (0.3 mmol, 1 equiv., 34 μL) were sequentially added. The reaction vessel was sealed with a Teflon cap equipped with stainless steel and graphite electrodes (gap between electrodes of 0.5 cm) and flushed with Ar for 5 minutes. The vial was then connected to a power supply, and the reaction mixture was electrolyzed under a constant current of 3.2 mA for 5 hours while stirring at 800 rpm. After completion of the reaction, the cap was removed, and the electrodes were rinsed with CH<sub>2</sub>Cl<sub>2</sub>. The reaction mixture was combined with the rinses, and the resulting solution was analyzed by <sup>1</sup>H NMR using trimethoxybenzene as an external standard.

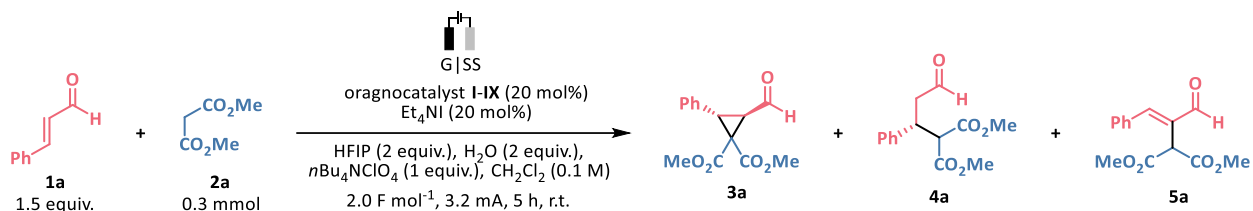

| Entry    | Organocatalyst | NMR yield, % <sup>a</sup> |           |           | d.r. of <b>3a</b> <sup>b</sup> | ee of <b>3a</b> , % <sup>c</sup> |
|----------|----------------|---------------------------|-----------|-----------|--------------------------------|----------------------------------|
|          |                | <b>3a</b>                 | <b>4a</b> | <b>5a</b> |                                |                                  |
| <b>1</b> | Cat. I         | 59                        | -         | 12        | >20:1                          | 96                               |
| <b>2</b> | Cat. II        | 46                        | -         | 2         | >20:1                          | 86                               |
| <b>3</b> | Cat. III       | 41                        | 8         | 10        | >20:1                          | n.d.                             |
| <b>4</b> | Cat. IV        | 38                        | -         | 8         | >20:1                          | 82                               |
| <b>5</b> | Cat. V         | 39                        | -         | 5         | >20:1                          | 92                               |
| <b>6</b> | Cat. VI        | 49                        | -         | 7         | >20:1                          | 70                               |
| <b>7</b> | Cat. VII       | 11                        | -         | -         | >20:1                          | n.d.                             |
| <b>8</b> | Cat. VIII      | 8                         | -         | -         | >20:1                          | n.d.                             |
| <b>9</b> | Cat. IX        | 21                        | -         | -         | >20:1                          | n.d.                             |

**Table S3.** <sup>a</sup>Yields were determined by <sup>1</sup>H NMR analysis of the crude reaction mixture using trimethoxybenzene as an internal standard. <sup>b</sup>Diastereomeric ratio of **3a** was determined by <sup>1</sup>H NMR analysis of the crude reaction mixture. n.d.: not determined. <sup>c</sup>Enantiomeric ratio of **3a** was determined by chiral HPLC analysis.

### 3. Effect of temperature on reaction outcome

Organocatalyst I (0.06 mmol, 20 mol%, 19.5 mg), TBAClO<sub>4</sub> (0.3 mmol, 1 equiv., 102.6 mg), TEAI (0.06 mmol, 20 mol%, 15.4 mg) were dissolved in CH<sub>2</sub>Cl<sub>2</sub> (0.1 M, 3 mL). To the resulting solution, HFIP (0.6 mmol, 2 equiv., 63.0 μL), H<sub>2</sub>O (0.6 mmol, 2 equiv., 10.8 μL), (*E*)-3-(4-methoxyphenyl)acrylaldehyde (0.45 mmol, 1.5 equiv., 73 mg) and dimethyl malonate (0.3 mmol, 1 equiv., 34 μL) were sequentially added. The reaction vessel was sealed with a Teflon cap equipped with stainless steel and graphite electrodes (gap between electrodes of 0.5 cm) and flushed with Ar for 5 minutes. The vial was then connected to a power supply, and the reaction mixture was electrolyzed under a constant current for the defined period (1-8 h at r.t., 10-48 h at 0 °C) while stirring at 800 rpm. After completion of the reaction, the cap was removed, and the electrodes were rinsed with CH<sub>2</sub>Cl<sub>2</sub>. The reaction mixture was combined with the rinses, and the resulting solution was analyzed by <sup>1</sup>H NMR using trimethoxybenzene as an external standard. Each column on the graph (Figure S3) corresponds to the result of a distinct experiment.

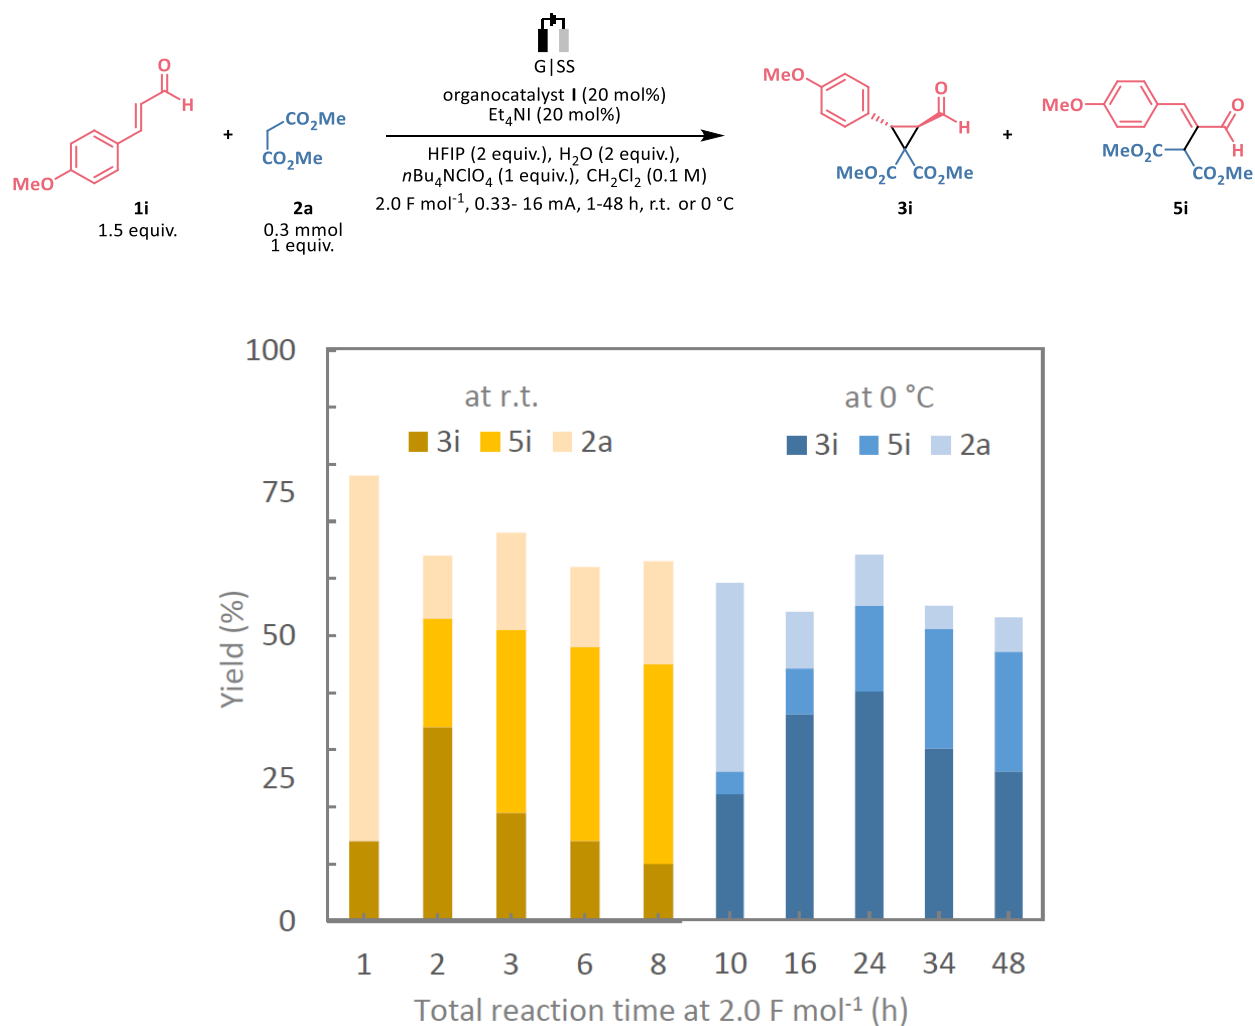

**Figure S3.** The outcome of the reaction between **1i** and **2a** at varying temperatures and reaction times.



### 3. Kinetic studies of the model reaction

Organocatalyst **1** (0.06 mmol, 20 mol%, 19.5 mg), TBAClO<sub>4</sub> (0.3 mmol, 1 equiv., 102.6 mg) and TEAI (0.06 mmol, 20 mol%, 15.4 mg) were dissolved in CH<sub>2</sub>Cl<sub>2</sub> (0.1 M, 3 mL). To the resulting solution, HFIP (0.6 mmol, 2 equiv., 63.0 μL), H<sub>2</sub>O (0.6 mmol, 2 equiv., 10.8 μL), cinnamic aldehyde (0.45 mmol, 1.5 equiv., 57 μL), dimethyl malonate (0.3 mmol, 1 equiv., 34 μL) and the internal standard dimethylacetamide (0.15 mmol, 14 μL) were sequentially added. The reaction vessel was sealed with a Teflon cap equipped with stainless steel and graphite electrodes (gap between electrodes of 0.5 cm) and flushed with Ar for 5 minutes. The vial was then connected to a power supply, and the reaction mixture was electrolyzed under a constant current of 2.7 mA for 7 hours while stirring at 800 rpm. The progress of the reaction was monitored by <sup>1</sup>H NMR by withdrawing 50 μL samples from the reaction mixture after defined periods and diluting them with CDCl<sub>3</sub>.

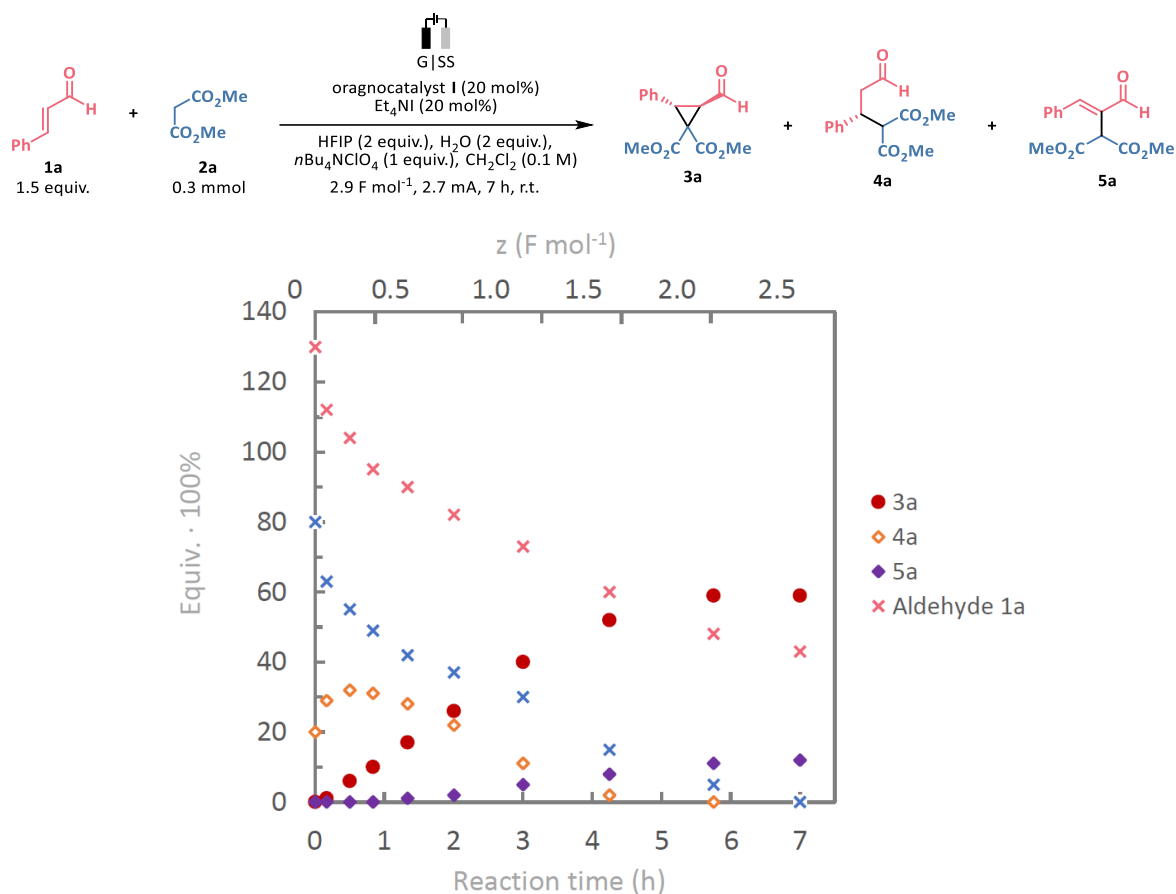

**Figure S4.** Kinetic studies of the model reaction.

Comment: Kinetics experiments for model reaction of cinnamic aldehyde **1a** and dimethyl malonate **2a** was performed, where we investigated the formation of intermediate **4a** (product of the first addition of malonate to iminium ion), cyclopropane **3a**, byproduct **5a** and the conversions of starting compounds over the addition of electrons and, thus, reaction time. Even before turning on the electricity, intermediate **4a** is formed in 20% yield and over the addition of 0.2 F mol<sup>-1</sup> electrons the amount of **4a** continues to increase to 30%, together with the start of the formation of product **3**. Then **4a** degrades over time and it is fully consumed at 1.7 F mol<sup>-1</sup>, however the amount of **3a** still increases together with its byproduct **5a**. When performing the reaction with an excess of electrons over 2 F mol<sup>-1</sup>, cyclopropane **3a** does not form anymore and even starts to degrade to **5a**.

#### 4. Kinetic studies of 4a cyclopropanation

Organocatalyst I (0.06 mmol, 20 mol%, 19.5 mg), TBAClO<sub>4</sub> (0.3 mmol, 1 equiv., 102.6 mg) and TEAI (0.06 mmol, 20 mol%, 15.4 mg) were dissolved in CH<sub>2</sub>Cl<sub>2</sub> (0.1 M, 3 mL). To the resulting solution, HFIP (0.6 mmol, 2 equiv., 63.0 μL), H<sub>2</sub>O (0.6 mmol, 2 equiv., 10.8 μL), **4a** (0.3 mmol, 1 equiv., 79.3 mg) and the internal standard dimethylacetamide (0.15 mmol, 14 μL) were sequentially added. The reaction vessel was sealed with a Teflon cap equipped with stainless steel and graphite electrodes (gap between electrodes of 0.5 cm) and flushed with Ar for 5 minutes. The vial was then connected to a power supply, and the reaction mixture was electrolyzed under a constant current of 3.2 mA for 5 hours while stirring at 800 rpm. The progress of the reaction was monitored by <sup>1</sup>H NMR by withdrawing 50 μL samples from the reaction mixture after defined periods and diluting them with CDCl<sub>3</sub>.

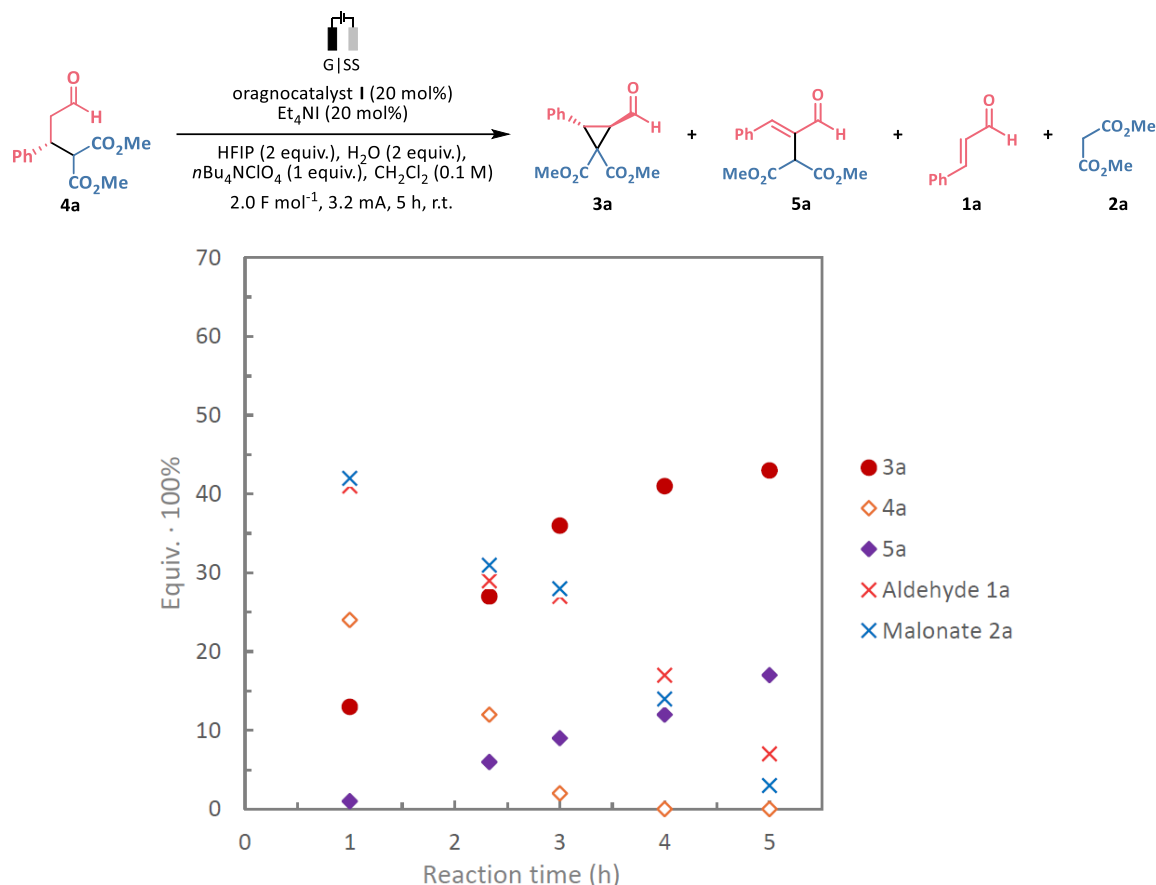

Figure S5. Kinetic studies of the control reaction from **4a**.

## 5. Cyclic voltammetry

The cyclic voltammetry experiments were conducted using a three-electrode cell. For analysis, a PalmSens EmStat4LR potentiostat was utilized, with a glassy carbon disc (diameter: 3 mm) serving as the working electrode, and a platinum wire as the counter electrode. Prior to each experiment, the glassy carbon disc was polished with 0.05  $\mu\text{m}$  alumina slurry in distilled water. Ag wire in 10 mM solution of  $\text{AgNO}_3$  in  $n\text{Bu}_4\text{NPF}_6$  (0.1 M) in acetonitrile was used as a reference electrode and this compartment was separated from the rest of the cell with a frit. Anhydrous acetonitrile was stored over molecular sieves and used as the solvent. Tetrabutylammonium hexafluorophosphate was recrystallized from ethanol prior to use.

The analyte was dissolved in the electrolyte (10 mM solution in 0.1 M  $n\text{Bu}_4\text{NPF}_6$  in acetonitrile, for  $\text{Et}_4\text{NI}$ ,  $n\text{Bu}_4\text{NBr}$  and TEMPO 2 mM solution). Before measurements, the electrochemical cell was flushed with argon, charged with 3 mL of the analyte solution, and flushed with a stream of argon for 5 min. The measurements were conducted at a scan rate of 100 mV/s. The measurements were started at the open circuit potential (OCP). The range of the scanned potentials was  $-0.5 / +1.5$  V. CV diagrams are presented in IUPAC plotting convention. The CV spectra were realigned with respect to  $\text{Fc}^+/\text{Fc}$  couple. Half-wave potentials and  $E_p$  (peak potentials) for all the compounds were determined with PSTrace5 software.

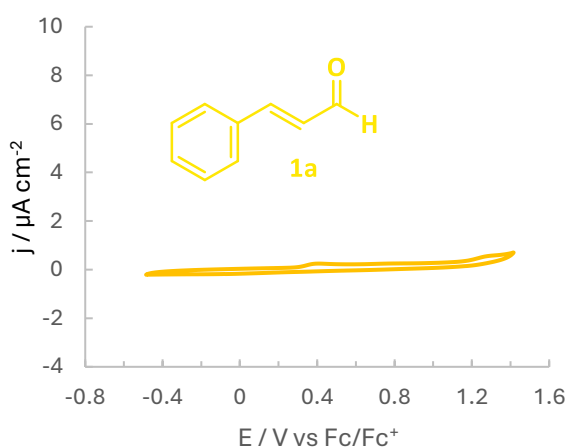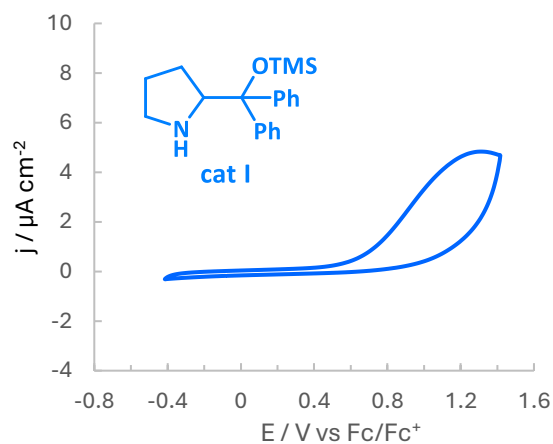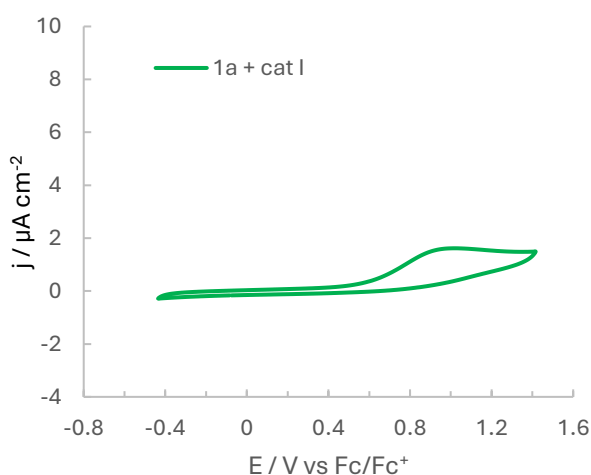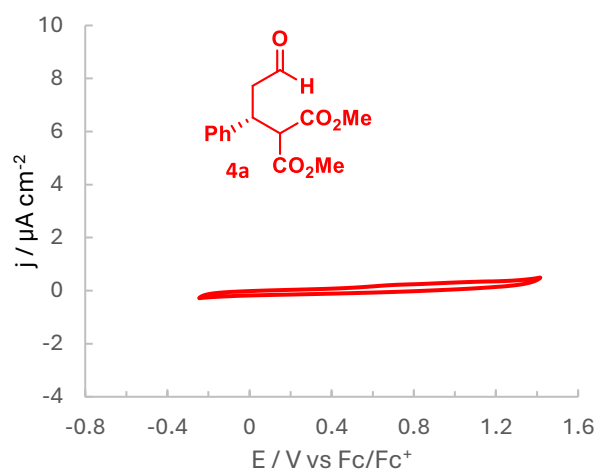

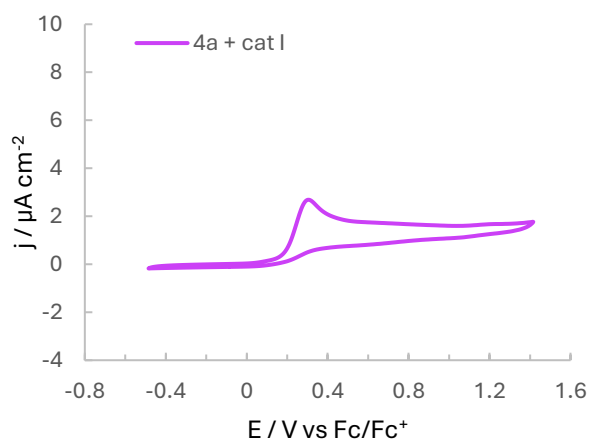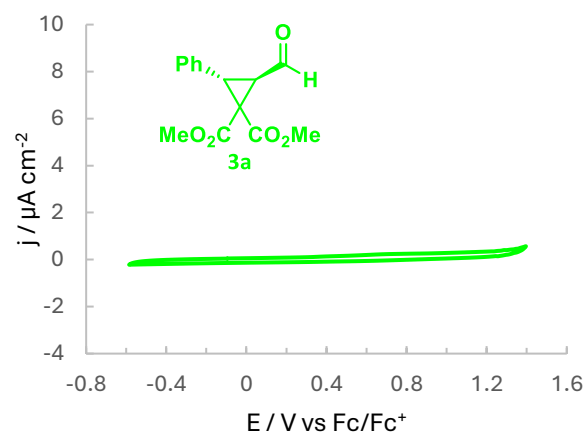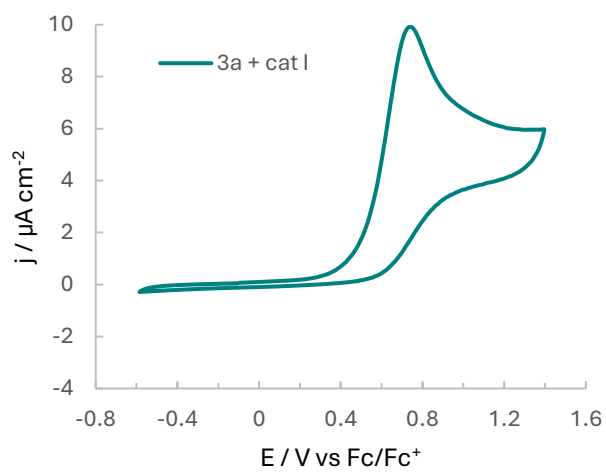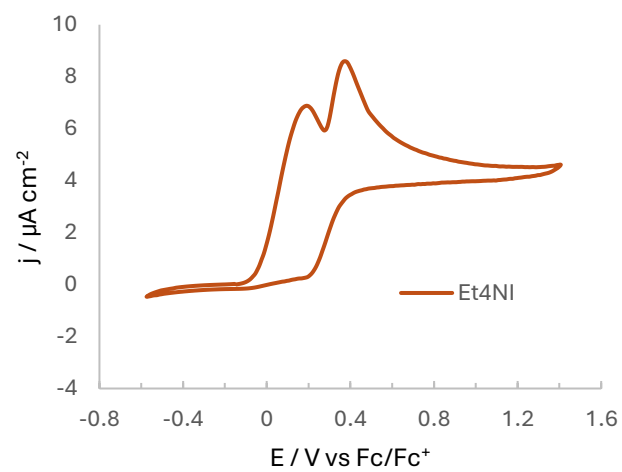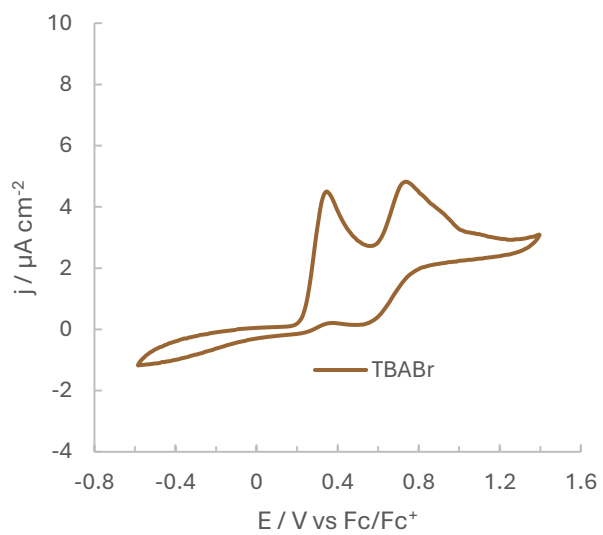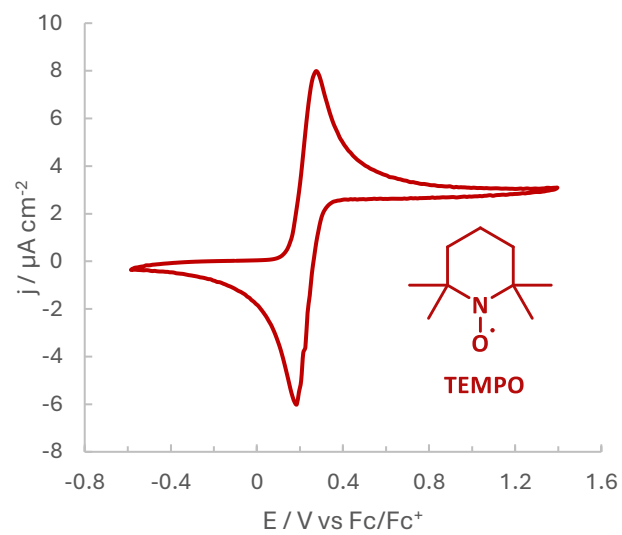

## 6. Substrate scope limitations

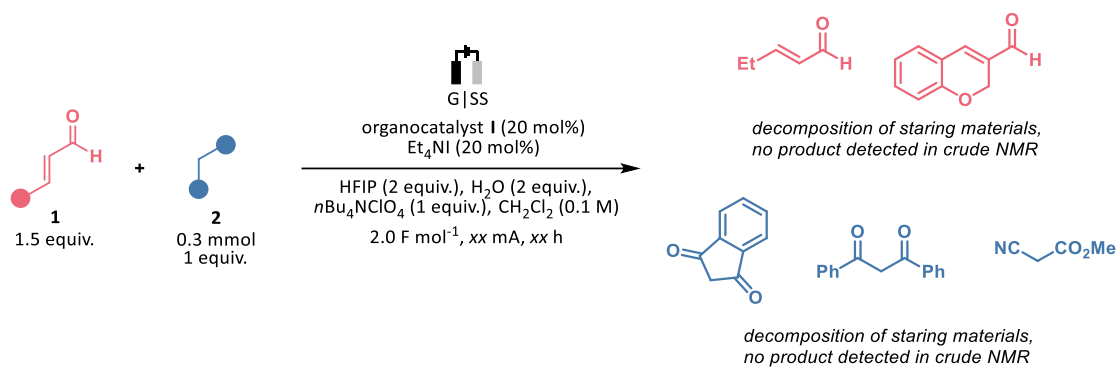

**Scheme S1.** Substrate scope limitations.

## 7. Alternative mechanism

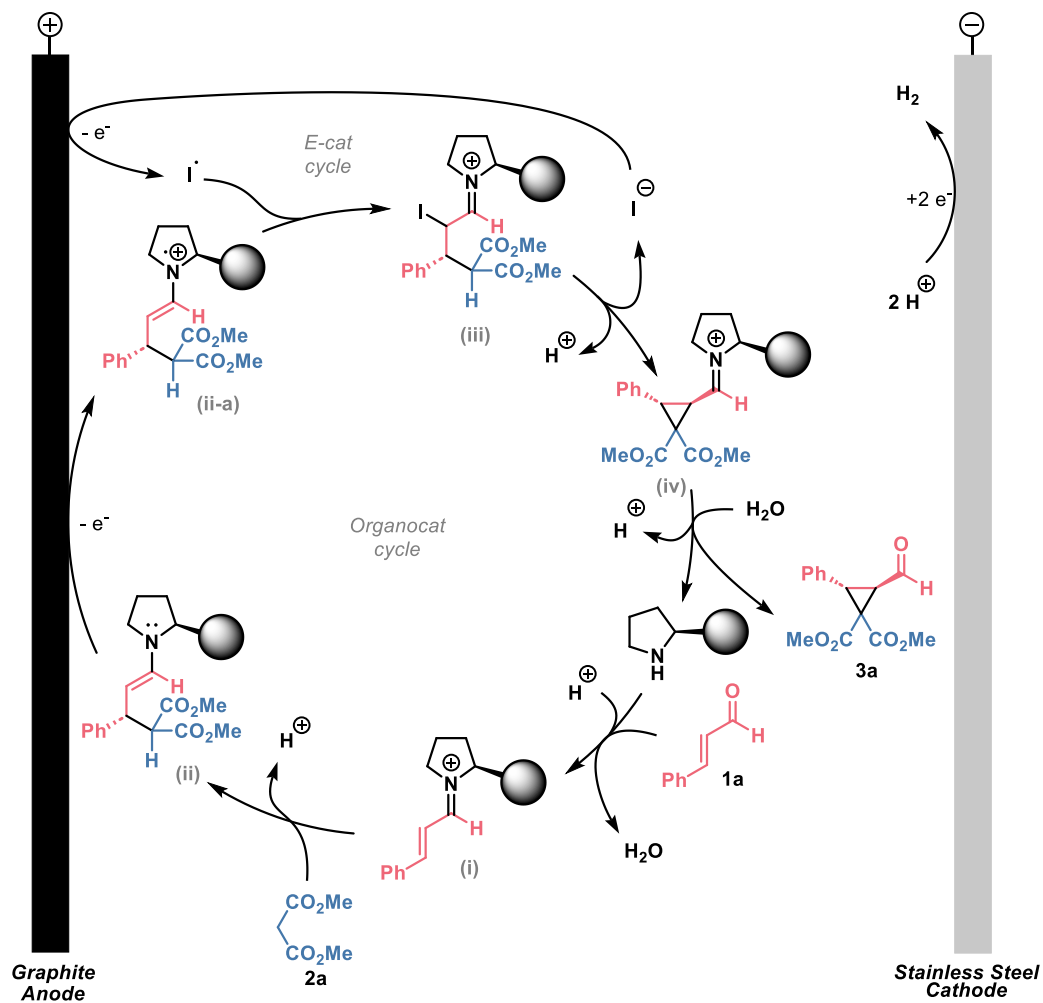

**Scheme S2.** Alternative mechanism of the reaction through anodic oxidation of enamine intermediate (ii) to radical cation which captures iodine radical formed in electrocatalytic cycle.

## 8. General procedure

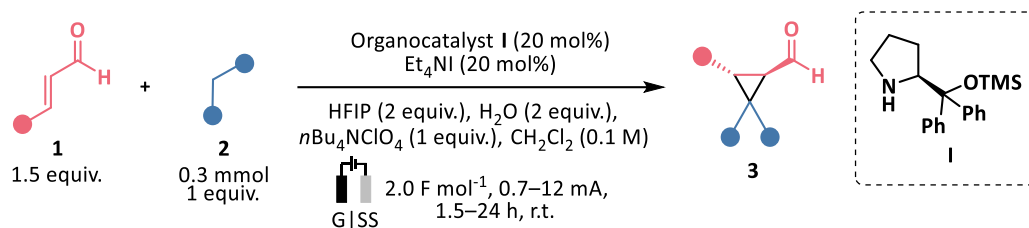

Organocatalyst **I** (0.06 mmol, 20 mol%, 19.5 mg), TBAClO<sub>4</sub> (0.3 mmol, 1 equiv., 102.6 mg), TEAI (0.06 mmol, 20 mol%, 15.4 mg) were dissolved in CH<sub>2</sub>Cl<sub>2</sub> (0.1 M, 3 mL). To the resulted solution were sequentially added HFIP (0.6 mmol, 2 equiv., 63.0 μL), H<sub>2</sub>O (0.6 mmol, 2 equiv., 10.8 μL), Michael donor (0.3 mmol, 1 equiv.) and α,β-unsaturated aldehyde (0.45 mmol, 1.5 equiv.). The reaction vessel was sealed with a Teflon cap equipped with stainless steel and graphite electrodes (gap between electrodes of 0.5 cm) and flushed with Ar for 5 min. Then the vial was connected to a power supply and the reaction mixture was electrolyzed under a constant current for a defined time while being stirred at 800 rpm. After the completion of the reaction, the cap was removed, and the electrodes were rinsed with CH<sub>2</sub>Cl<sub>2</sub>. The reaction mixture was combined with rinses and concentrated under the reduced pressure. The residue was then purified by flash chromatography to yield the corresponding cyclopropane product.

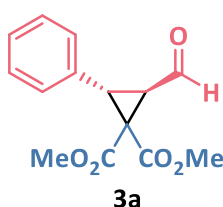

**Dimethyl (2*R*,3*S*)-2-formyl-3-phenylcyclopropane-1,1-dicarboxylate (3a)**: synthesized according to general procedure from (*E*)-cinnamaldehyde and dimethylmalonate at 3.2 mA for 5 hours. Purified by column chromatography on silica gel (eluent: 0 → 5% Et<sub>2</sub>O in PE/CH<sub>2</sub>Cl<sub>2</sub> = 1:1) to give **3a** (45 mg, 0.17 mmol) as a yellowish oil in 57% yield. <sup>1</sup>H NMR (400 MHz, CDCl<sub>3</sub>) δ 9.47 (d, *J* = 4.5 Hz, 1H), 7.30 – 7.16 (m, 5H), 3.83 – 3.78 (m, 4H), 3.44 (s, 3H), 3.37 (dd, *J* = 7.5, 4.5 Hz, 1H); <sup>13</sup>C NMR (125 MHz, CDCl<sub>3</sub>) δ 196.2, 166.6, 165.2, 132.3, 128.6, 128.5, 128.2, 53.5, 53.0, 44.7, 38.4, 35.8. HPLC (Chiralpak AS-H, i-PrOH/hexane = 10/90, flow rate = 1 mL/min, λ = 210 nm): *t*<sub>major</sub> = 10.8 min, *t*<sub>minor</sub> = 12.4 min, *ee* = 96%. [α]<sub>D</sub><sup>22</sup> = - 60.5 (c = 0.12 in CHCl<sub>3</sub>). Spectral data are in agreement with previously reported.<sup>1</sup>

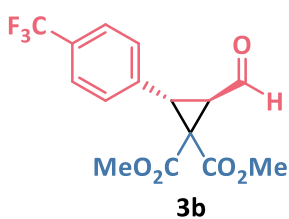

**Dimethyl (2*R*,3*S*)-2-formyl-3-(4-(trifluoromethyl)phenyl)cyclopropane-1,1-dicarboxylate (3b)**: synthesized according to general procedure from (*E*)-3-(4-(trifluoromethyl)phenyl)acrylaldehyde and dimethylmalonate at 4.4 mA for 4 hours. Purified by column chromatography on silica gel (eluent: 0 → 2% Et<sub>2</sub>O in PE/CH<sub>2</sub>Cl<sub>2</sub> = 1:1) to give **3b** (63 mg, 0.19 mmol) as a yellowish oil in 64% yield. <sup>1</sup>H NMR (400 MHz, CDCl<sub>3</sub>) δ 9.55 (d, *J* = 4.1 Hz, 1H), 7.57 (d, *J* = 8.1 Hz, 2H), 7.39 – 7.34 (m, 2H), 3.85 – 3.81 (m, 4H), 3.50 (s, 3H), 3.43 (dd, *J* = 7.6, 4.1 Hz, 1H). <sup>13</sup>C NMR (101 MHz, CDCl<sub>3</sub>) δ 195.5, 166.2, 165.0, 136.5, 130.49 (q, <sup>2</sup>*J*<sub>CF</sub> = 32.7 Hz), 129.1, 125.6 (q, <sup>3</sup>*J*<sub>CF</sub> = 3.8 Hz), 124.01 (q, <sup>1</sup>*J*<sub>CF</sub> = 272.1 Hz, CF<sub>3</sub>), 53.6, 53.3, 44.8, 38.1, 35.2. HPLC (Chiralpak OJ-H, i-PrOH/hexane = 4/96, flow rate = 1 mL/min, λ = 210 nm): *t*<sub>major</sub> = 28.6 min, *t*<sub>minor</sub> = 41.2 min, *ee* = 96%. [α]<sub>D</sub><sup>22</sup> = - 45.9 (c = 0.17 in CHCl<sub>3</sub>). Spectral data are in agreement with previously reported.<sup>1</sup>

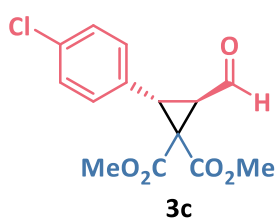

**Dimethyl (2*R*,3*S*)-2-(4-chlorophenyl)-3-formylcyclopropane-1,1-dicarboxylate (3c)**: synthesized according to general procedure from (*E*)-3-(4-(chlorophenyl)acrylaldehyde and dimethylmalonate at 4.4 mA for 4 hours. Purified by column chromatography on silica gel (eluent: 0 → 3% Et<sub>2</sub>O in PE/CH<sub>2</sub>Cl<sub>2</sub> = 1:1) to give **3c** (47 mg, 0.16 mmol) as a yellowish oil in 53% yield. <sup>1</sup>H NMR (400 MHz, CDCl<sub>3</sub>) δ 9.50 (d, *J* = 4.2 Hz, 1H), 7.31 – 7.24 (m, 2H), 7.21 – 7.13 (m, 2H), 3.82 (s, 3H), 3.76 (d, *J* = 7.5 Hz, 1H), 3.51 (s, 3H), 3.36 (dd, *J* = 7.5, 4.2 Hz, 1H). <sup>13</sup>C NMR (101 MHz, CDCl<sub>3</sub>) δ 195.8, 166.4, 165.1, 134.2, 130.8, 130.0, 128.9, 53.6, 53.2, 44.7, 38.3, 35.1. HPLC (Chiralpak OJ-H, i-PrOH/hexane = 10/90, flow rate = 1 mL/min, λ = 210 nm): *t*<sub>major</sub> = 22.5 min, *t*<sub>minor</sub> = 32.9 min, *ee* = 98%. [α]<sub>D</sub><sup>22</sup> = - 32.9 (c = 0.26 in CHCl<sub>3</sub>). Spectral data are in agreement with previously reported.<sup>2</sup>

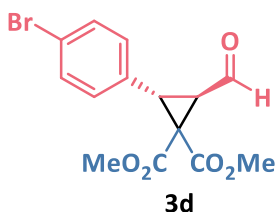

**Dimethyl (2R,3S)-2-(4-bromophenyl)-3-formylcyclopropane-1,1-dicarboxylate (3d):** synthesized according to general procedure from (*E*)-3-(4-(bromophenyl)acrylaldehyde and dimethylmalonate at 5 mA for 3.5 hours. Purified by column chromatography on silica gel (eluent: 0 → 2% Et<sub>2</sub>O in PE/CH<sub>2</sub>Cl<sub>2</sub> = 1:1) to give **3d** (63 mg, 0.18 mmol) as a yellowish oil in 62% yield. <sup>1</sup>H NMR (400 MHz, CDCl<sub>3</sub>) δ 9.50 (d, *J* = 4.2 Hz, 1H), 7.46 – 7.39 (m, 2H), 7.13 – 7.07 (m, 2H), 3.82 (s, 3H), 3.75 (d, *J* = 7.5 Hz, 1H), 3.51 (s, 3H), 3.36 (dd, *J* = 7.5, 4.2 Hz, 1H). <sup>13</sup>C NMR (101 MHz, CDCl<sub>3</sub>) δ 195.7, 166.4, 165.0, 131.8, 131.4, 130.3, 122.4, 53.6, 53.2, 44.7, 38.2, 35.2. HPLC (Chiralpak OJ-H, *i*-PrOH/hexane = 10/90, flow rate = 1 mL/min, λ = 210 nm): *t*<sub>major</sub> = 26.3 min, *t*<sub>minor</sub> = 40.0 min, *ee* = 98%. [α]<sub>D</sub><sup>22</sup> = - 52.9 (c = 0.16 in CHCl<sub>3</sub>). HRMS (ESI) *m/z* [M+Na]<sup>+</sup> calcd for C<sub>14</sub>H<sub>13</sub>BrO<sub>5</sub>Na<sup>+</sup> 362.9839, found 362.9833.

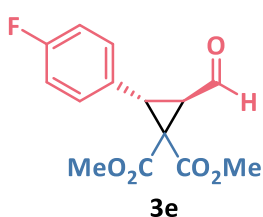

**Dimethyl (2R,3S)-2-(4-fluorophenyl)-3-formylcyclopropane-1,1-dicarboxylate (3e):** synthesized according to general procedure from (*E*)-3-(4-(fluorophenyl)acrylaldehyde and dimethylmalonate at 4.4 mA for 4 hours. Purified by column chromatography on silica gel (eluent: 0 → 2% Et<sub>2</sub>O in PE/CH<sub>2</sub>Cl<sub>2</sub> = 1:1) to give **3e** (47 mg, 0.17 mmol) as a yellowish oil in 56% yield. <sup>1</sup>H NMR (400 MHz, CDCl<sub>3</sub>) δ 9.50 (d, *J* = 4.3 Hz, 1H), 7.24 – 7.17 (m, 2H), 7.03 – 6.95 (m, 2H), 3.82 (s, 3H), 3.80 – 3.76 (m, 1H), 3.50 (s, 3H), 3.36 (dd, *J* = 7.5, 4.3 Hz, 1H). <sup>13</sup>C NMR (101 MHz, CDCl<sub>3</sub>) δ 195.9, 166.5, 165.1, 162.6 (d, *J* = 247.5 Hz), 130.3 (d, *J* = 8.4 Hz), 128.1 (d, *J* = 3.1 Hz), 115.7 (d, *J* = 21.8 Hz), 53.5, 53.1, 44.7, 38.5, 35.0. HPLC (Chiralpak OJ-H, *i*-PrOH/hexane = 3/97, flow rate = 1 mL/min, λ = 210 nm): *t*<sub>major</sub> = 38.8 min, *t*<sub>minor</sub> = 54.3 min, *ee* = 97%. [α]<sub>D</sub><sup>22</sup> = - 57.4 (c = 0.16 in CHCl<sub>3</sub>). Spectral data are in agreement with previously reported.<sup>2</sup>

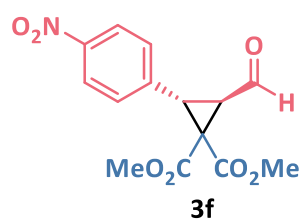

**Dimethyl (2R,3S)-2-formyl-3-(4-nitrophenyl)cyclopropane-1,1-dicarboxylate (3f):** synthesized according to general procedure from (*E*)-3-(4-(nitrophenyl)acrylaldehyde and dimethylmalonate at 3.2 mA for 5 hours. Purified by column chromatography on silica gel (eluent: 0 → 7% Et<sub>2</sub>O in PE/CH<sub>2</sub>Cl<sub>2</sub> = 1:1) to give **3f** (55 mg, 0.18 mmol) as a yellowish oil in 60% yield. <sup>1</sup>H NMR (400 MHz, CDCl<sub>3</sub>) δ 9.59 (d, *J* = 3.8 Hz, 1H), 8.22 – 8.10 (m, 2H), 7.47 – 7.39 (m, 2H), 3.85 (s, 4H), 3.53 (s, 3H), 3.47 (dd, *J* = 7.6, 3.8 Hz, 1H); <sup>13</sup>C NMR (125 MHz, CDCl<sub>3</sub>): δ <sup>13</sup>C NMR (101 MHz, CDCl<sub>3</sub>) δ 195.1, 165.9, 164.9, 147.8, 139.8, 129.7, 123.8, 53.8, 53.5, 45.0, 38.2, 35.1; HPLC (*ee* was determined after converted to the corresponding enone with Ph<sub>3</sub>P=CHCO<sub>2</sub>Et,<sup>2</sup> Chiralpak AS-H, *i*PrOH/hexane = 10/90, flow rate = 1 mL/min, λ = 254 nm): *t*<sub>major</sub> = 37.2 min, *t*<sub>minor</sub> = 27.9 min, *ee* = 94%. [α]<sub>D</sub><sup>22</sup> = - 46.7 (c = 0.20 in CHCl<sub>3</sub>). Spectral data are in agreement with previously reported.<sup>2</sup>

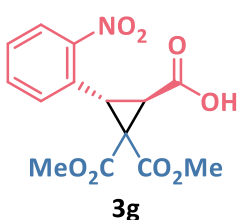

**Dimethyl (2R,3S)-2-formyl-3-(2-nitrophenyl)cyclopropane-1,1-dicarboxylate (3g):** synthesized according to general procedure from (*E*)-3-(2-(nitrophenyl)acrylaldehyde and dimethylmalonate at 3.2 mA for 5 hours. Purified by column chromatography on silica gel (eluent: 0 → 7% Et<sub>2</sub>O in PE/CH<sub>2</sub>Cl<sub>2</sub> = 1:1) to give **3g** (62 mg, 0.2 mmol) as a yellowish oil in 67% yield. <sup>1</sup>H NMR (400 MHz, CDCl<sub>3</sub>) δ 9.56 (d, *J* = 4.5 Hz, 1H), 8.05 (dd, *J* = 8.1, 1.4 Hz, 1H), 7.62 – 7.56 (m, 1H), 7.53 – 7.47 (m, 1H), 7.38 – 7.33 (m, 1H), 4.28 (d, *J* = 7.8 Hz, 1H), 3.85 (s, 3H), 3.49 (s, 3H), 3.22 (dd, *J* = 7.8, 4.5 Hz, 1H). <sup>13</sup>C NMR (101 MHz, CDCl<sub>3</sub>) δ 195.6, 166.1, 165.4, 149.9, 133.6, 131.4, 129.6, 128.5, 125.2, 53.7, 53.4, 43.4, 39.2, 34.3. HPLC (Chiralpak AS-H, *i*-PrOH/hexane = 25/75, flow rate = 0.5 mL/min, λ = 210 nm): *t*<sub>major</sub> = 14.0 min, *t*<sub>minor</sub> = 31.6 min, *ee* = 97%. [α]<sub>D</sub><sup>22</sup> = + 38.1 (c = 0.14 in CHCl<sub>3</sub>). Spectral data are in agreement with previously reported.<sup>2</sup>

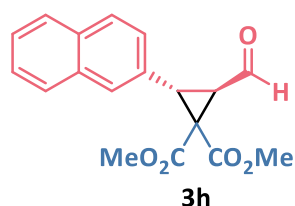

**Dimethyl (2R,3S)-2-formyl-3-(naphthalen-2-yl)cyclopropane-1,1-dicarboxylate (3h):** synthesized according to general procedure from (*E*)-3-(naphthalen-2-yl)acrylaldehyde and dimethylmalonate at 3.2 mA for 5 hours. Purified by column chromatography on silica gel (eluent: 0 → 5% Et<sub>2</sub>O in PE/CH<sub>2</sub>Cl<sub>2</sub> = 1:1) to give **3h** (39 mg, 0.12 mmol) as a yellowish oil in 42% yield. <sup>1</sup>H NMR (400 MHz, CDCl<sub>3</sub>) δ 9.49 (d, *J* = 4.4 Hz, 1H), 7.77 – 7.68 (m, 3H), 7.62 (s, 1H), 7.44 – 7.38 (m, 2H), 7.28 (dd, *J* = 8.5, 1.9 Hz, 1H), 3.91 (dd, *J* = 7.5, 1.0 Hz, 1H), 3.79 (s, 3H), 3.46 (dd, *J* = 7.5, 4.5 Hz, 1H),



3.35 (s, 3H).  $^{13}\text{C NMR}$  (101 MHz,  $\text{CDCl}_3$ )  $\delta$  196.2, 166.7, 165.2, 133.2, 133.0, 129.7, 128.4, 128.0, 127.8, 127.7, 126.6, 126.5, 126.2, 53.6, 53.1, 44.9, 38.6, 36.0.  $\text{HPLC}$  (Chiralpak OJ-H, *i*-PrOH/hexane = 5/95, flow rate = 1 mL/min,  $\lambda$  = 230 nm):  $t_{\text{major}}$  = 28.5 min,  $t_{\text{minor}}$  = 61.0 min, *ee* = 97%.  $[\alpha]_{\text{D}}^{22}$  = - 66.1 (*c* = 0.16 in  $\text{CHCl}_3$ ).  $\text{HRMS}$  (ESI) *m/z*  $[\text{M}+\text{Na}]^+$  calcd for  $\text{C}_{18}\text{H}_{16}\text{O}_5\text{Na}^+$  335.0890, found 335.0889.

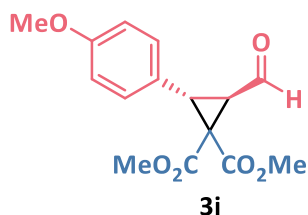

**Dimethyl (2*R*,3*S*)-2-formyl-3-(4-methoxyphenyl)cyclopropane-1,1-dicarboxylate (3i):** synthesized according to general procedure from (*E*)-3-(4-methoxyphenyl)acrylaldehyde and dimethylmalonate at 3.2 mA for 5 hours. Purified by column chromatography on silica gel (eluent: 2 → 5%  $\text{Et}_2\text{O}$  in  $\text{PE}/\text{CH}_2\text{Cl}_2$  = 1:1) to give **3i** (35 mg, 0.12 mmol) as a yellowish oil in 40% yield.  $^1\text{H NMR}$  (400 MHz,  $\text{CDCl}_3$ )  $\delta$  9.47 (d, *J* = 4.6 Hz, 1H), 7.17 – 7.12 (m, 2H), 6.85 – 6.80 (m, 2H), 3.82 (s, 3H), 3.79 – 3.76 (m, 4H), 3.49 (s, 3H), 3.34 (dd, *J* = 7.5, 4.6 Hz, 1H).  $^{13}\text{C NMR}$  (101 MHz,  $\text{CDCl}_3$ )  $\delta$  196.3, 166.8, 165.3, 159.5, 129.7, 124.1, 114.0, 55.4, 53.5, 53.1, 44.7, 38.7, 35.4.  $\text{HPLC}$  (Chiralpak OJ-H, *i*-PrOH/hexane = 10/90, flow rate = 1 mL/min,  $\lambda$  = 210 nm):  $t_{\text{major}}$  = 49.3 min,  $t_{\text{minor}}$  = 52.9 min, *ee* = 98%.  $[\alpha]_{\text{D}}^{22}$  = - 49.7 (*c* = 0.4 in  $\text{CHCl}_3$ ). Spectral data are in agreement with previously reported.<sup>1</sup>

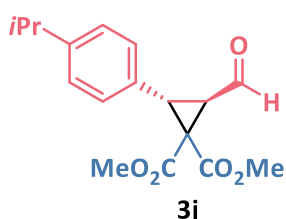

**Dimethyl (2*R*,3*S*)-2-formyl-3-(4-isopropylphenyl)cyclopropane-1,1-dicarboxylate (3j):** synthesized according to general procedure from (*E*)-3-(4-isopropylphenyl)acrylaldehyde and dimethylmalonate at 1 mA for 16 hours. Purified by column chromatography on silica gel (eluent: 0 → 2%  $\text{Et}_2\text{O}$  in  $\text{PE}/\text{CH}_2\text{Cl}_2$  = 1:1) to give **3j** (44 mg, 0.14 mmol) as a yellowish oil in 48% yield.  $^1\text{H NMR}$  (400 MHz,  $\text{CDCl}_3$ )  $\delta$  9.48 (d, *J* = 4.6 Hz, 1H), 7.19 – 7.06 (m, 4H), 3.85 – 3.75 (m, 4H), 3.47 (s, 3H), 3.36 (dd, *J* = 7.5, 4.6 Hz, 1H), 2.87 (hept, *J* = 7.0 Hz, 1H), 1.21 (d, *J* = 7.0 Hz, 6H).  $^{13}\text{C NMR}$  (101 MHz,  $\text{CDCl}_3$ )  $\delta$  196.3, 166.8, 165.3, 149.0, 129.5, 128.5, 126.7, 53.5, 53.0, 44.7, 38.6, 35.7, 33.9, 24.0.  $\text{HPLC}$  (Chiralpak OD-H, *i*-PrOH/hexane = 10/90, flow rate = 1 mL/min,  $\lambda$  = 210 nm):  $t_{\text{major}}$  = 7.3 min,  $t_{\text{minor}}$  = 13.5 min, *ee* = 98%;  $[\alpha]_{\text{D}}^{20}$  = - 47.6 (*c* = 0.18 in  $\text{CHCl}_3$ ).  $\text{HRMS}$  (ESI) *m/z*  $[\text{M}+\text{Na}]^+$  calcd for  $\text{C}_{17}\text{H}_{20}\text{O}_5\text{Na}^+$  327.1203, found 327.1202.

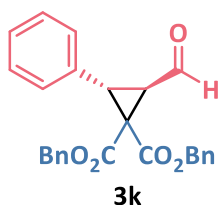

**Dibenzyl (2*R*,3*S*)-2-formyl-3-phenylcyclopropane-1,1-dicarboxylate (3k):** synthesized according to general procedure from (*E*)-cinnamaldehyde and dibenzylmalonate at 3.2 mA for 5 hours. Purified by column chromatography on silica gel (eluent: 0 → 30%  $\text{Et}_2\text{O}$  in  $\text{PE}$ ) to give **3k** (66 mg, 0.16 mmol) as a yellowish oil in 53% yield.  $^1\text{H NMR}$  (400 MHz,  $\text{CDCl}_3$ )  $\delta$  9.45 (d, *J* = 4.6 Hz, 1H), 7.37 – 7.17 (m, 15H), 6.99 – 6.92 (m, 2H), 5.27 (d, *J* = 12.2 Hz, 1H), 5.18 (d, *J* = 12.2 Hz, 1H), 4.87 (d, *J* = 12.2 Hz, 1H), 4.80 (d, *J* = 12.2 Hz, 1H), 3.86 (d, *J* = 7.6 Hz, 1H), 3.40 (dd, *J* = 7.6, 4.6 Hz, 1H).  $^{13}\text{C NMR}$  (101 MHz,  $\text{CDCl}_3$ )  $\delta$  196.0, 166.0, 164.6, 135.0, 134.8, 132.1, 128.8, 128.7, 128.7, 128.7, 128.6, 128.5, 128.4, 128.2, 68.4, 68.0, 44.9, 38.5, 35.9.  $\text{HPLC}$  (Chiralpak AD-H, *i*-PrOH/hexane = 10/90, flow rate = 1 mL/min,  $\lambda$  = 210 nm):  $t_{\text{major}}$  = 27.2 min,  $t_{\text{minor}}$  = 22.3 min, *ee* = 96%;  $[\alpha]_{\text{D}}^{22}$  = - 56.1 (*c* = 0.34 in  $\text{CHCl}_3$ ). Spectral data are in agreement with previously reported.<sup>3</sup>

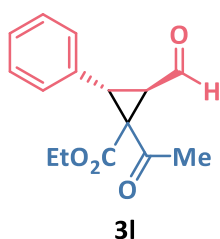

**Ethyl (2*R*,3*S*)-1-acetyl-2-formyl-3-phenylcyclopropane-1-carboxylate (3l):** synthesized as a mixture of diastereomers (2:1) according to general procedure from (*E*)-cinnamaldehyde and ethyl 3-oxobutanoate at 12 mA for 1.5 hours. Purified by column chromatography on silica gel (eluent: 0 → 20%  $\text{Et}_2\text{O}$  in  $\text{PE}$ ) to give **3l** (31 mg, 0.12 mmol) as white amorphous solid in 30% yield (major diastereomer).  $^1\text{H NMR}$  (400 MHz,  $\text{CDCl}_3$ )  $\delta$  9.51 (d, *J* = 4.7 Hz, 1H), 7.32 – 7.23 (m, 3H), 7.19 – 7.13 (m, 2H), 4.41 – 4.23 (m, 2H), 3.89 (d, *J* = 7.6 Hz, 1H), 3.49 (dd, *J* = 7.6, 4.7 Hz, 1H), 1.98 (s, 3H), 1.33 (t, *J* = 7.1 Hz, 3H).  $^{13}\text{C NMR}$  (101 MHz,  $\text{CDCl}_3$ )  $\delta$  196.5, 196.1, 167.3, 131.5, 128.8, 128.4, 128.3, 62.8, 51.8, 37.4, 36.9, 29.4, 14.2.  $\text{HPLC}$  (Chiralpak OD-H, *i*-PrOH/hexane = 10/90, flow rate = 1 mL/min,  $\lambda$  = 210 nm):  $t_{\text{major}}$  = 8.1 min,  $t_{\text{minor}}$  = 10.5 min, *ee* = 94%;  $[\alpha]_{\text{D}}^{22}$  = - 91.3 (*c* = 0.11 in  $\text{CHCl}_3$ ). Spectral data are in agreement with previously reported.<sup>4</sup>

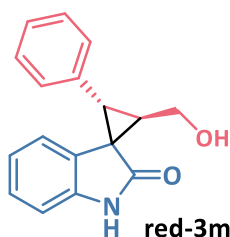

**(2*R*,3*S*)-2'-Oxo-3-phenylspiro[cyclopropane-1,3'-indoline]-2-carbaldehyde (red-3m):** synthesized according to general procedure from (*E*)-cinnamaldehyde and indolin-2-one at 4.4 mA for 4 hours at -10°C. The resulting mixture was diluted with  $\text{MeOH}$  (5 mL) and quenched with  $\text{NaBH}_4$  (1.5 mmol, 5 equiv., 56.8 mg). After stirring for 5 min,  $\text{H}_2\text{O}$  (5 mL) was added. The mixture was extracted with  $\text{CH}_2\text{Cl}_2$  (4 x 15 mL), combined organic fractions

were washed with brine (15 mL), dried over MgSO<sub>4</sub> and concentrated under reduced pressure. The residue was purified by reversed phase flash column chromatography (eluent: 10 → 60% MeCN in H<sub>2</sub>O) to give **red-3m** (33 mg, 0.12 mmol) as a yellowish oil in 41% yield as an inseparable mixture of diastereomers (3.4:1). <sup>1</sup>H NMR *major diastereomer* (400 MHz, CD<sub>3</sub>OD) δ 7.31 – 7.15 (m, 7H), 7.08 – 7.00 (m, 1H), 7.00 – 6.93 (m, 1H), 4.14 (dd, *J* = 12.0, 6.4 Hz, 1H), 3.99 (dd, *J* = 12.0, 7.9 Hz, 1H), 3.27 (d, *J* = 8.5 Hz, 1H), 2.79 (td, *J* = 8.1, 6.2 Hz, 1H). <sup>1</sup>H NMR *minor diastereomer characteristic signals* (400 MHz, MeOD) δ 6.61 (td, *J* = 7.6, 1.0 Hz, 1H), 5.99 (dd, *J* = 7.6, 1.2 Hz, 1H), 4.22 (dd, *J* = 11.7, 6.2 Hz, 1H), 2.68 (td, *J* = 7.8, 6.2 Hz, 1H). <sup>13</sup>C NMR *major diastereomer* (101 MHz, MeOD) δ 177.5, 143.1, 136.2, 130.9, 130.3, 129.9, 129.4, 128.9, 122.7, 122.1, 110.9, 60.3, 42.8, 39.5, 39.4. <sup>13</sup>C NMR *minor diastereomer* (101 MHz, MeOD) δ 179.1, 142.6, 136.2, 128.5, 128.0, 127.8, 127.6, 122.2, 121.8, 110.9, 110.5, 59.1, 41.7, 40.1, 38.2. HPLC (Chiralpak OJ-H, *i*-PrOH/hexane = 10/90, flow rate = 1 mL/min, λ = 230 nm): *major diastereomer* *t* = 36.3 min, *ee* >99%; *minor diastereomer* *t* = 10.1 min, *ee* >99%. Spectral data are in agreement with previously reported.<sup>5</sup>

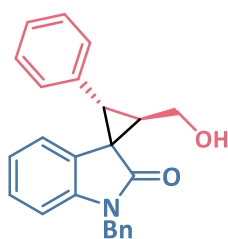

**red-3n**

**(2R,3S)-1'-Benzyl-2'-oxo-3-phenylspiro[cyclopropane-1,3'-indoline]-2-carbaldehyde (red-3n):** synthesized according to general procedure from (*E*)-cinnamaldehyde and 1-benzylindolin-2-one at 8.8 mA for 2 hours. The resulting mixture was diluted with MeOH (5 mL) and quenched with NaBH<sub>4</sub> (1.5 mmol, 5 equiv., 56.8 mg). After stirring for 5 min, H<sub>2</sub>O (5 mL) was added. The mixture was extracted with CH<sub>2</sub>Cl<sub>2</sub> (4 x 15 mL), combined organic fractions were washed with brine (15 mL), dried over MgSO<sub>4</sub> and concentrated under reduced pressure. The residue was purified by column chromatography on silica gel (eluent: 0 → 30% Et<sub>2</sub>O in PE/CH<sub>2</sub>Cl<sub>2</sub> = 1:1) to give **red-3n** (59 mg, 0.17 mmol) as a yellowish oil in 56% yield as an inseparable mixture of diastereomers (4.8:1). <sup>1</sup>H NMR *major diastereomer* (400 MHz, CDCl<sub>3</sub>) δ 7.38 – 7.13 (m, 12H), 7.08 – 7.01 (m, 1H), 6.85 – 6.79 (m, 1H), 4.91 (d, *J* = 15.7 Hz, 1H), 4.83 (d, *J* = 15.6 Hz, 1H), 4.31 – 4.21 (m, 1H), 4.14 – 4.04 (m, 1H), 3.26 (d, *J* = 8.4 Hz, 1H), 3.05 (td, *J* = 8.4, 6.1 Hz, 1H). <sup>1</sup>H NMR *minor diastereomer characteristic signals* (400 MHz, CDCl<sub>3</sub>) δ 6.67 (td, *J* = 7.6, 1.0 Hz, 1H), 5.99 – 5.94 (m, 1H), 5.13 – 4.97 (m, 2H), 3.83 (d, *J* = 8.2 Hz, 1H), 2.73 – 2.66 (m, 1H). <sup>13</sup>C NMR *major diastereomer* (101 MHz, CDCl<sub>3</sub>) δ 173.3, 143.2, 136.3, 134.2, 129.4, 128.8, 128.1, 127.8, 127.6, 127.5, 127.5, 127.1, 122.1, 120.5, 109.3, 60.7, 44.1, 42.2, 38.5, 37.6. <sup>13</sup>C NMR *minor diastereomer* (101 MHz, CDCl<sub>3</sub>) δ 176.8, 142.2, 136.1, 134.7, 130.0, 129.0, 128.5, 127.8, 127.7, 127.3, 126.7, 122.0, 120.8, 109.0, 59.2, 44.3, 39.6, 39.6, 37.5. HPLC *major diastereomer* (Chiralpak OJ-H, *i*-PrOH/hexane = 20/80, flow rate = 1 mL/min, λ = 210 nm): *t*<sub>major</sub> = 15.5 min, *t*<sub>minor</sub> = 29.4 min, *ee* >99%. HRMS (ESI) *m/z* [M+Na]<sup>+</sup> calcd for C<sub>24</sub>H<sub>21</sub>NO<sub>2</sub>Na<sup>+</sup> 378.1465, found 378.1462.

## 9. References

- 1 H. Xie, L. Zu, H. Li, J. Wang and W. Wang, *J. Am. Chem. Soc.*, 2007, **129**, 10886–10894.
- 2 P. Llanes, C. Rodríguez-Esrich, S. Sayalero and M. A. Pericàs, *Org. Lett.*, 2016, **18**, 6292–6295.
- 3 I. Ibrahim, G. Zhao, R. Rios, J. Vesely, H. Sundén, P. Dziedzic and A. Córdova, *Chemistry A European J*, 2008, **14**, 7867–7879.
- 4 X. Companyó, A. Alba, F. Cárdenas, A. Moyano and R. Rios, *Eur J Org Chem*, 2009, **2009**, 3075–3080.
- 5 Z. Li, H. Zhang, L. Zhao, Y. Ma, Q. Wu, H. Ren, Z. Lin, J. Zheng and X. Yu, *Chem. Commun.*, 2024, **60**, 3579–3582.

## 10. NMR spectra

$^1\text{H}$  NMR of **3a** (400 MHz,  $\text{CDCl}_3$ )

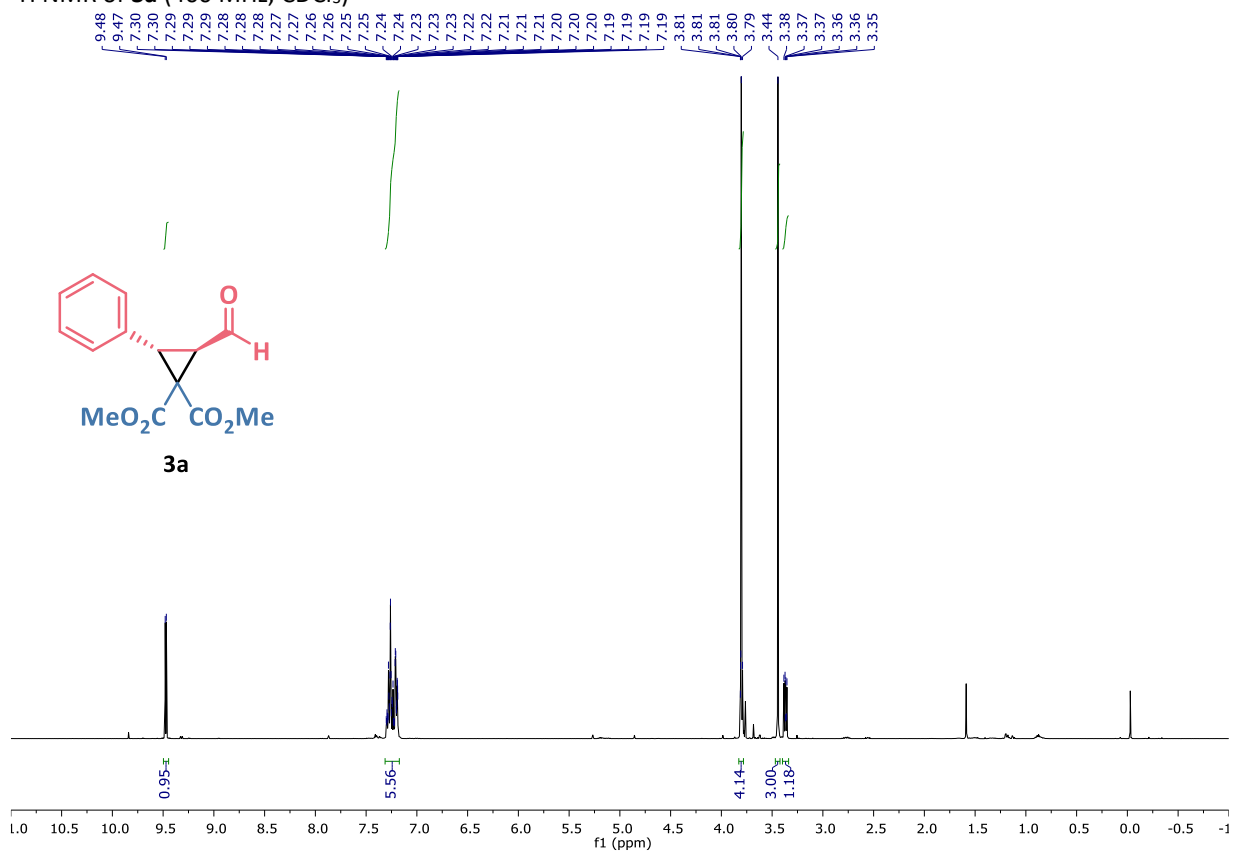

$^{13}\text{C}$  NMR of **3a** (101 MHz,  $\text{CDCl}_3$ )

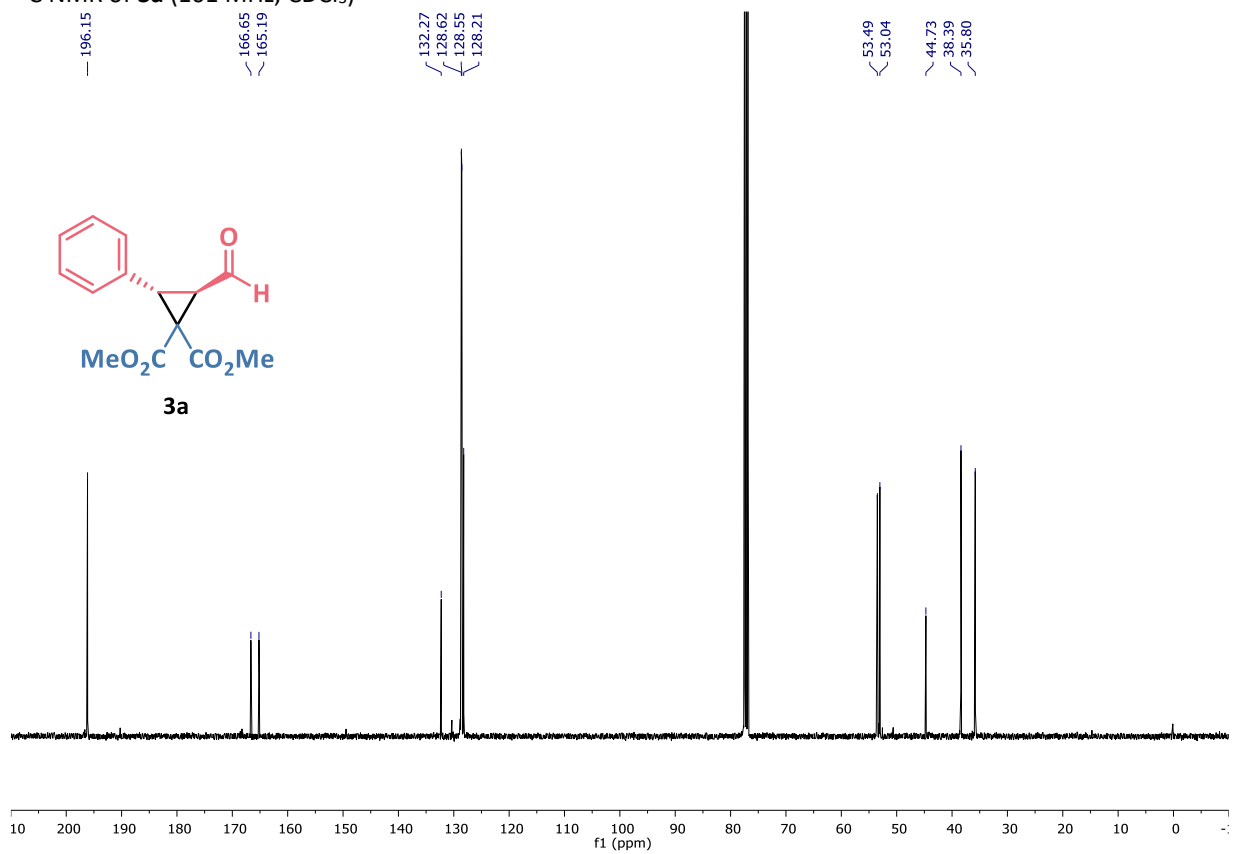

<sup>1</sup>H NMR of **3b** (400 MHz, CDCl<sub>3</sub>)

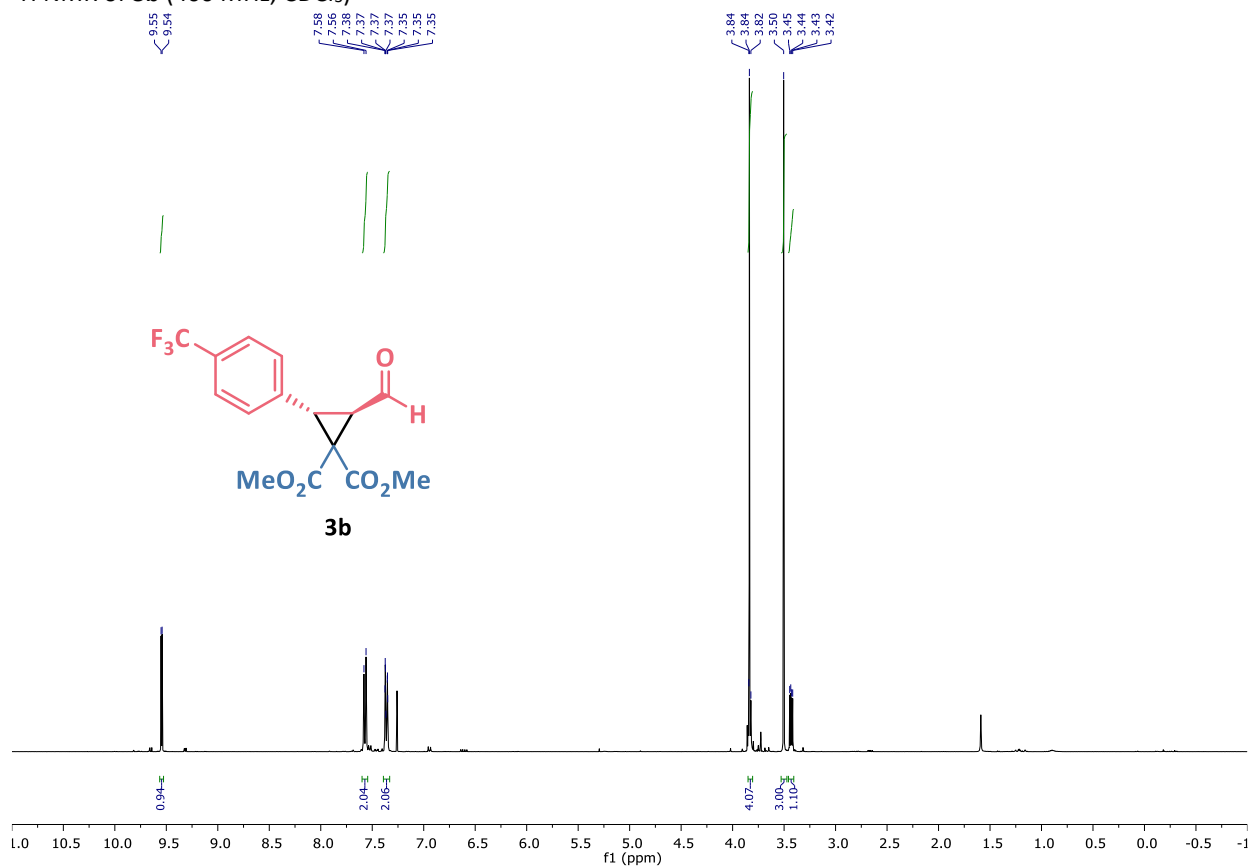

<sup>13</sup>C NMR of **3b** (101 MHz, CDCl<sub>3</sub>)

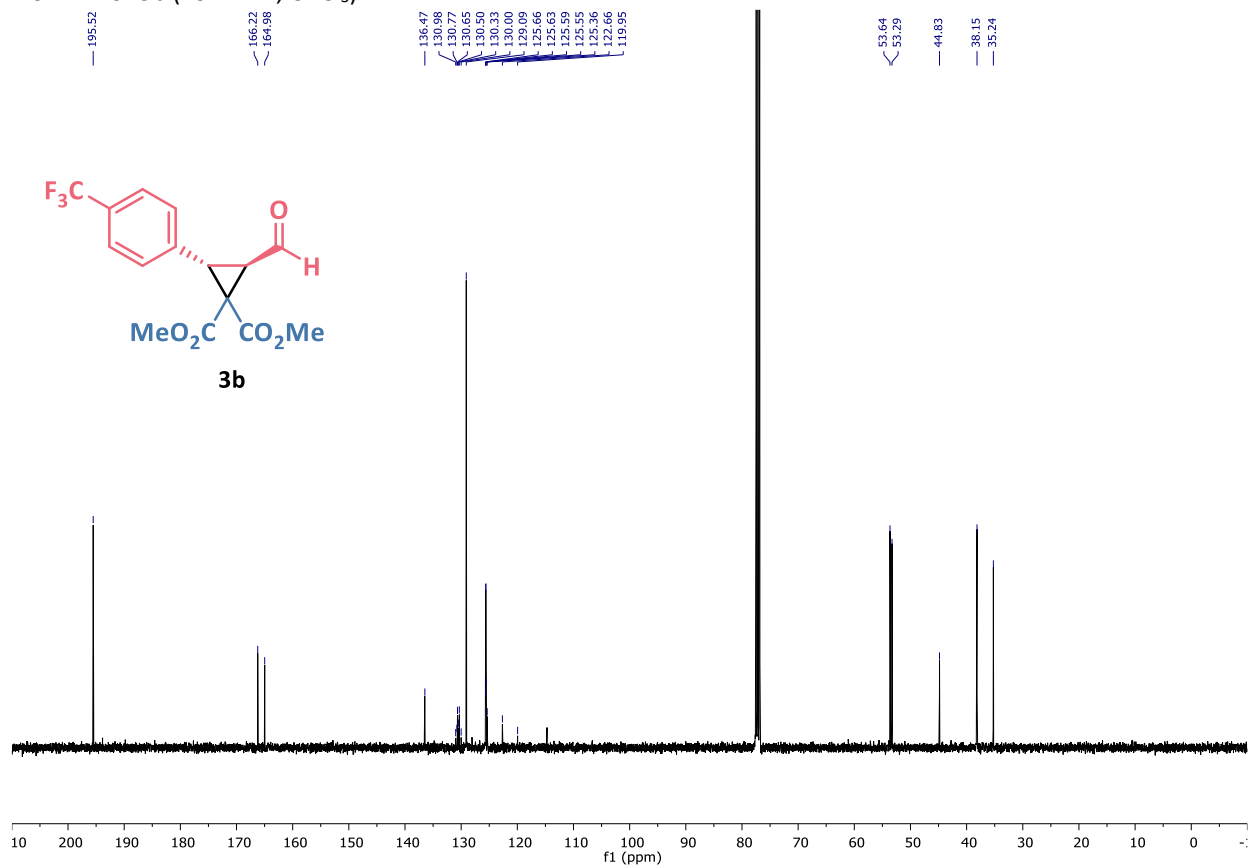

<sup>1</sup>H NMR of **3c** (400 MHz, CDCl<sub>3</sub>)

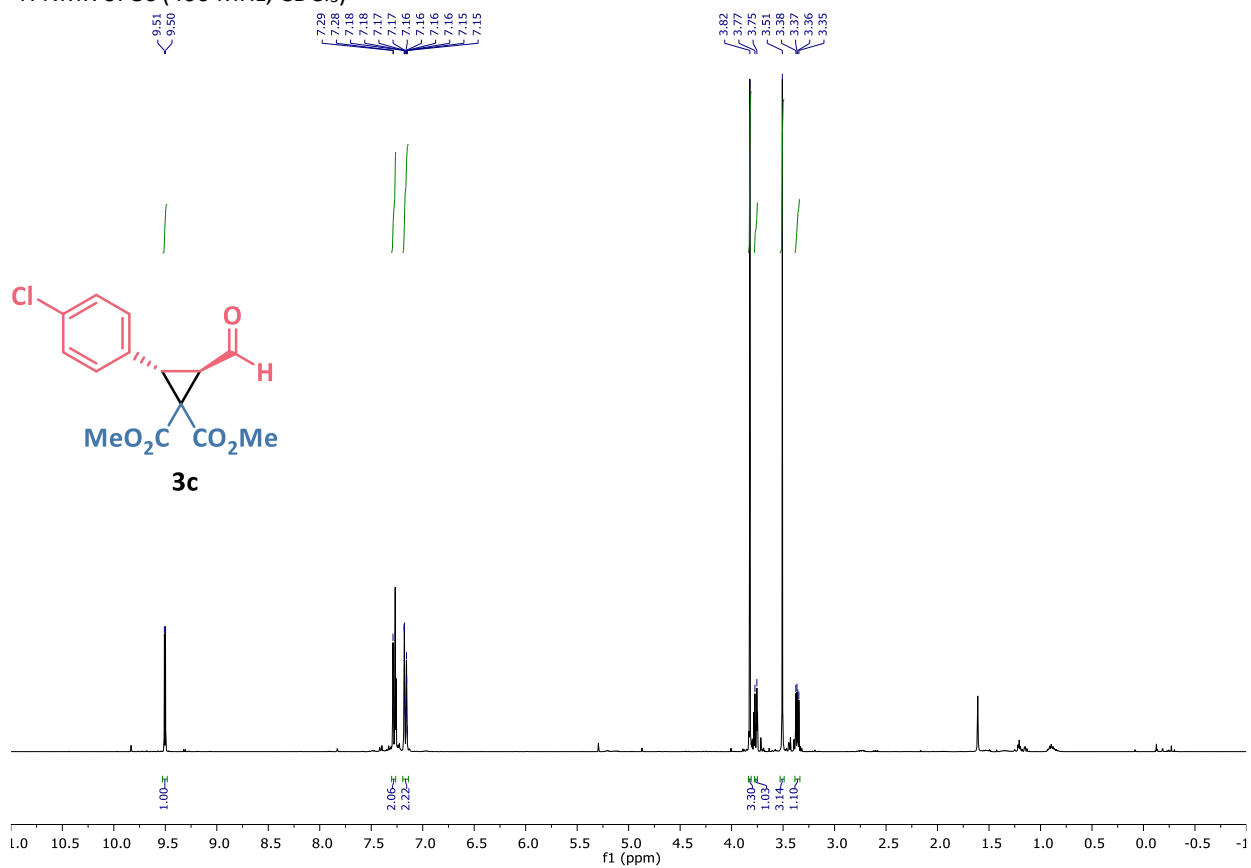

<sup>13</sup>C NMR of **3c** (101 MHz, CDCl<sub>3</sub>)

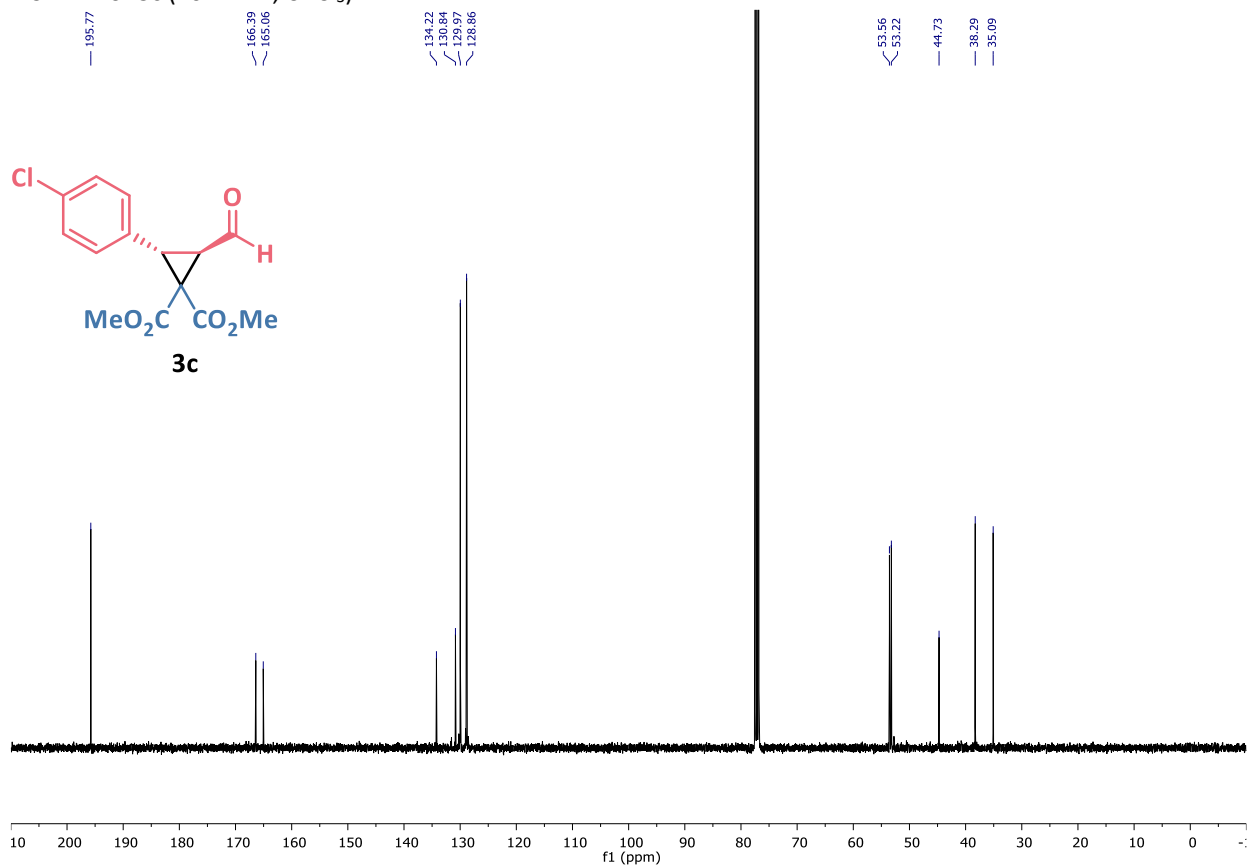

<sup>1</sup>H NMR of **3d** (400 MHz, CDCl<sub>3</sub>)

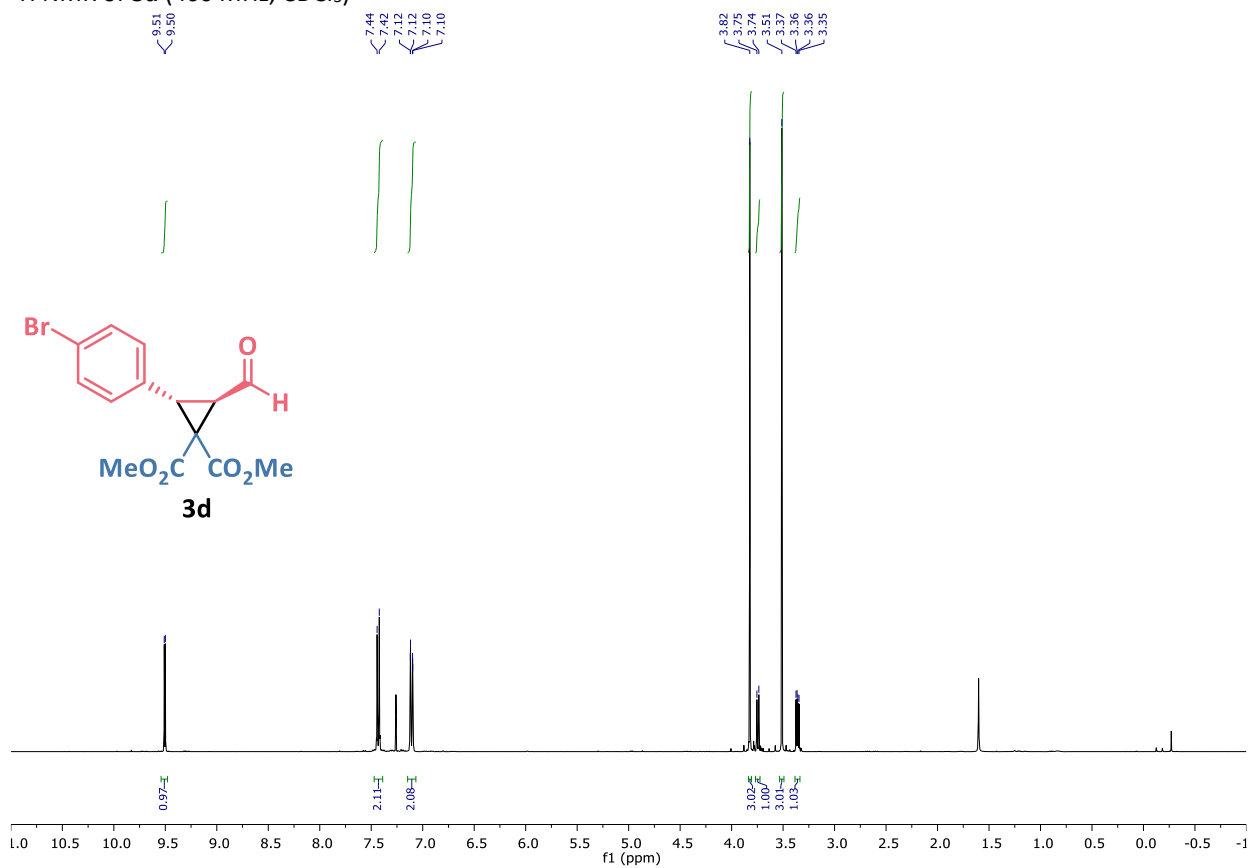

<sup>13</sup>C NMR of **3d** (101 MHz, CDCl<sub>3</sub>)

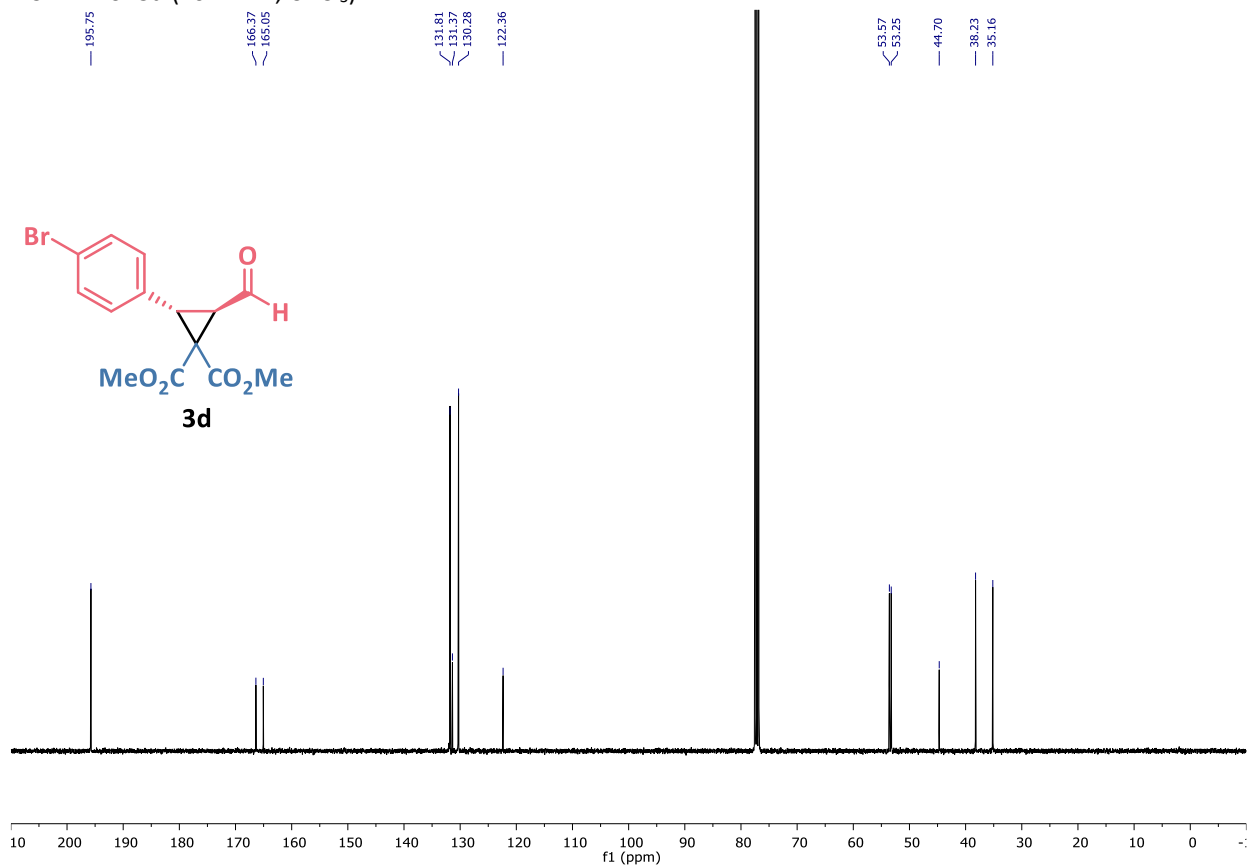

<sup>1</sup>H NMR of **3e** (400 MHz, CDCl<sub>3</sub>)

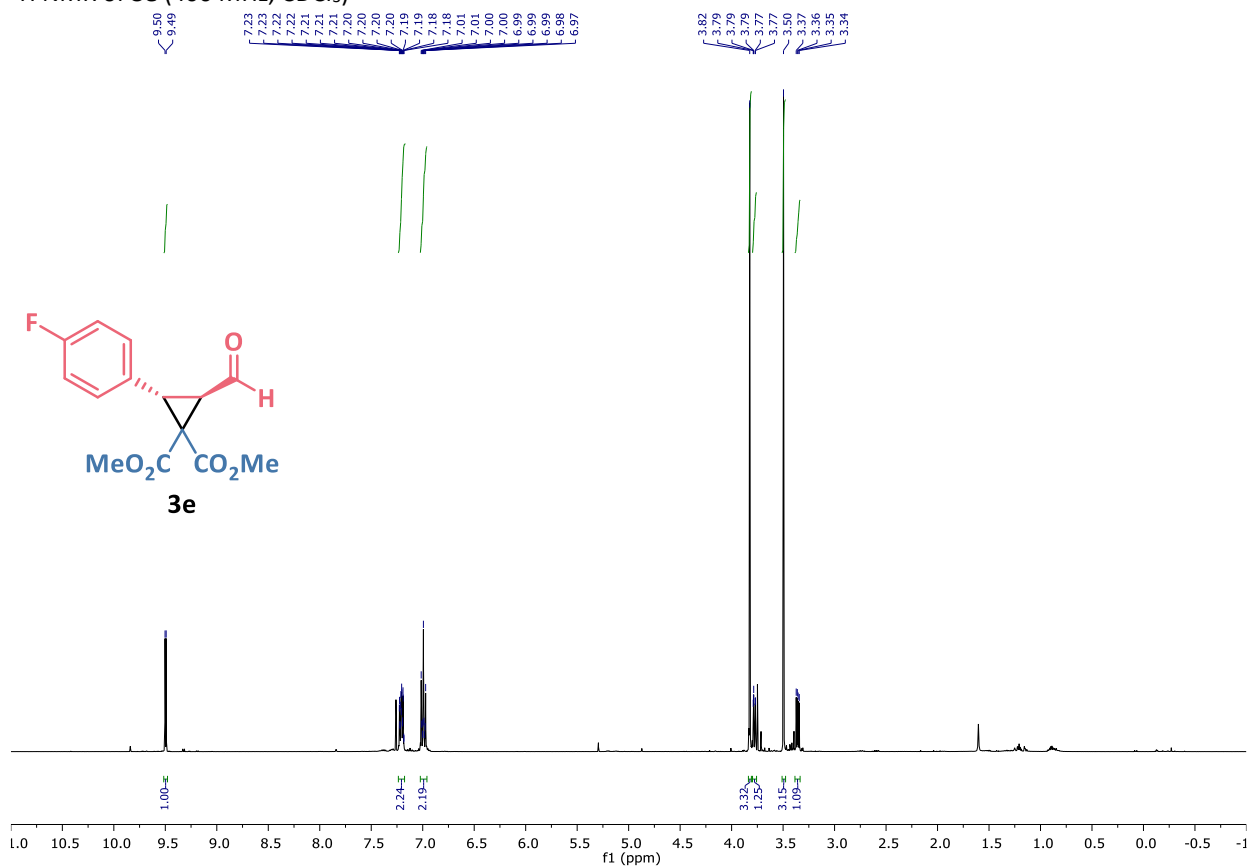

<sup>13</sup>C NMR of **3e** (101 MHz, CDCl<sub>3</sub>)

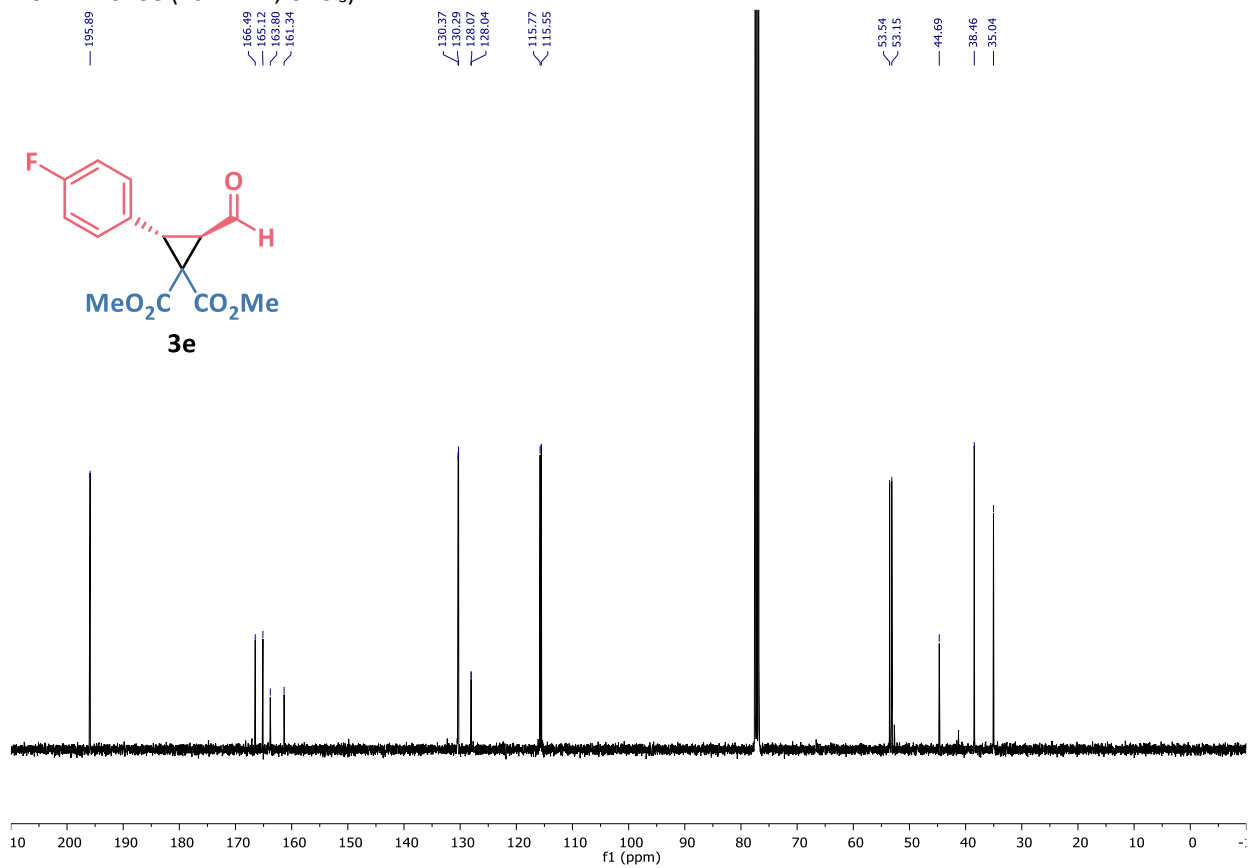



<sup>1</sup>H NMR of **3f** (400 MHz, CDCl<sub>3</sub>)

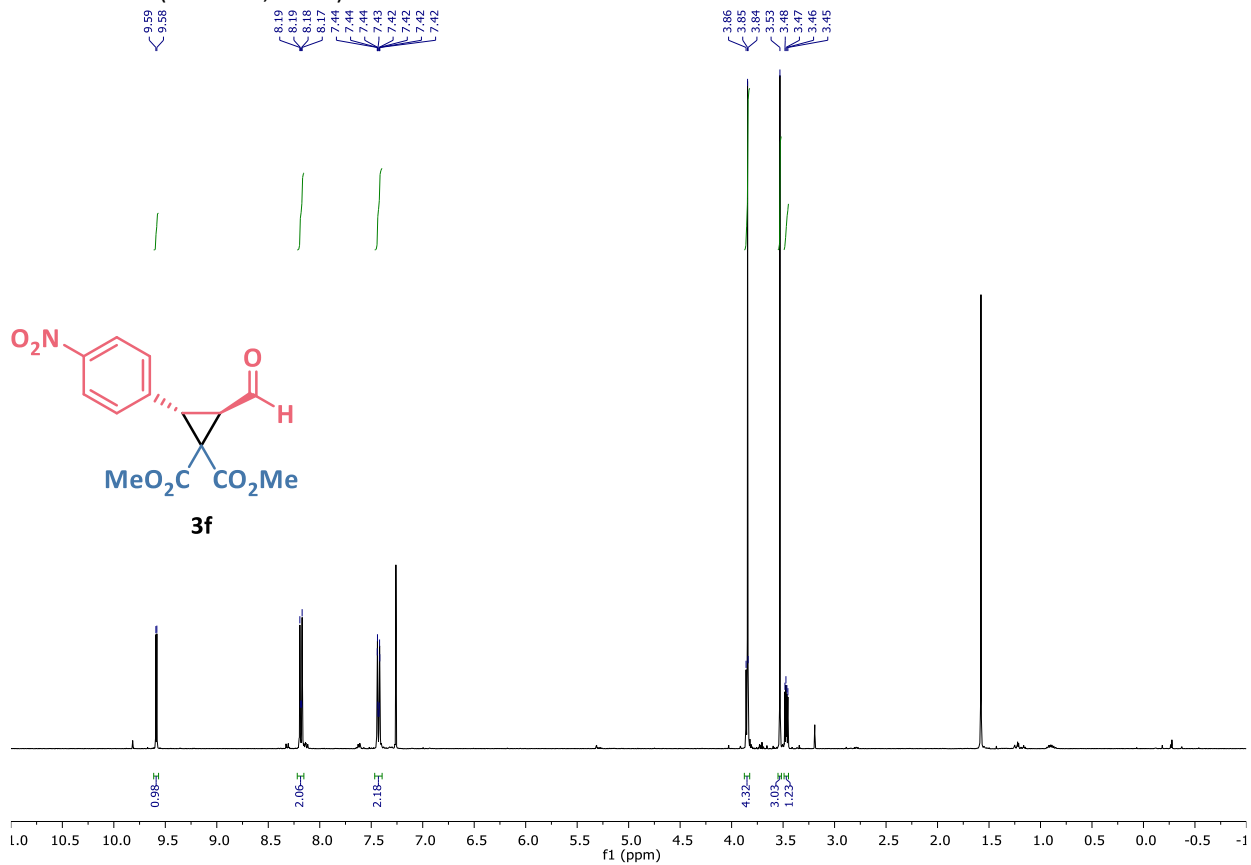

<sup>13</sup>C NMR of **3f** (101 MHz, CDCl<sub>3</sub>)

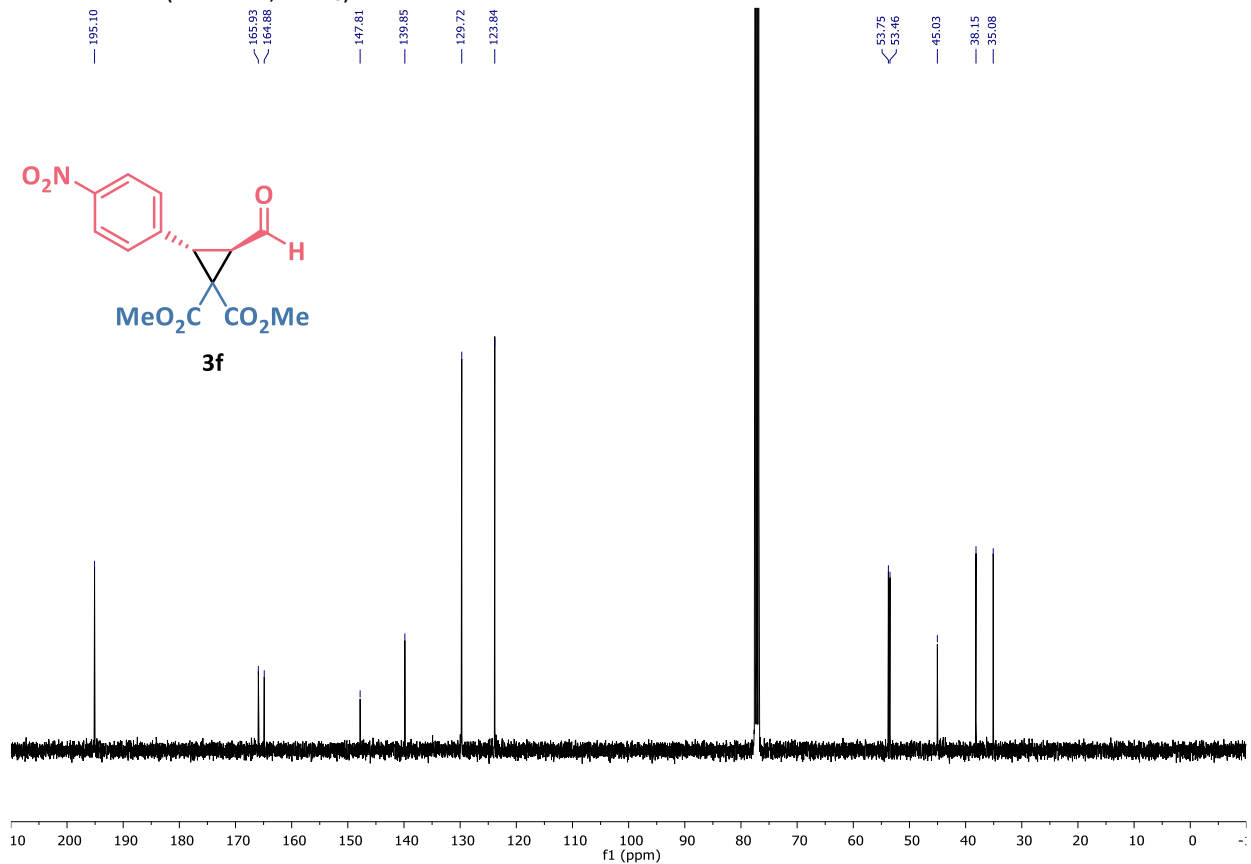

<sup>1</sup>H NMR of **3g** (400 MHz, CDCl<sub>3</sub>)

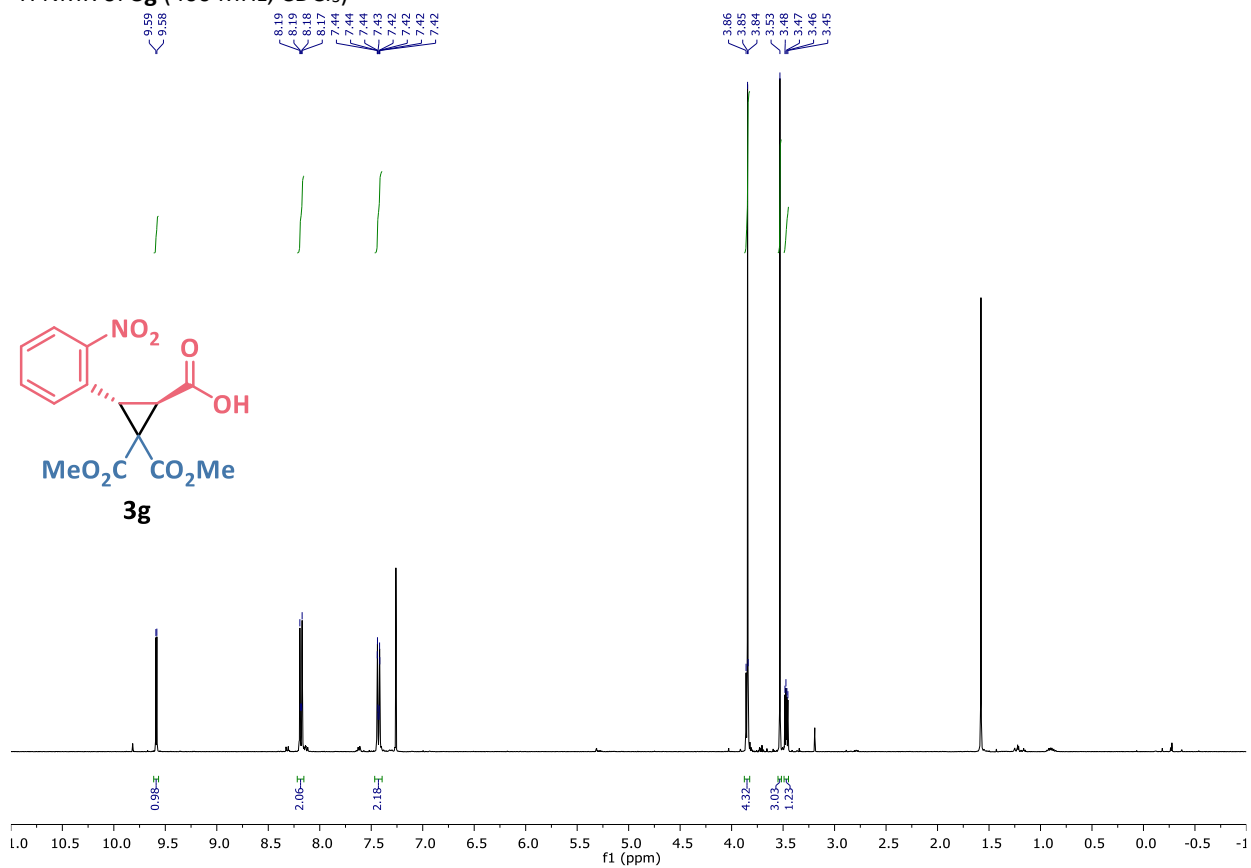

<sup>13</sup>C NMR of **3g** (101 MHz, CDCl<sub>3</sub>)

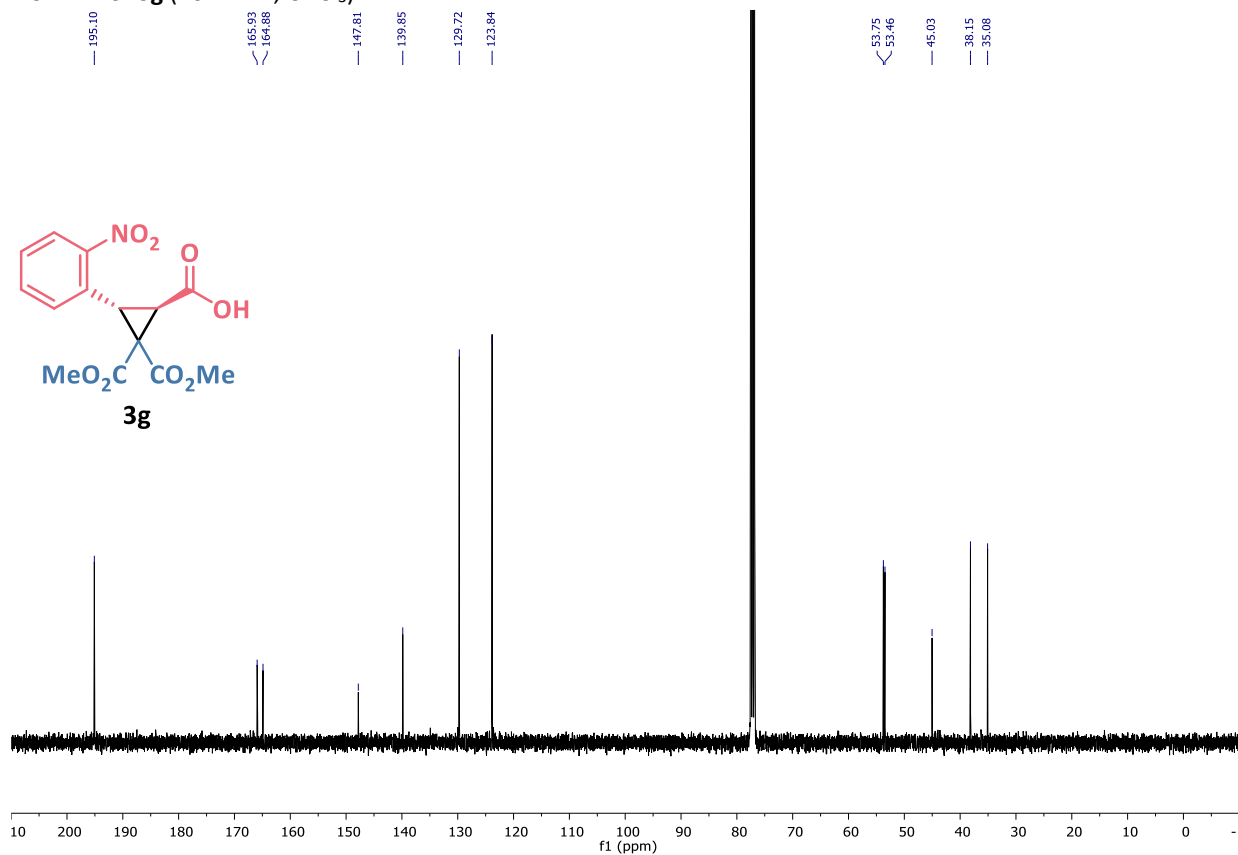

<sup>1</sup>H NMR of **3h** (400 MHz, CDCl<sub>3</sub>)

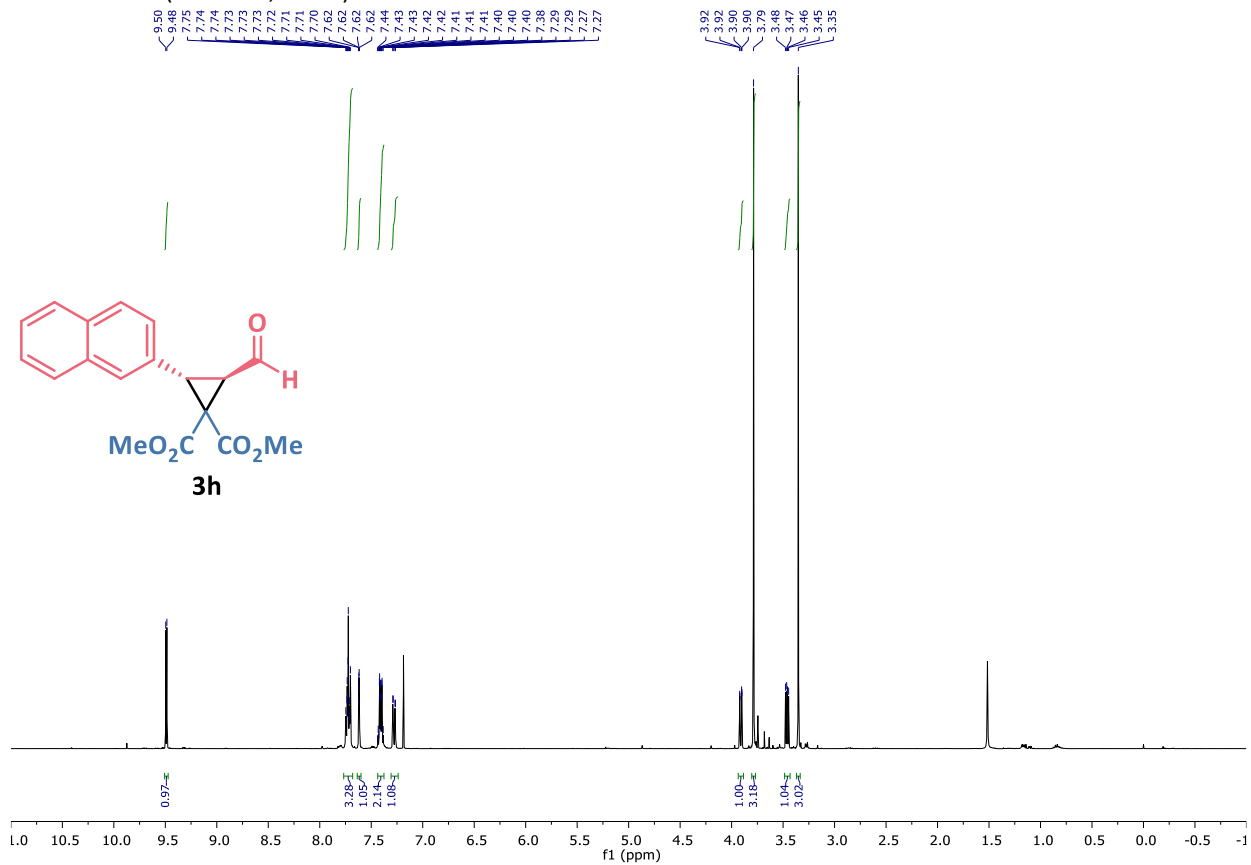

<sup>13</sup>C NMR of **3h** (101 MHz, CDCl<sub>3</sub>)

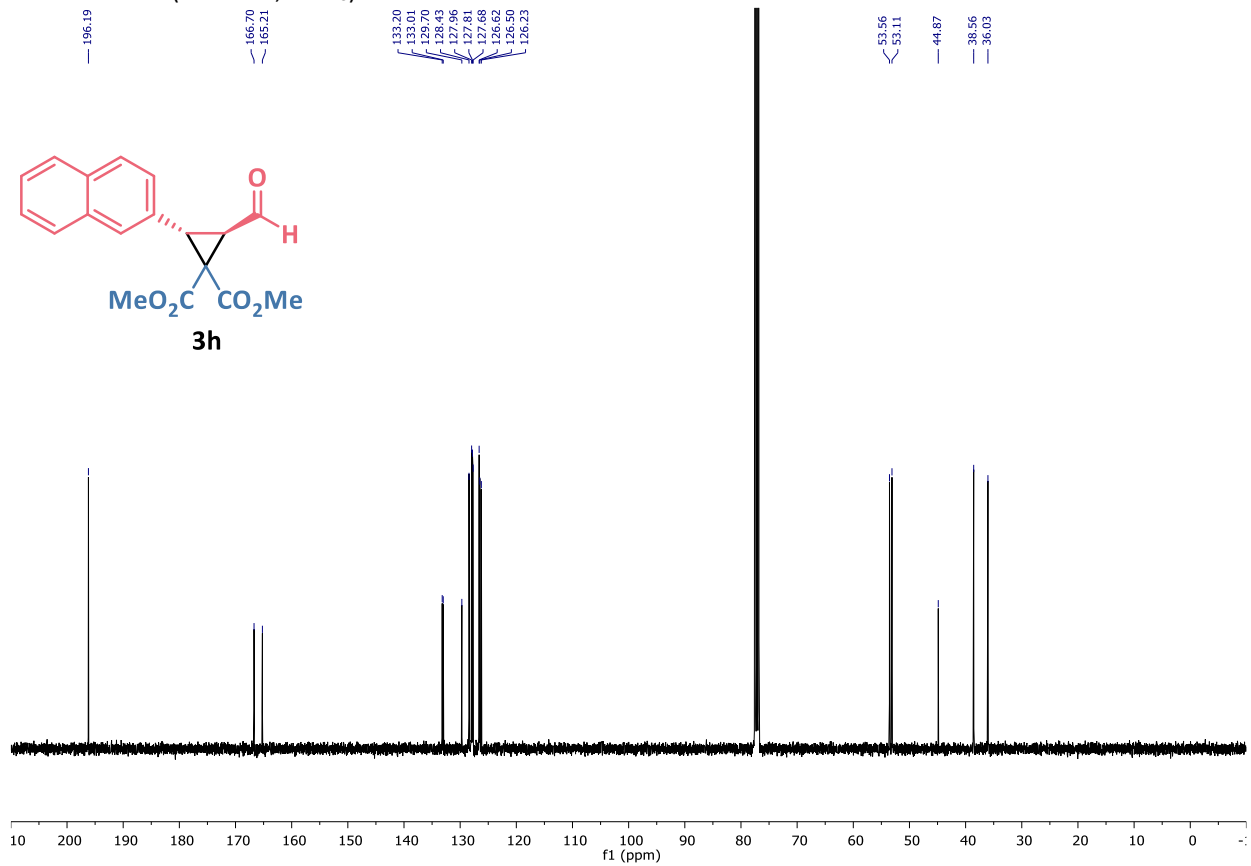

<sup>1</sup>H NMR of **3i** (400 MHz, CDCl<sub>3</sub>)

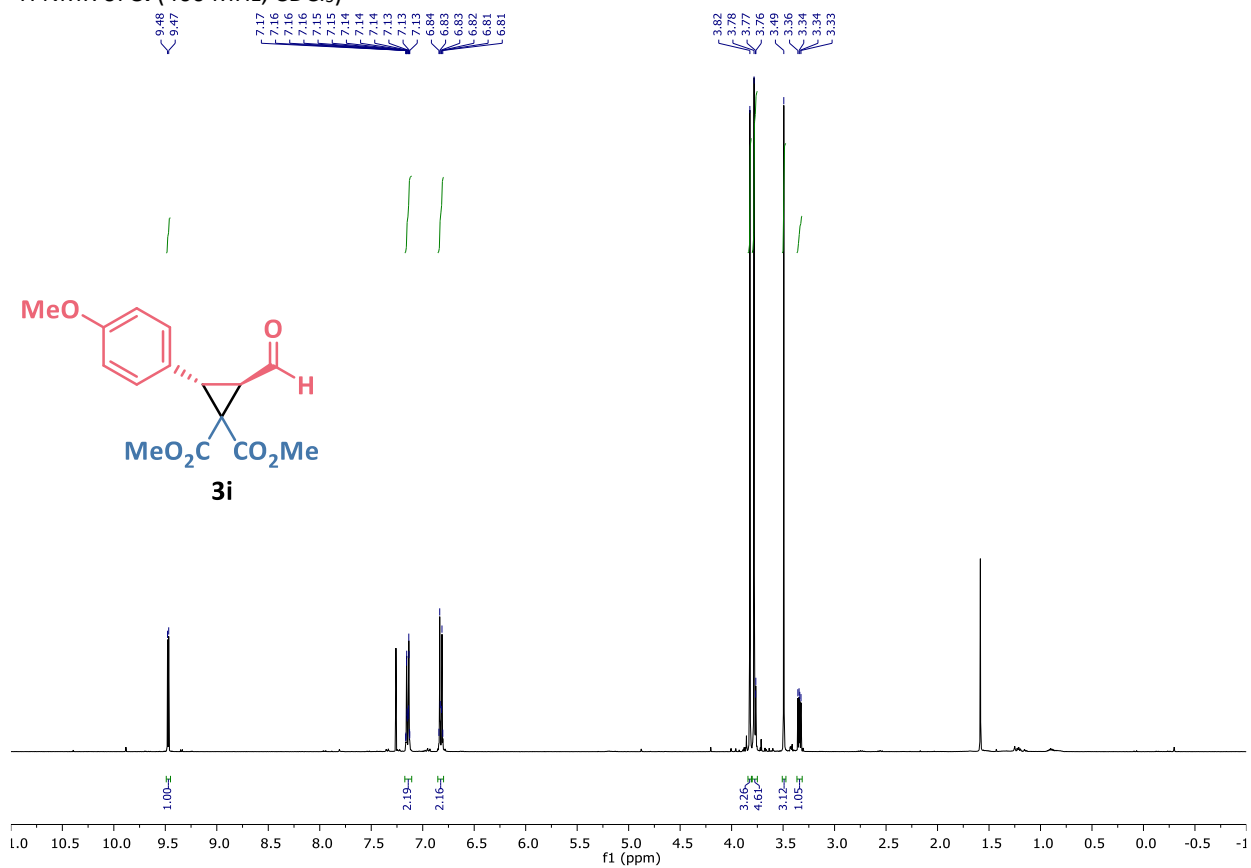

<sup>13</sup>C NMR of **3i** (101 MHz, CDCl<sub>3</sub>)

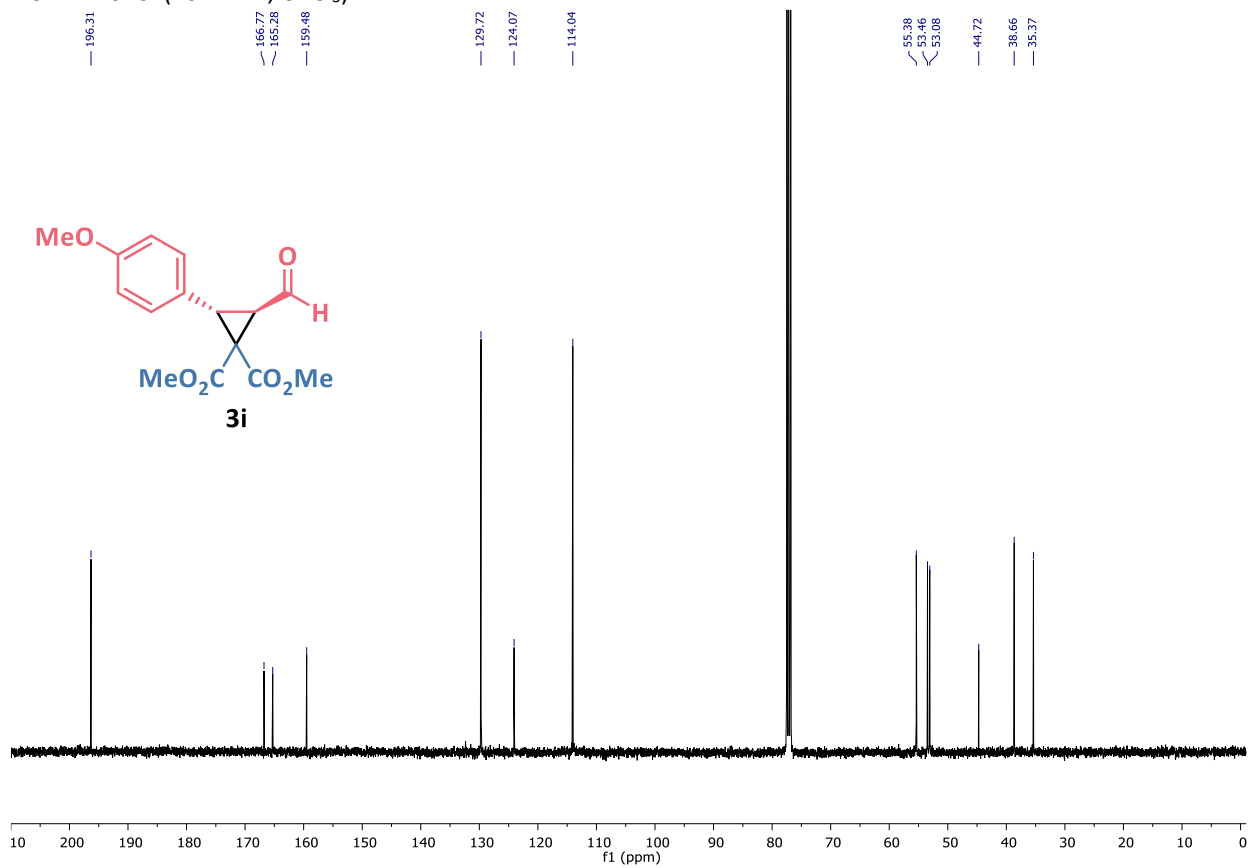

<sup>1</sup>H NMR of **3j** (400 MHz, CDCl<sub>3</sub>)

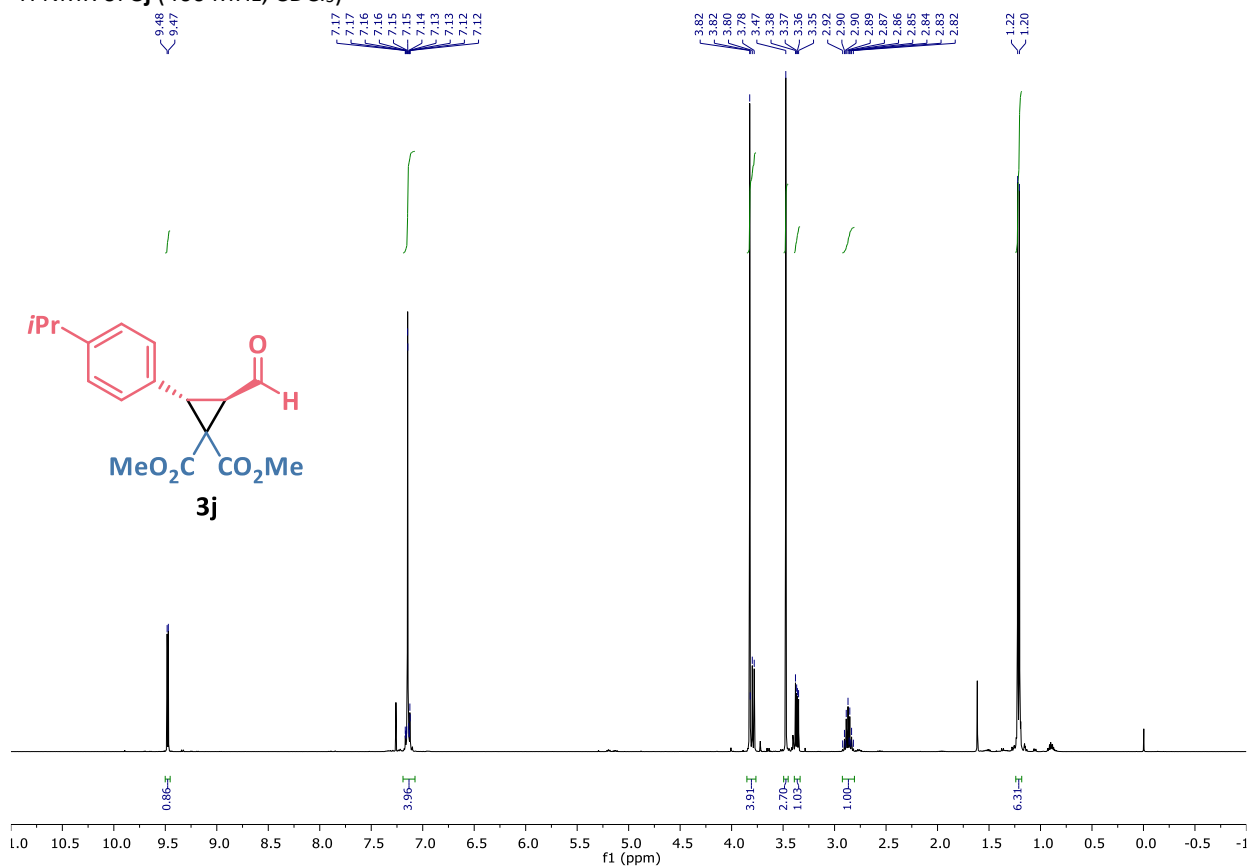

<sup>13</sup>C NMR of **3j** (101 MHz, CDCl<sub>3</sub>)

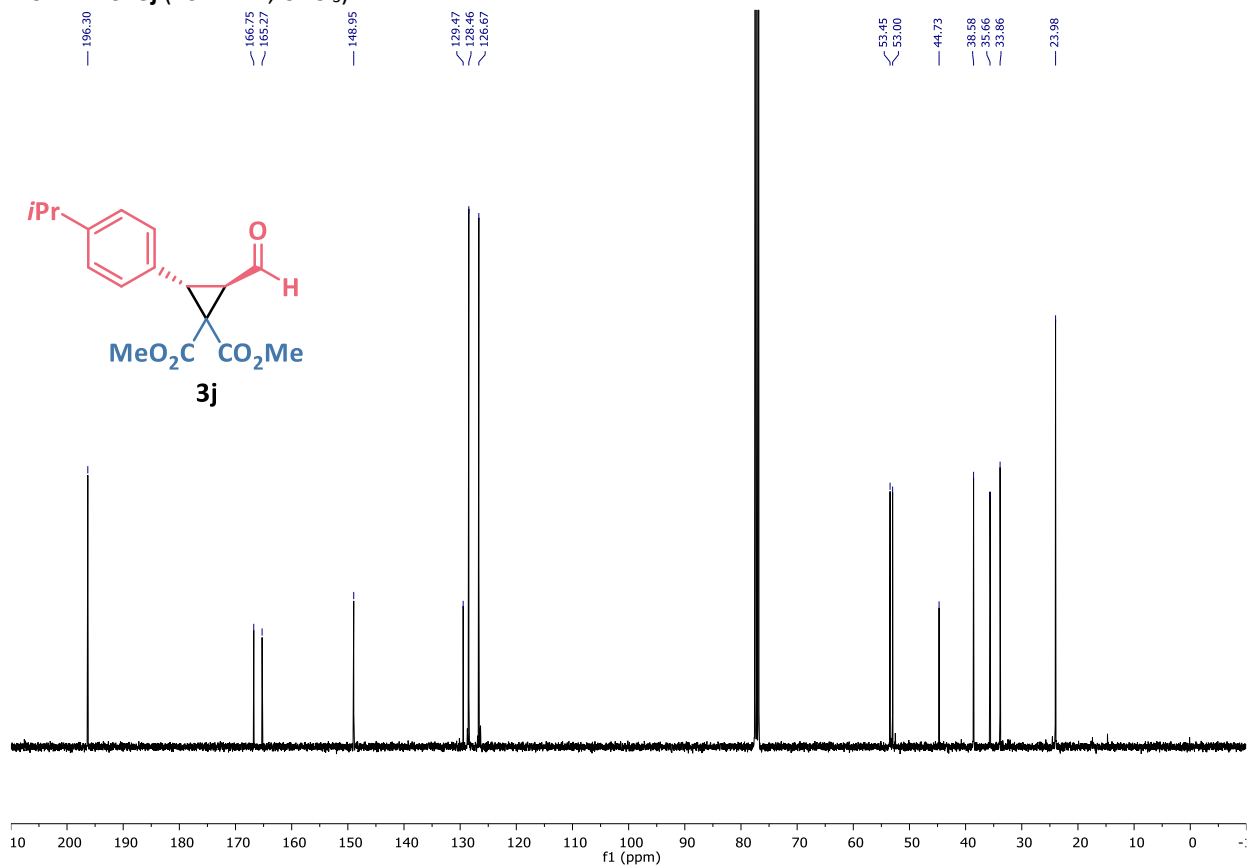

<sup>1</sup>H NMR of **3k** (400 MHz, CDCl<sub>3</sub>)

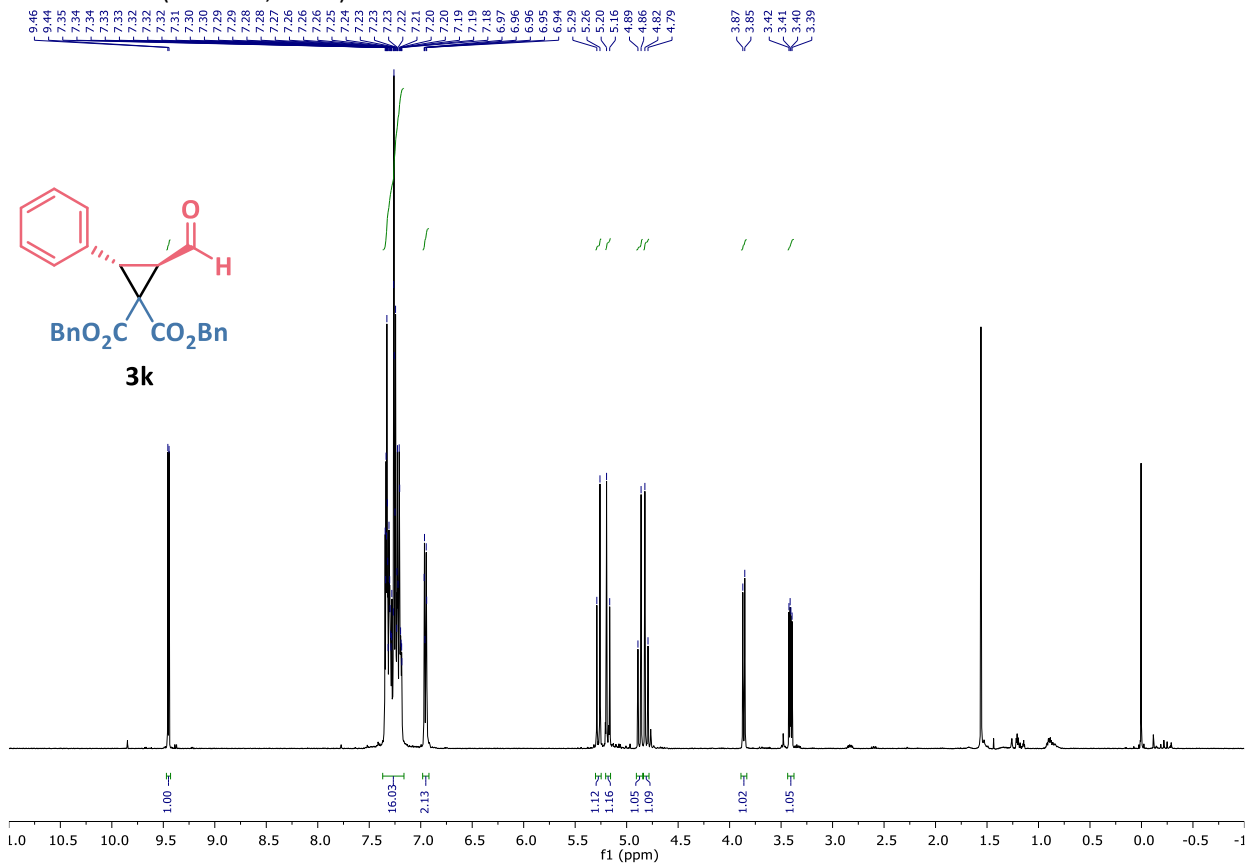

<sup>13</sup>C NMR of **3k** (101 MHz, CDCl<sub>3</sub>)

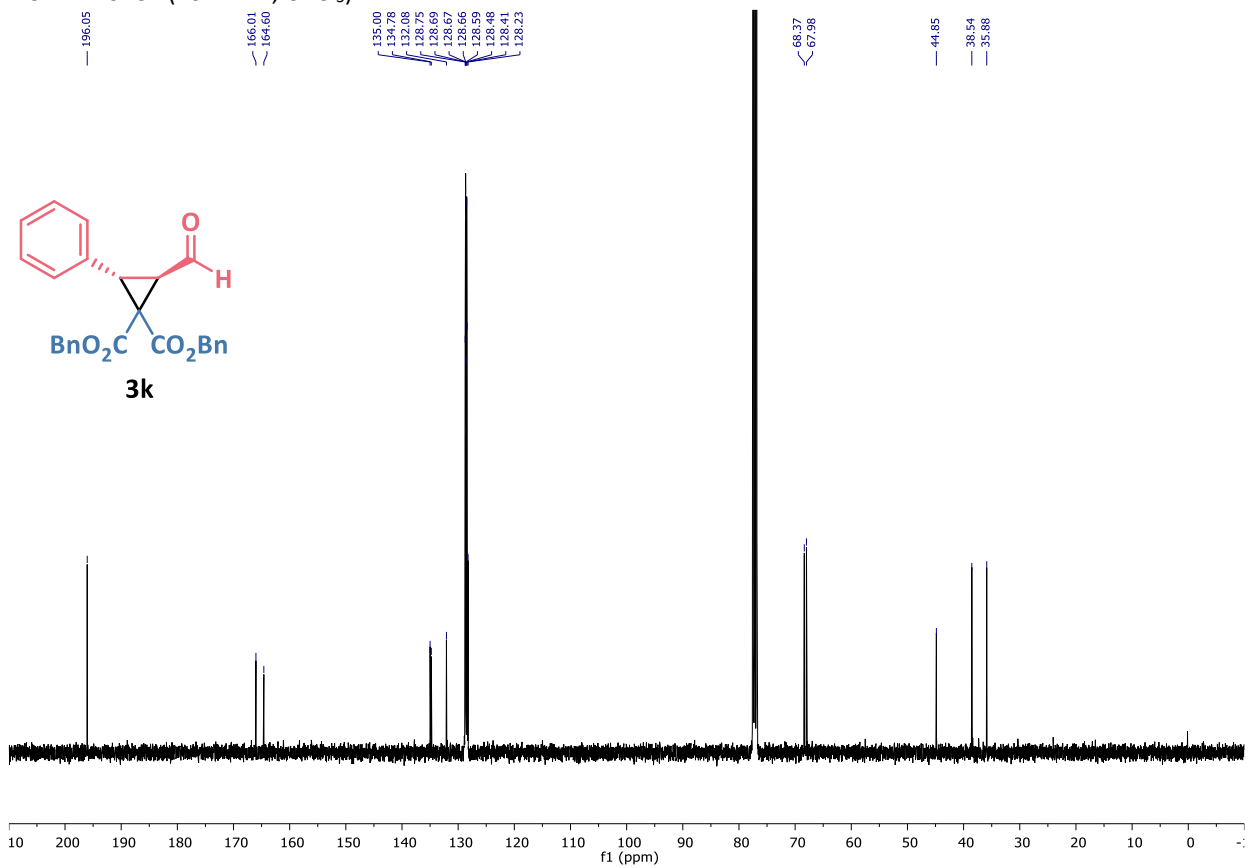

<sup>1</sup>H NMR of **3I** (400 MHz, CDCl<sub>3</sub>)

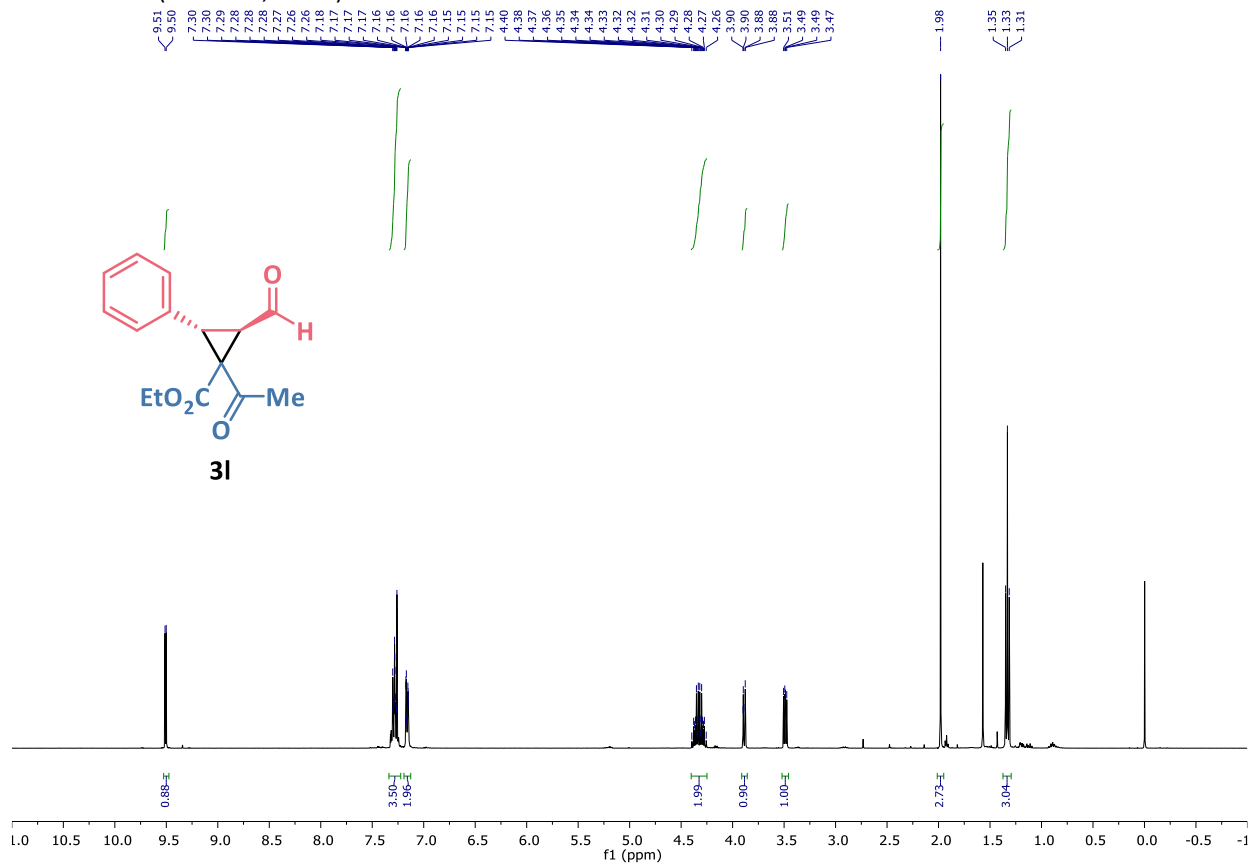

<sup>13</sup>C NMR of **3I** (101 MHz, CDCl<sub>3</sub>)

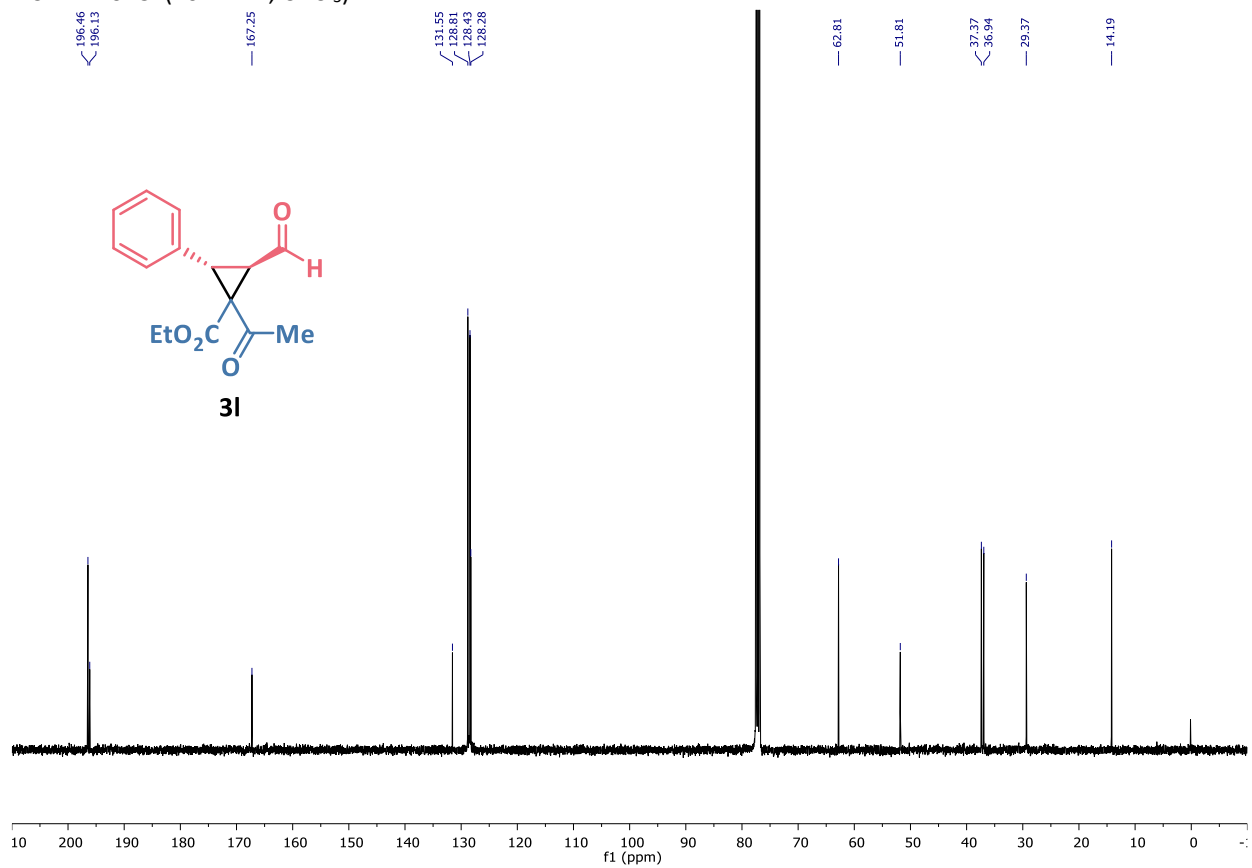

<sup>1</sup>H NMR of red-3m (400 MHz, CD<sub>3</sub>OD)

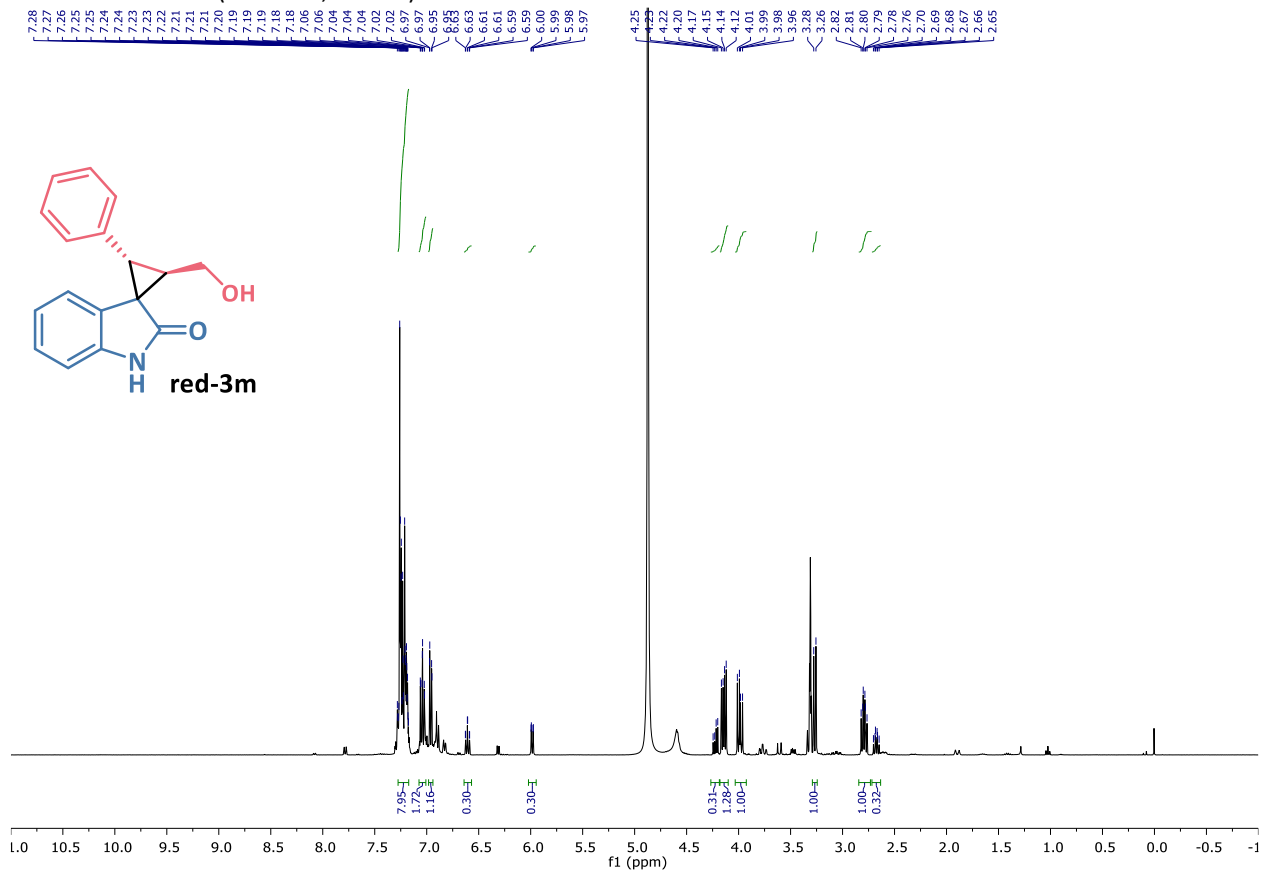

<sup>13</sup>C NMR of red-3m (101 MHz, CD<sub>3</sub>OD)

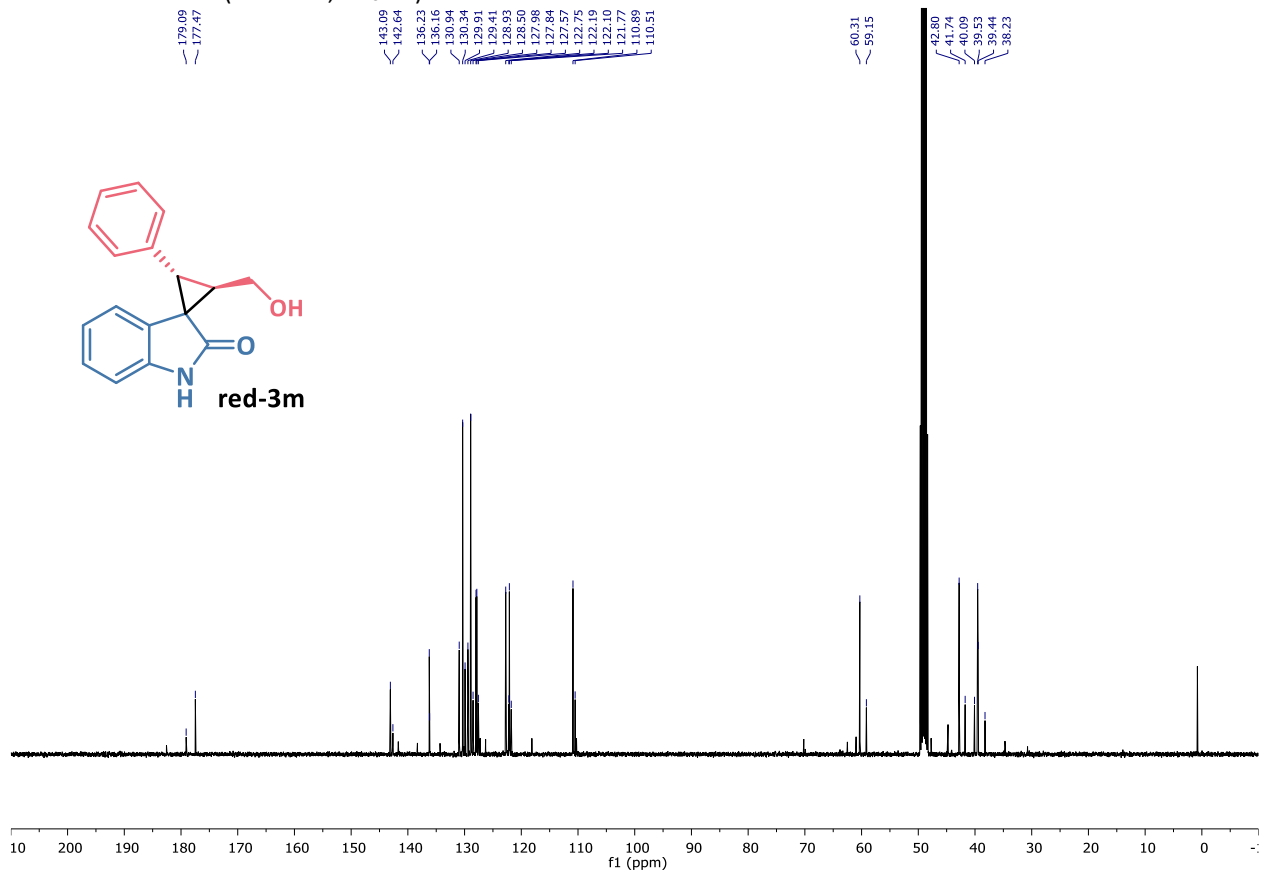



<sup>1</sup>H NMR of red-3n (400 MHz, CDCl<sub>3</sub>)

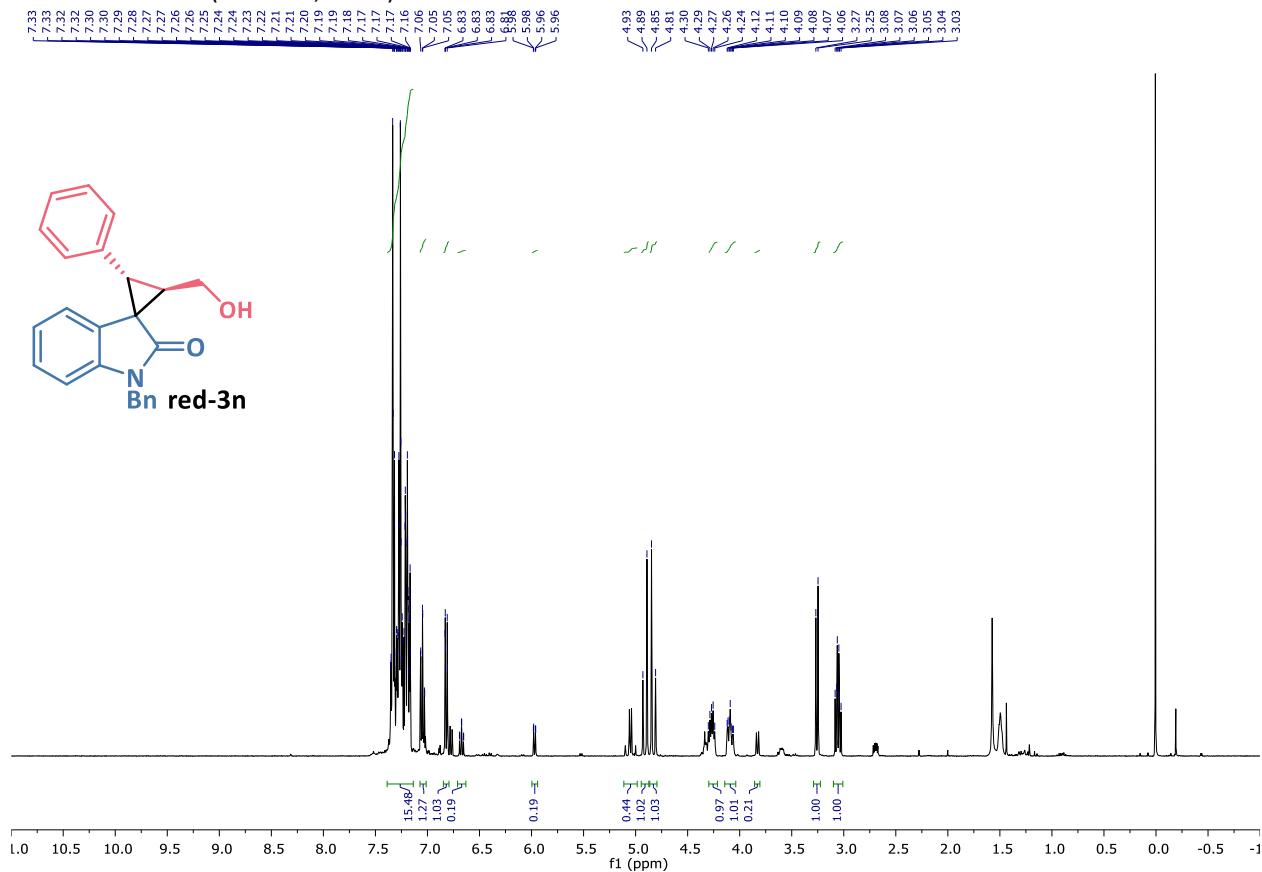

<sup>13</sup>C NMR of red-3n (101 MHz, CDCl<sub>3</sub>)

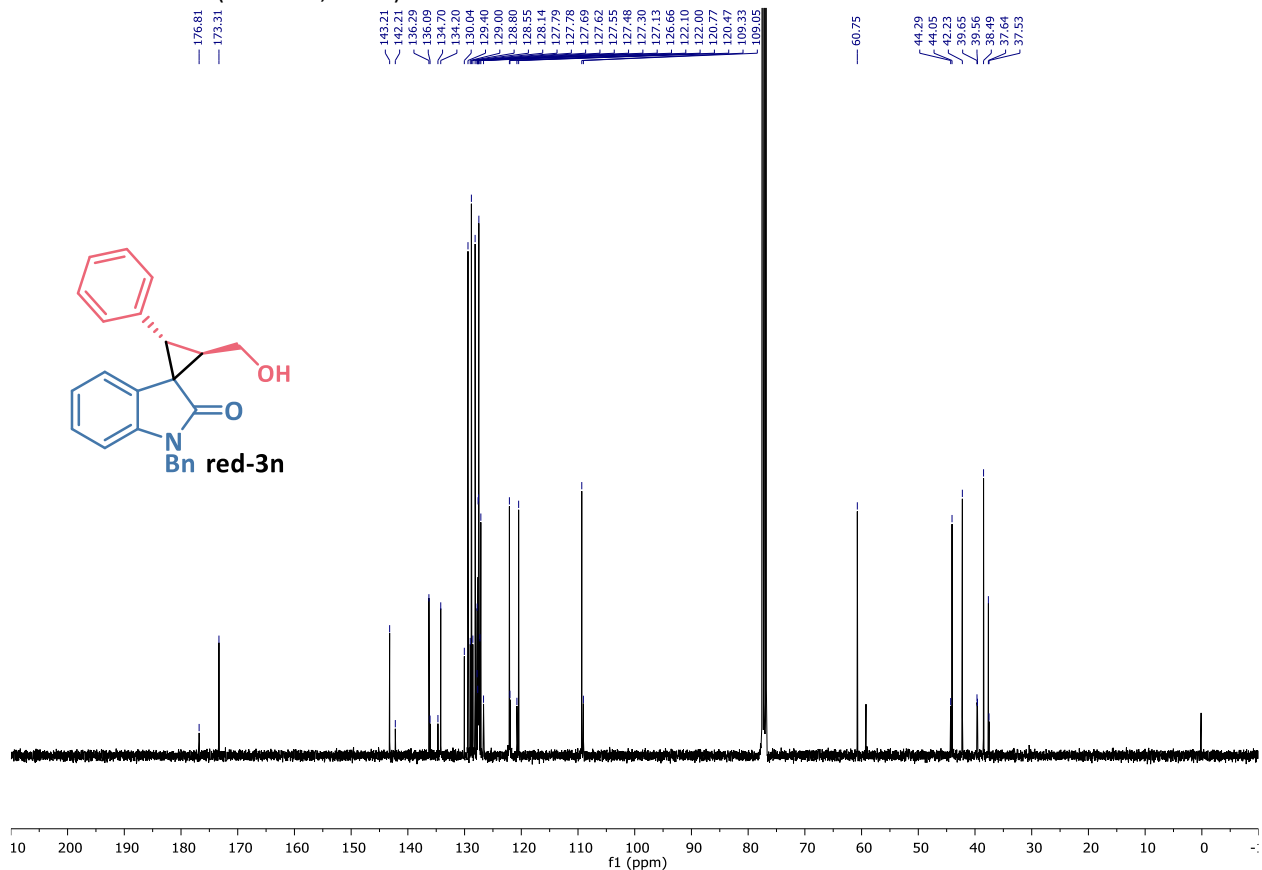

## 11. HPLC chromatograms

HPLC trace of *rac*-3a.

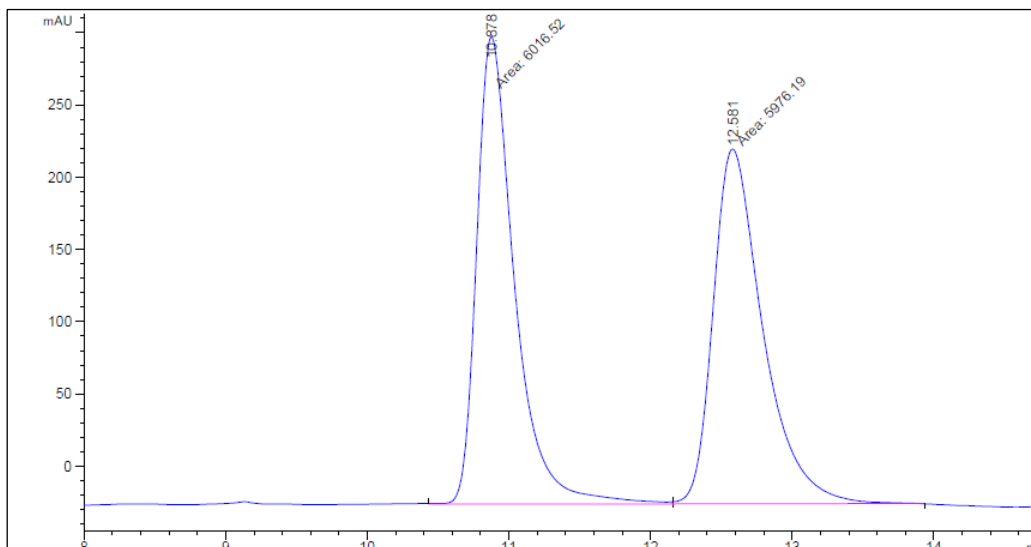

Signal 1: MWD1 C, Sig=210,8 Ref=360,100

| Peak # | RetTime [min] | Type | Width [min] | Area [mAU*s] | Height [mAU] | Area %  |
|--------|---------------|------|-------------|--------------|--------------|---------|
| 1      | 10.878        | MF   | 0.3100      | 6016.52441   | 323.45093    | 50.1682 |
| 2      | 12.581        | FM   | 0.4057      | 5976.18506   | 245.53014    | 49.8318 |

HPLC trace of 3a.

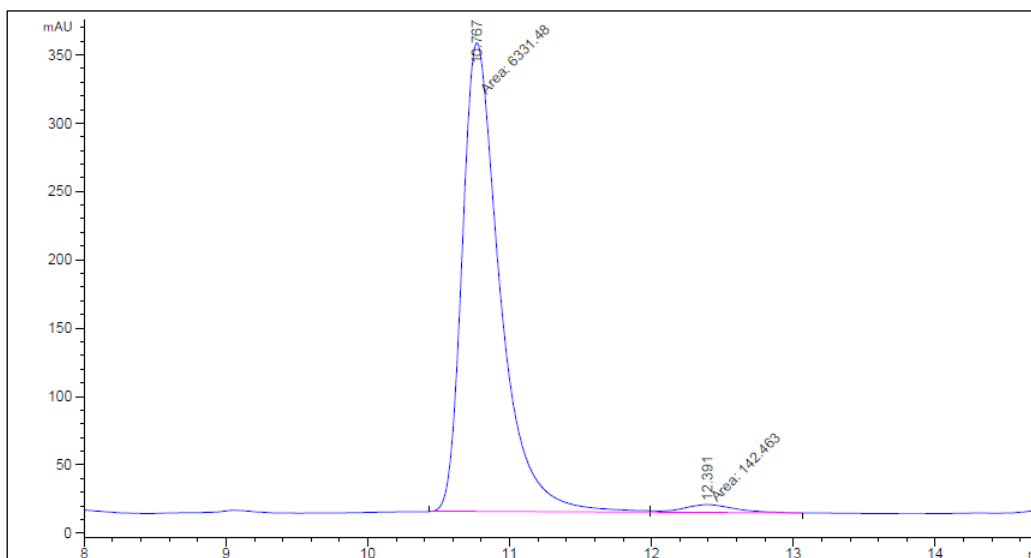

Signal 1: MWD1 C, Sig=210,8 Ref=360,100

| Peak # | RetTime [min] | Type | Width [min] | Area [mAU*s] | Height [mAU] | Area %  |
|--------|---------------|------|-------------|--------------|--------------|---------|
| 1      | 10.767        | MF   | 0.3080      | 6331.47705   | 342.65207    | 97.7994 |
| 2      | 12.391        | FM   | 0.4209      | 142.46320    | 5.64066      | 2.2006  |

HPLC trace of rac-3b.

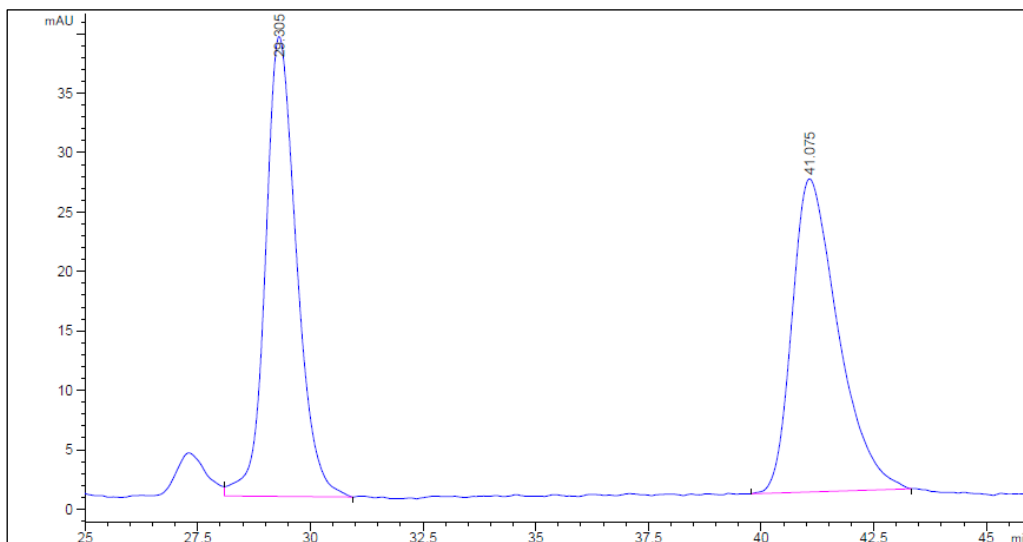

Signal 1: MWD1 C, Sig=210,8 Ref=360,100

| Peak # | RetTime [min] | Type | Width [min] | Area [mAU*s] | Height [mAU] | Area %  |
|--------|---------------|------|-------------|--------------|--------------|---------|
| 1      | 29.305        | VB   | 0.7321      | 1863.86963   | 38.68213     | 49.8734 |
| 2      | 41.075        | BB   | 1.0060      | 1873.33191   | 26.33040     | 50.1266 |

HPLC trace of 3b.

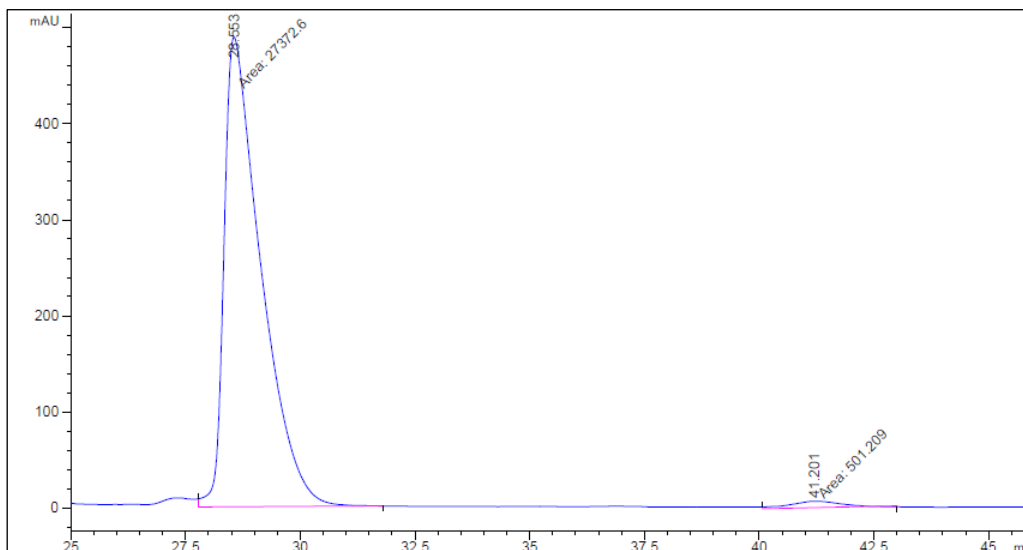

Signal 1: MWD1 C, Sig=210,8 Ref=360,100

| Peak # | RetTime [min] | Type | Width [min] | Area [mAU*s] | Height [mAU] | Area %  |
|--------|---------------|------|-------------|--------------|--------------|---------|
| 1      | 28.553        | FM   | 0.9324      | 2.73726e4    | 489.29459    | 98.2019 |
| 2      | 41.201        | MM   | 1.2817      | 501.20917    | 6.51752      | 1.7981  |

HPLC trace of rac-3c.

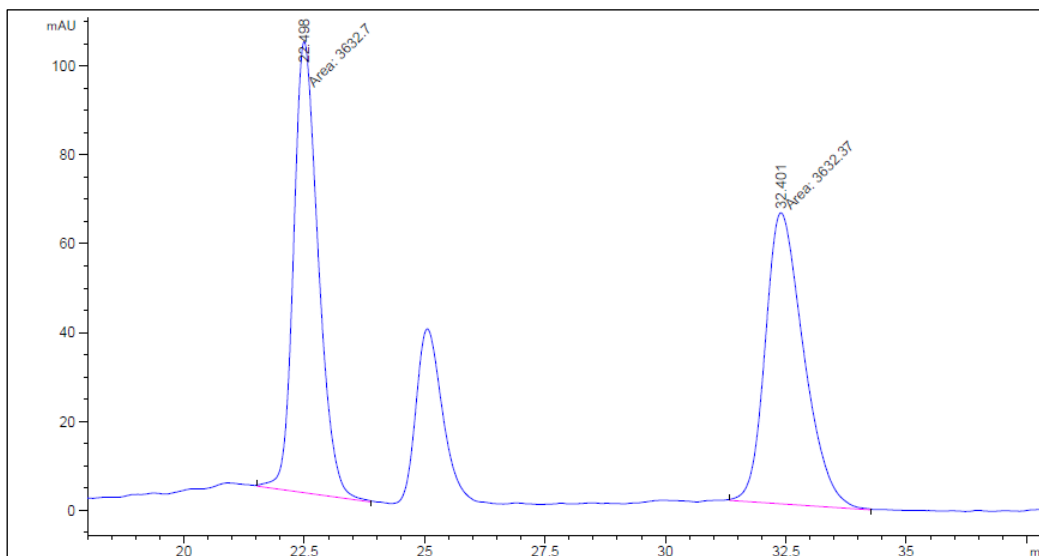

Signal 1: MWD1 C, Sig=210,8 Ref=360,100

| Peak # | RetTime [min] | Type | Width [min] | Area [mAU*s] | Height [mAU] | Area %  |
|--------|---------------|------|-------------|--------------|--------------|---------|
| 1      | 22.498        | MM   | 0.5961      | 3632.69629   | 101.57577    | 50.0023 |
| 2      | 32.401        | MM   | 0.9240      | 3632.36694   | 65.52168     | 49.9977 |

HPLC trace of 3c.

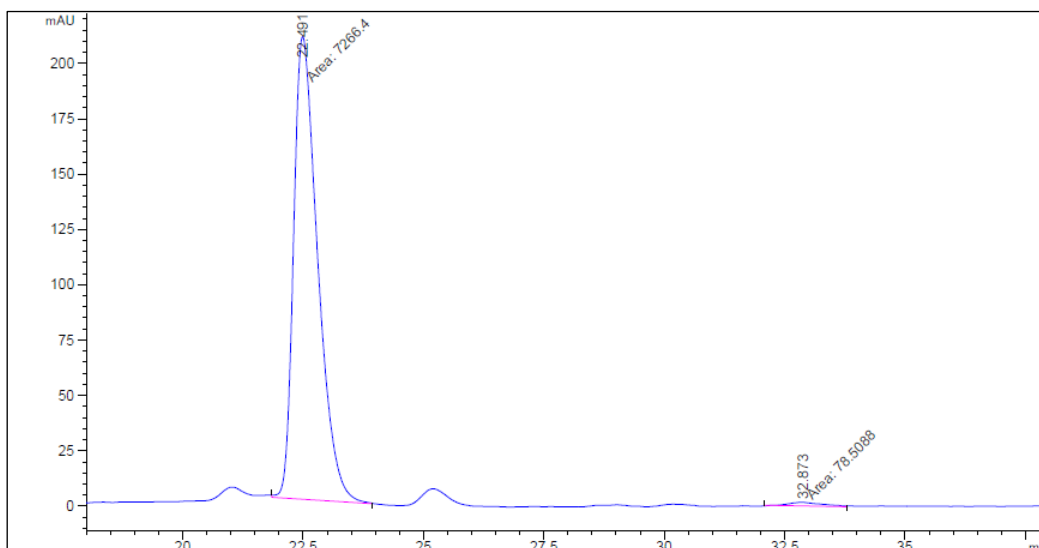

Signal 1: MWD1 C, Sig=210,8 Ref=360,100

| Peak # | RetTime [min] | Type | Width [min] | Area [mAU*s] | Height [mAU] | Area %  |
|--------|---------------|------|-------------|--------------|--------------|---------|
| 1      | 22.491        | MM   | 0.5794      | 7266.39893   | 209.00609    | 98.9311 |
| 2      | 32.873        | MM   | 0.8052      | 78.50882     | 1.62495      | 1.0689  |

HPLC trace of rac-3d.

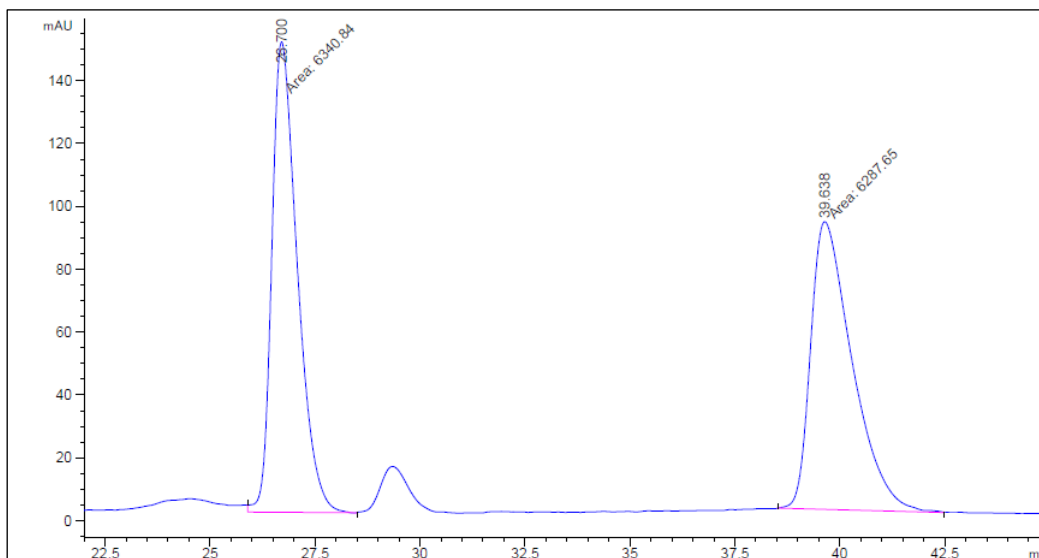

Signal 1: MWD1 C, Sig=210,8 Ref=360,100

| Peak # | RetTime [min] | Type | Width [min] | Area [mAU*s] | Height [mAU] | Area %  |
|--------|---------------|------|-------------|--------------|--------------|---------|
| 1      | 26.700        | MF   | 0.7059      | 6340.84082   | 149.70972    | 50.2106 |
| 2      | 39.638        | MM   | 1.1446      | 6287.64844   | 91.55206     | 49.7894 |

HPLC trace of 3d.

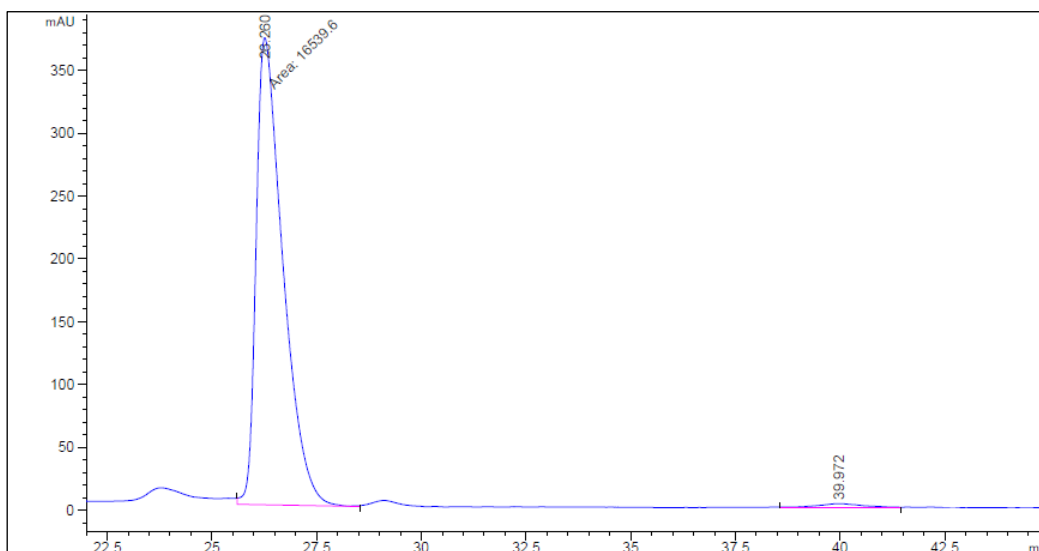

Signal 1: MWD1 C, Sig=210,8 Ref=360,100

| Peak # | RetTime [min] | Type | Width [min] | Area [mAU*s] | Height [mAU] | Area %  |
|--------|---------------|------|-------------|--------------|--------------|---------|
| 1      | 26.260        | FM   | 0.7419      | 1.65396e4    | 371.55261    | 98.7887 |
| 2      | 39.972        | BV   | 0.8499      | 202.80893    | 2.83064      | 1.2113  |

HPLC trace of rac-3e.

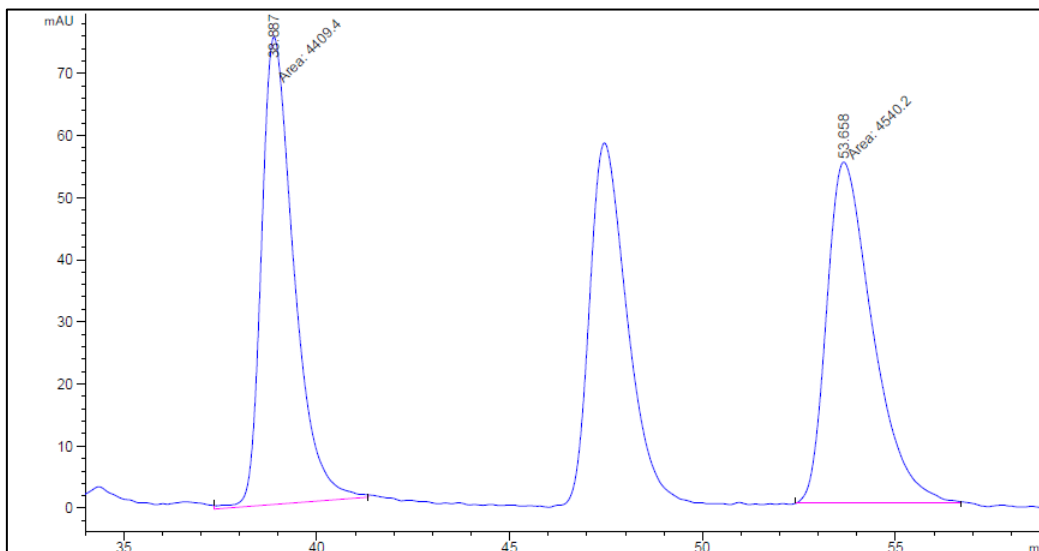

Signal 1: MWD1 C, Sig=210,8 Ref=360,100

| Peak # | RetTime [min] | Type | Width [min] | Area [mAU*s] | Height [mAU] | Area %  |
|--------|---------------|------|-------------|--------------|--------------|---------|
| 1      | 38.887        | MM   | 0.9767      | 4409.40430   | 75.24049     | 49.2693 |
| 2      | 53.658        | MM   | 1.3804      | 4540.20117   | 54.81925     | 50.7307 |

HPLC trace of 3e.

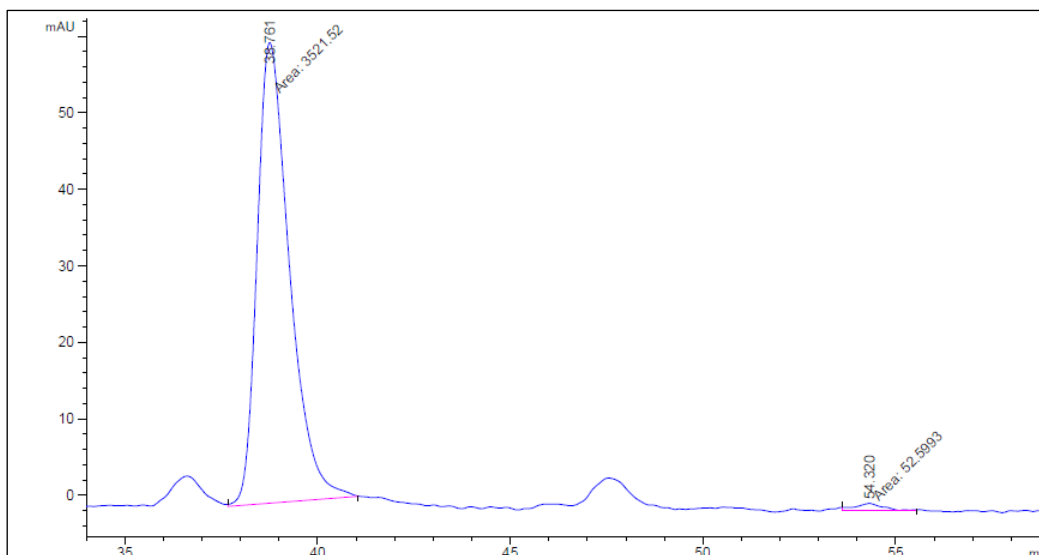

Signal 1: MWD1 C, Sig=210,8 Ref=360,100

| Peak # | RetTime [min] | Type | Width [min] | Area [mAU*s] | Height [mAU] | Area %  |
|--------|---------------|------|-------------|--------------|--------------|---------|
| 1      | 38.761        | MM   | 0.9747      | 3521.52100   | 60.21402     | 98.5283 |
| 2      | 54.320        | MM   | 0.8952      | 52.59932     | 9.79273e-1   | 1.4717  |

HPLC trace of *rac*-3f.

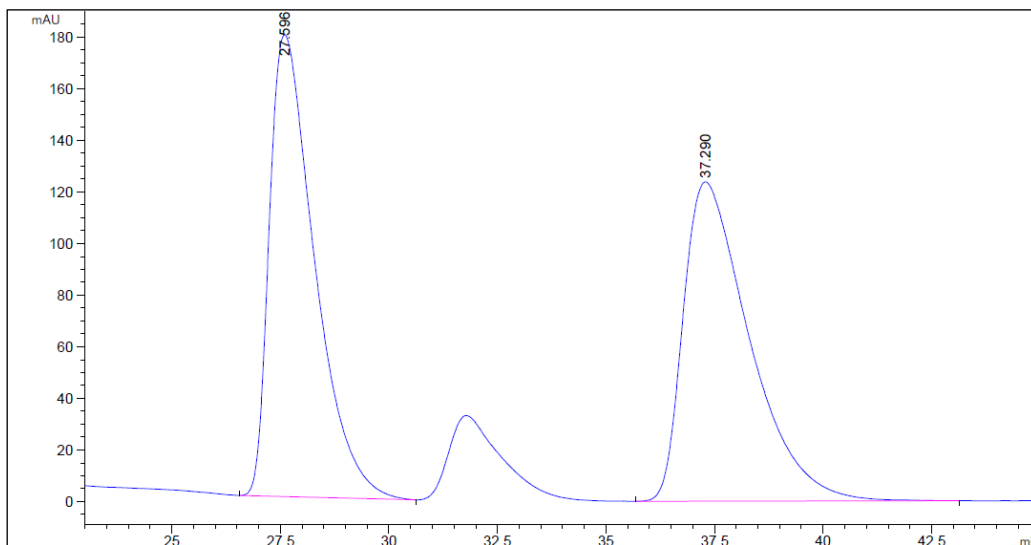

Signal 1: VWD1 A, Wavelength=254 nm

| Peak # | RetTime [min] | Type | Width [min] | Area mAU *s | Height [mAU] | Area %  |
|--------|---------------|------|-------------|-------------|--------------|---------|
| 1      | 27.596        | BB   | 1.0854      | 1.29427e4   | 178.96861    | 49.7454 |
| 2      | 37.290        | BB   | 1.5836      | 1.30752e4   | 123.74281    | 50.2546 |

HPLC trace of 3f.

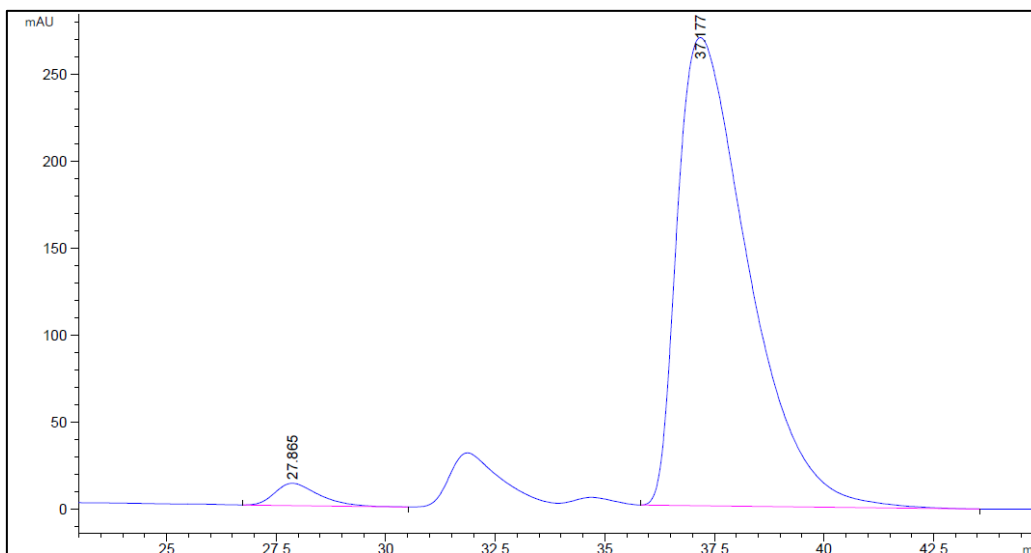

Signal 1: VWD1 A, Wavelength=254 nm

| Peak # | RetTime [min] | Type | Width [min] | Area mAU *s | Height [mAU] | Area %  |
|--------|---------------|------|-------------|-------------|--------------|---------|
| 1      | 27.865        | BB   | 0.9993      | 887.72388   | 12.85521     | 2.8422  |
| 2      | 37.177        | BB   | 1.6990      | 3.03462e4   | 269.00430    | 97.1578 |

HPLC trace of rac-3g.

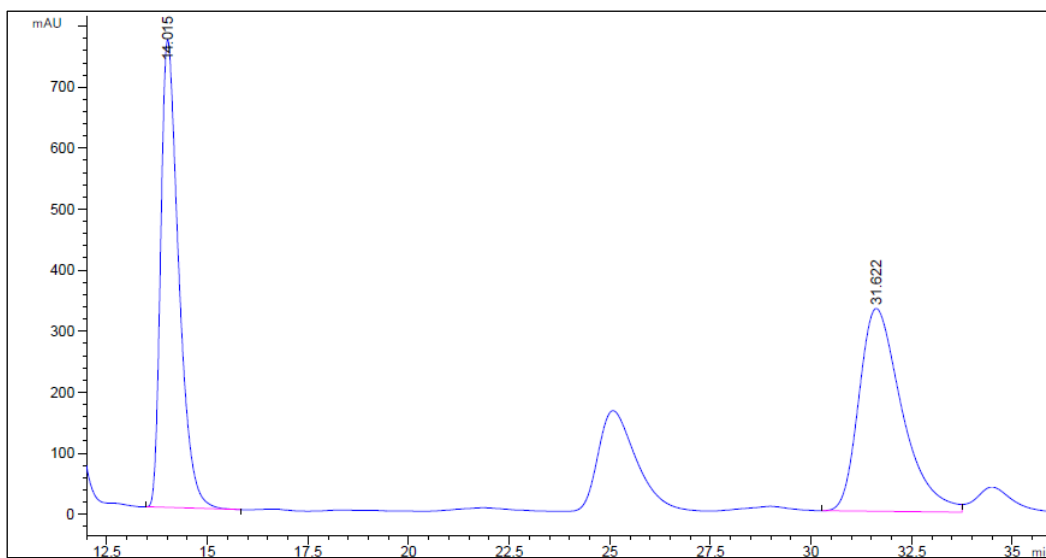

Signal 1: VWD1 A, Wavelength=210 nm

| Peak # | RetTime [min] | Type | Width [min] | Area mAU *s | Height [mAU] | Area %  |
|--------|---------------|------|-------------|-------------|--------------|---------|
| 1      | 14.015        | BB   | 0.4673      | 2.38360e4   | 767.21368    | 49.1651 |
| 2      | 31.622        | BV   | 1.1227      | 2.46455e4   | 332.40646    | 50.8349 |

HPLC trace of 3g.

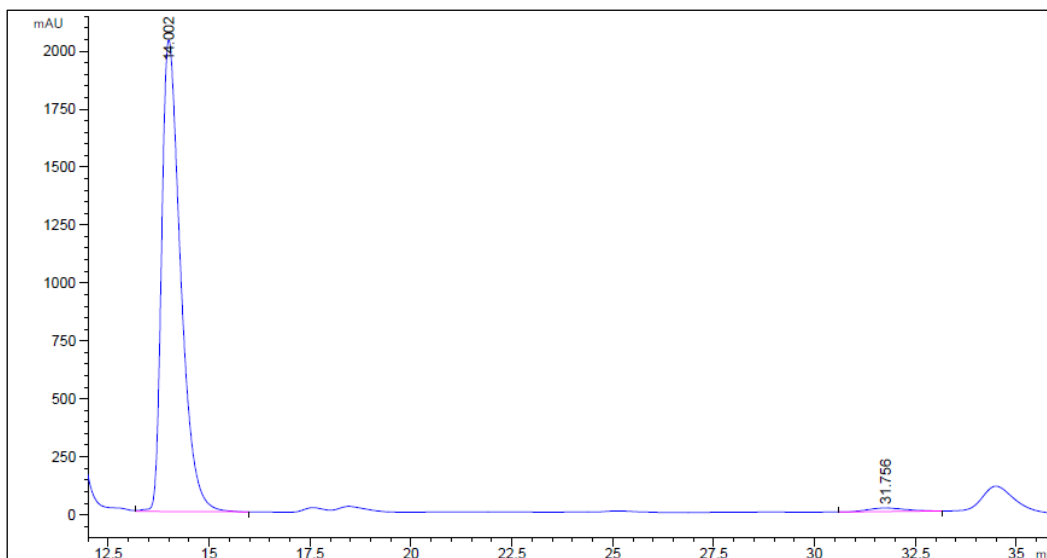

Signal 1: VWD1 A, Wavelength=210 nm

| Peak # | RetTime [min] | Type | Width [min] | Area mAU *s | Height [mAU] | Area %  |
|--------|---------------|------|-------------|-------------|--------------|---------|
| 1      | 14.002        | VB   | 0.4987      | 6.64608e4   | 2036.22937   | 98.5454 |
| 2      | 31.756        | BB   | 0.9934      | 981.01923   | 15.22486     | 1.4546  |



HPLC trace of *rac*-3h.

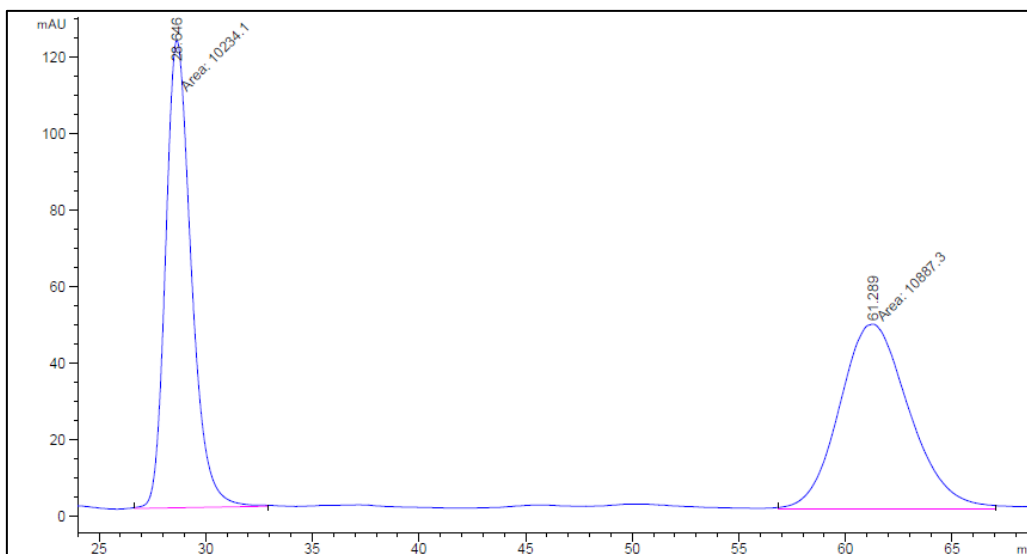

Signal 1: MWD1 D, Sig=230,16 Ref=360,100

| Peak # | RetTime [min] | Type | Width [min] | Area [mAU*s] | Height [mAU] | Area %  |
|--------|---------------|------|-------------|--------------|--------------|---------|
| 1      | 28.646        | MM   | 1.3974      | 1.02341e4    | 122.05883    | 48.4536 |
| 2      | 61.289        | MM   | 3.7718      | 1.08873e4    | 48.10785     | 51.5464 |

HPLC trace of 3h.

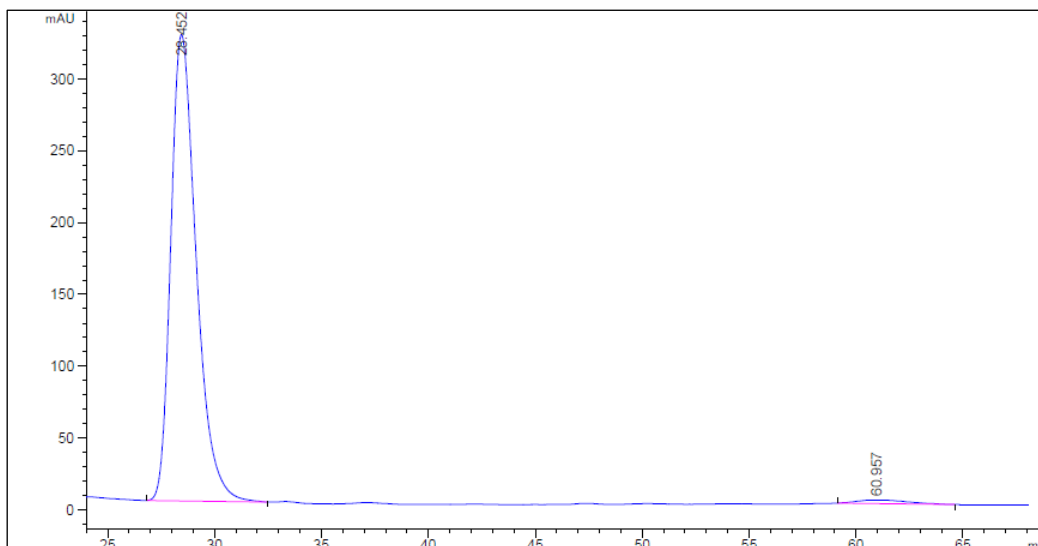

Signal 1: MWD1 D, Sig=230,16 Ref=360,100

| Peak # | RetTime [min] | Type | Width [min] | Area [mAU*s] | Height [mAU] | Area %  |
|--------|---------------|------|-------------|--------------|--------------|---------|
| 1      | 28.452        | BB   | 1.2452      | 2.68562e4    | 324.62097    | 98.4979 |
| 2      | 60.957        | BB   | 1.9636      | 409.56146    | 2.44081      | 1.5021  |

HPLC trace of rac-3i.

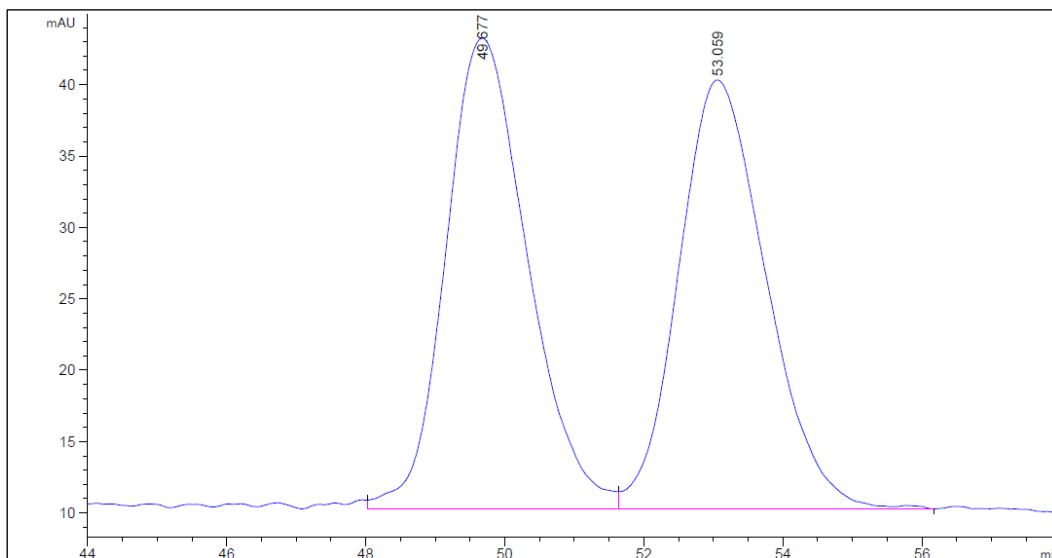

Signal 1: MWD1 C, Sig=210,8 Ref=360,100

| Peak # | RetTime [min] | Type | Width [min] | Area [mAU*s] | Height [mAU] | Area %  |
|--------|---------------|------|-------------|--------------|--------------|---------|
| 1      | 49.677        | VV   | 1.1946      | 2697.23291   | 32.96581     | 50.6633 |
| 2      | 53.059        | VV   | 1.1943      | 2626.60962   | 30.03388     | 49.3367 |

HPLC trace of 3i.

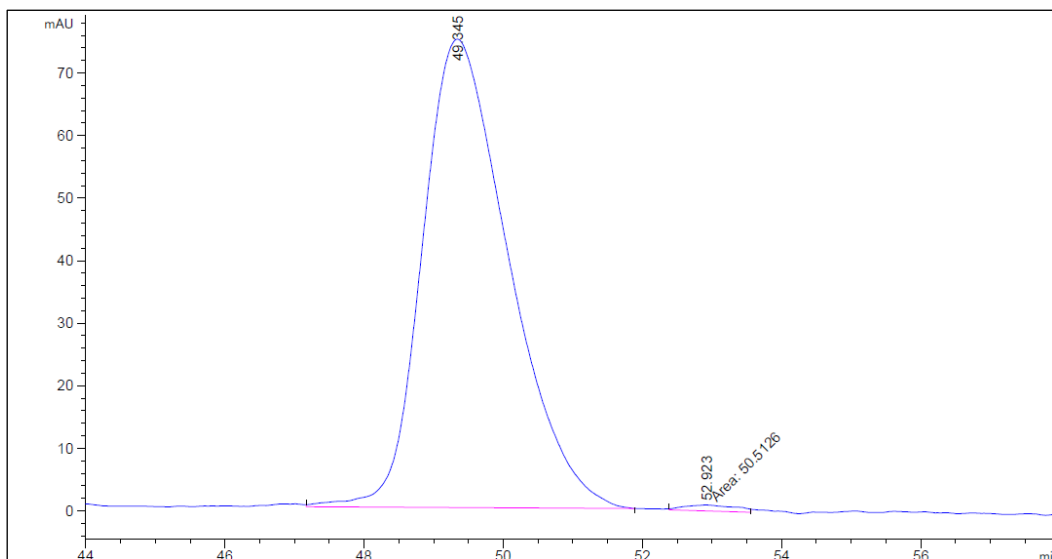

Signal 1: MWD1 C, Sig=210,8 Ref=360,100

| Peak # | RetTime [min] | Type | Width [min] | Area [mAU*s] | Height [mAU] | Area %  |
|--------|---------------|------|-------------|--------------|--------------|---------|
| 1      | 49.345        | VB   | 1.2353      | 6453.86865   | 74.89473     | 99.2234 |
| 2      | 52.923        | MM   | 0.8715      | 50.51263     | 9.65973e-1   | 0.7766  |

HPLC trace of *rac*-3j.

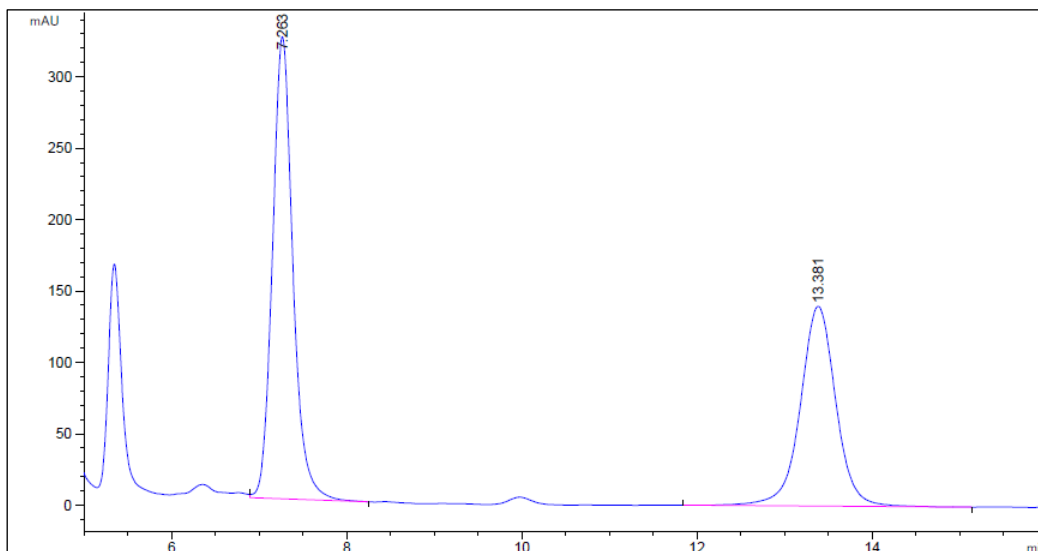

Signal 1: VWD1 A, Wavelength=210 nm

| Peak # | RetTime [min] | Type | Width [min] | Area mAU *s | Height [mAU] | Area %  |
|--------|---------------|------|-------------|-------------|--------------|---------|
| 1      | 7.263         | VB   | 0.2460      | 5246.13672  | 323.38766    | 56.9965 |
| 2      | 13.381        | BB   | 0.4307      | 3958.18384  | 139.83783    | 43.0035 |

HPLC trace of *rac*-3j.

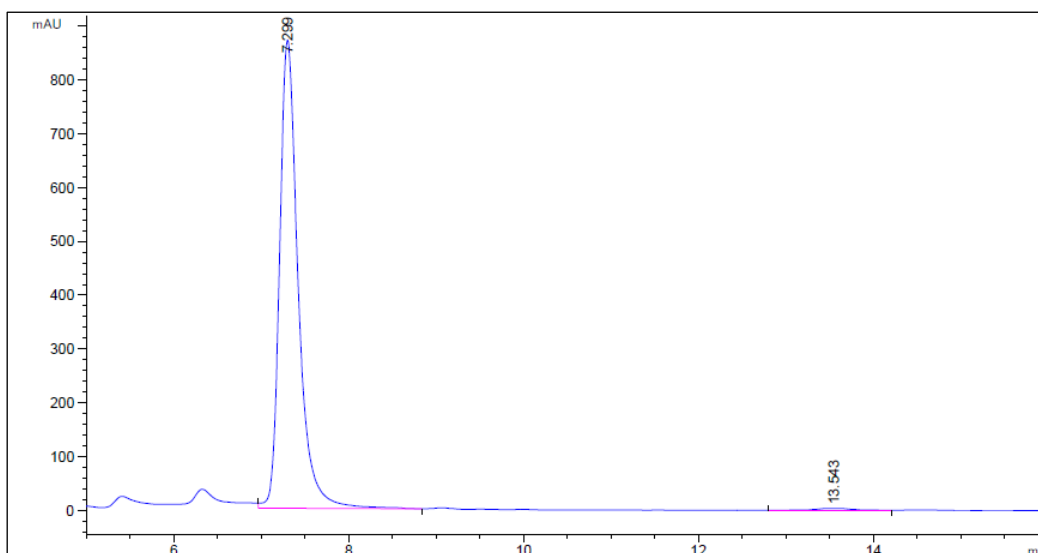

Signal 1: VWD1 A, Wavelength=210 nm

| Peak # | RetTime [min] | Type | Width [min] | Area mAU *s | Height [mAU] | Area %  |
|--------|---------------|------|-------------|-------------|--------------|---------|
| 1      | 7.299         | VB   | 0.2226      | 1.29193e4   | 870.70148    | 99.1623 |
| 2      | 13.543        | BB   | 0.4419      | 109.14244   | 3.87762      | 0.8377  |

HPLC trace of rac-3k.

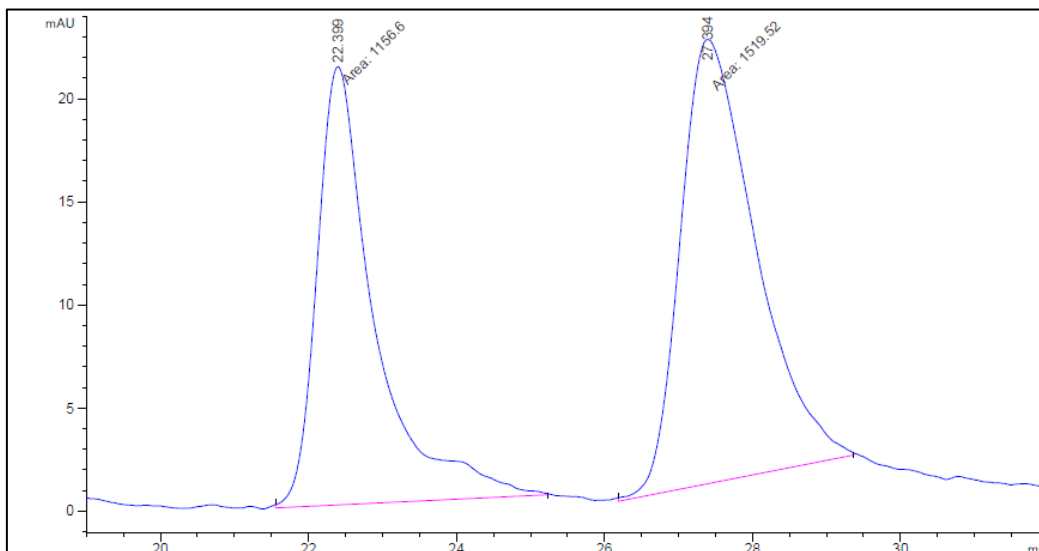

Signal 1: MWD1 C, Sig=210,8 Ref=360,100

| Peak # | RetTime [min] | Type | Width [min] | Area [mAU*s] | Height [mAU] | Area %  |
|--------|---------------|------|-------------|--------------|--------------|---------|
| 1      | 22.399        | MM   | 0.9070      | 1156.59644   | 21.25306     | 43.2192 |
| 2      | 27.394        | MM   | 1.1748      | 1519.51794   | 21.55719     | 56.7808 |

HPLC trace of 3k.

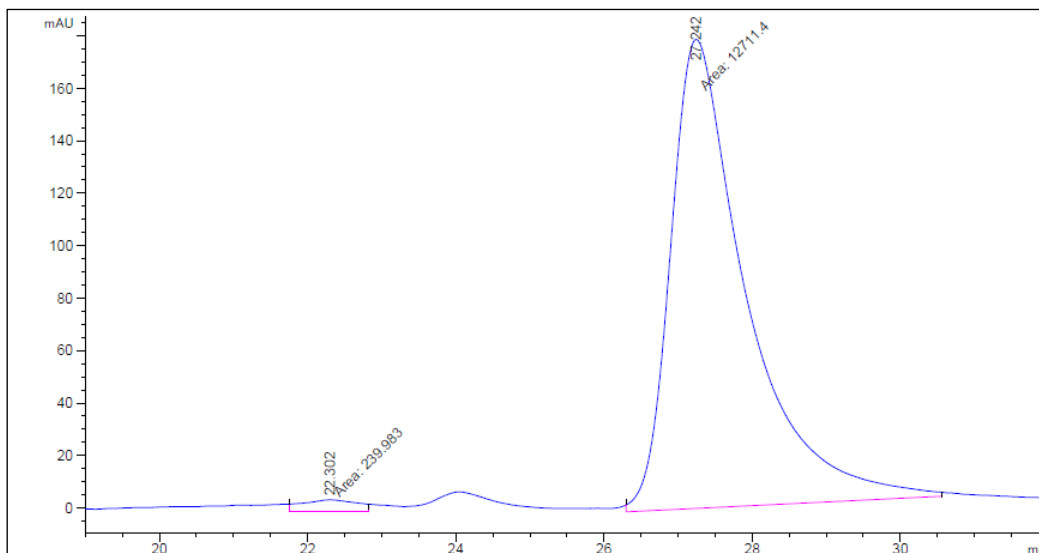

Signal 1: MWD1 C, Sig=210,8 Ref=360,100

| Peak # | RetTime [min] | Type | Width [min] | Area [mAU*s] | Height [mAU] | Area %  |
|--------|---------------|------|-------------|--------------|--------------|---------|
| 1      | 22.302        | MM   | 0.8682      | 239.98329    | 4.60683      | 1.8530  |
| 2      | 27.242        | MM   | 1.1844      | 1.27114e4    | 178.87932    | 98.1470 |

HPLC trace of rac-3l.

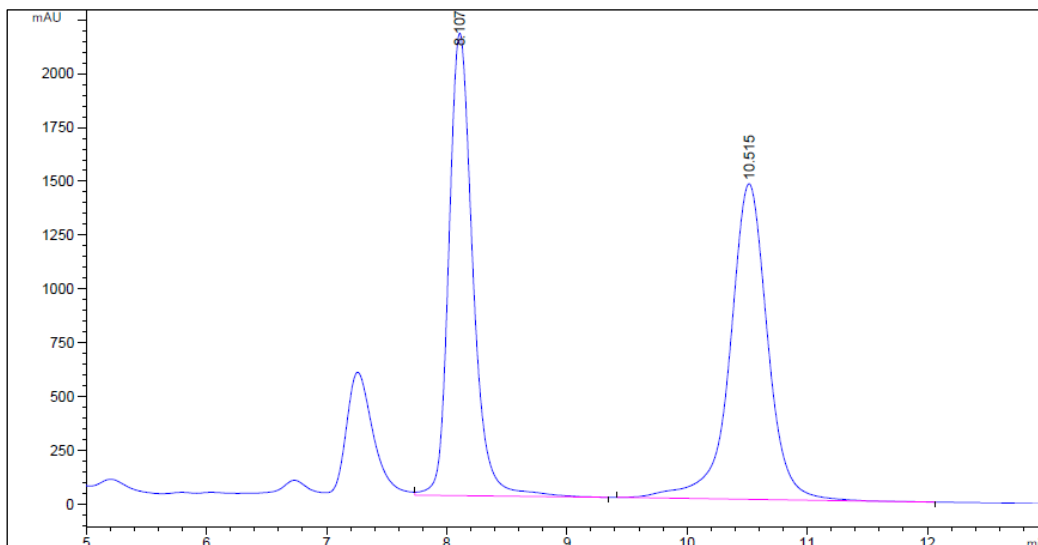

Signal 1: VWD1 A, Wavelength=210 nm

| Peak # | RetTime [min] | Type | Width [min] | Area mAU *s | Height [mAU] | Area %  |
|--------|---------------|------|-------------|-------------|--------------|---------|
| 1      | 8.107         | VB   | 0.2120      | 2.96724e4   | 2150.11060   | 48.1133 |
| 2      | 10.515        | BB   | 0.3302      | 3.19996e4   | 1467.02209   | 51.8867 |

HPLC trace of 3l.

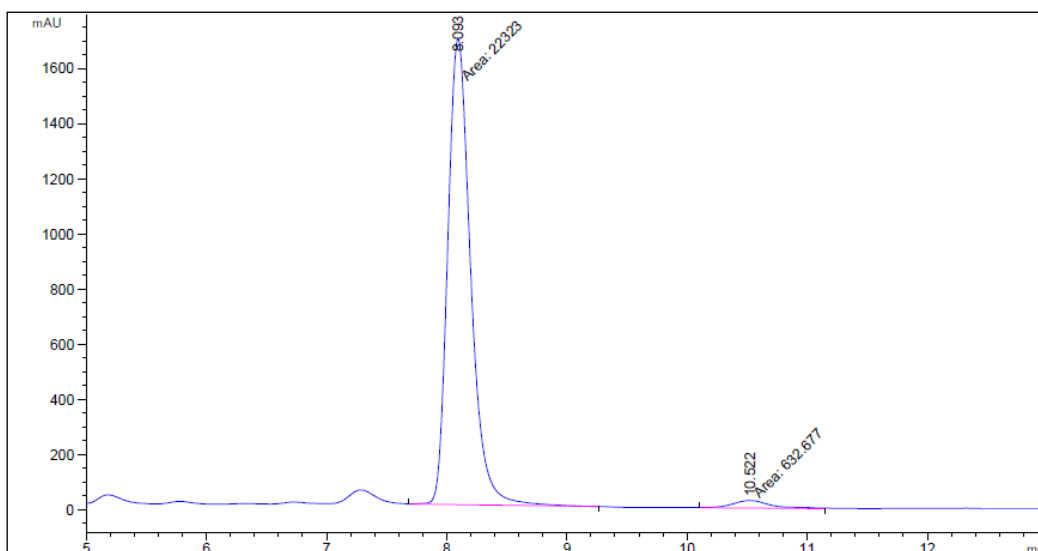

Signal 1: VWD1 A, Wavelength=210 nm

| Peak # | RetTime [min] | Type | Width [min] | Area mAU *s | Height [mAU] | Area %  |
|--------|---------------|------|-------------|-------------|--------------|---------|
| 1      | 8.093         | MM   | 0.2201      | 2.23230e4   | 1690.71277   | 97.2439 |
| 2      | 10.522        | MM   | 0.3757      | 632.67700   | 28.06989     | 2.7561  |

HPLC trace of *rac-red-3m*.

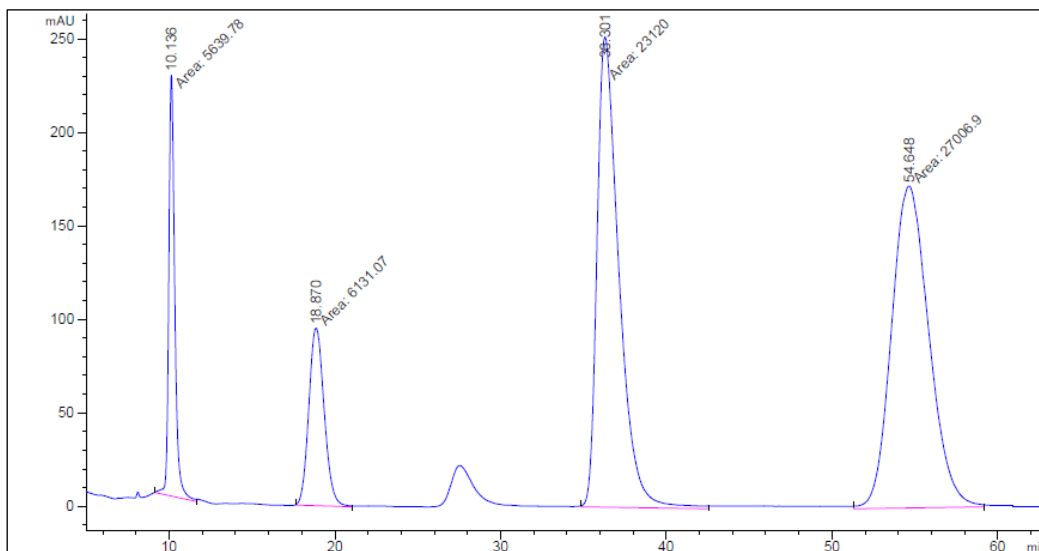

Signal 1: MWD1 D, Sig=230,16 Ref=360,100

| Peak # | RetTime [min] | Type | Width [min] | Area [mAU*s] | Height [mAU] | Area %  |
|--------|---------------|------|-------------|--------------|--------------|---------|
| 1      | 10.136        | MM   | 0.4178      | 5639.77881   | 224.97307    | 9.1114  |
| 2      | 18.870        | MM   | 1.0762      | 6131.07275   | 94.94581     | 9.9052  |
| 3      | 36.301        | MM   | 1.5329      | 2.31200e4    | 251.37956    | 37.3519 |
| 4      | 54.648        | MM   | 2.6160      | 2.70069e4    | 172.06026    | 43.6315 |

HPLC trace of *red-3m*.

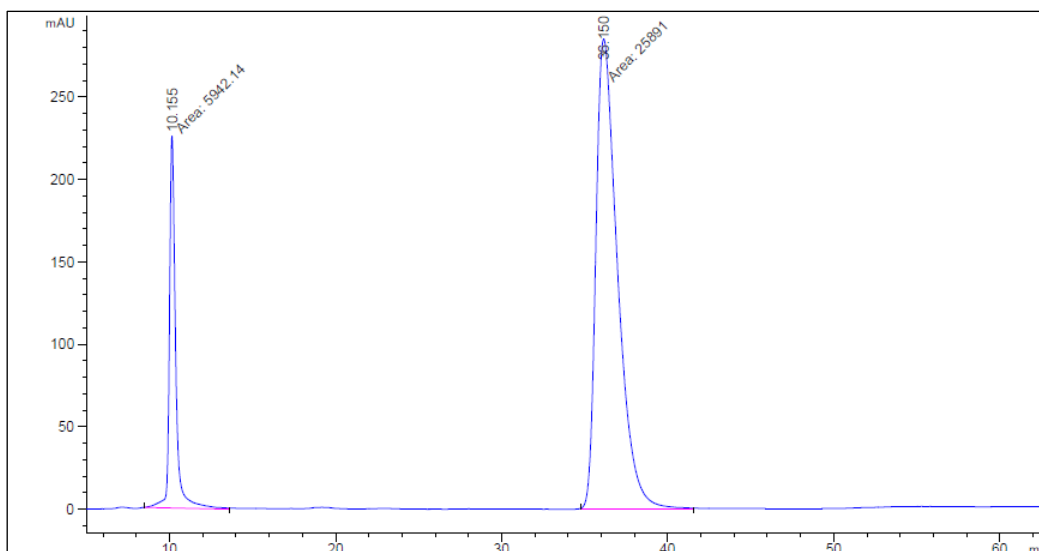

Signal 1: MWD1 D, Sig=230,16 Ref=360,100

| Peak # | RetTime [min] | Type | Width [min] | Area [mAU*s] | Height [mAU] | Area %  |
|--------|---------------|------|-------------|--------------|--------------|---------|
| 1      | 10.155        | MM   | 0.4389      | 5942.14307   | 225.65591    | 18.6665 |
| 2      | 36.150        | MM   | 1.5129      | 2.58910e4    | 285.22424    | 81.3335 |

HPLC trace of *rac-red-3n*.

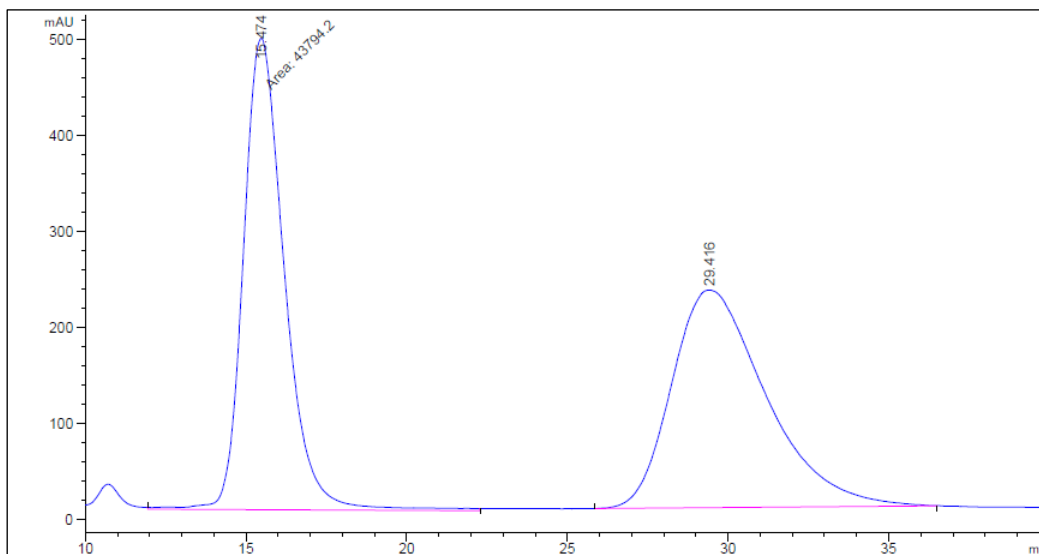

Signal 1: MWD1 C, Sig=210,8 Ref=360,100

| Peak # | RetTime [min] | Type | Width [min] | Area [mAU*s] | Height [mAU] | Area %  |
|--------|---------------|------|-------------|--------------|--------------|---------|
| 1      | 15.474        | MM   | 1.4852      | 4.37942e4    | 491.45636    | 48.6330 |
| 2      | 29.416        | BB   | 2.6569      | 4.62562e4    | 226.85381    | 51.3670 |

HPLC trace of *red-3n*.

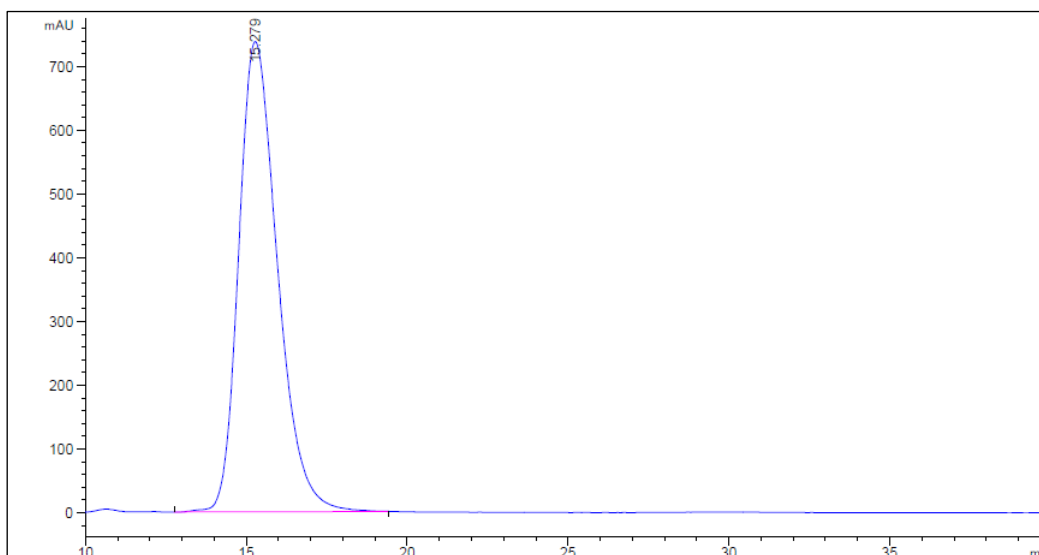

Signal 1: MWD1 C, Sig=210,8 Ref=360,100

| Peak # | RetTime [min] | Type | Width [min] | Area [mAU*s] | Height [mAU] | Area %   |
|--------|---------------|------|-------------|--------------|--------------|----------|
| 1      | 15.279        | VB   | 1.2879      | 6.18549e4    | 737.92737    | 100.0000 |
